# Supplementary material for: Improving neurodevelopmental outcomes in children with congenital heart disease: protocol for a randomised controlled trial of working memory training
Source: PubMed Central journal article supplement — BMJ Open. 2019 Feb 5;9(2):e023304. doi: 10.1136/bmjopen-2018-023304 (PMC6377570; doi:10.1136/bmjopen-2018-023304), 2019-02-05
Supplement: bmjopen-2018-023304.draft_revisions.pdf [file bmjopen-2018-023304.draft_revisions.pdf]

# BMJ Open

BMJ Open is committed to open peer review. As part of this commitment we make the peer review history of every article we publish publicly available.

When an article is published we post the peer reviewers' comments and the authors' responses online. We also post the versions of the paper that were used during peer review. These are the versions that the peer review comments apply to.

The versions of the paper that follow are the versions that were submitted during the peer review process. They are not the versions of record or the final published versions. They should not be cited or distributed as the published version of this manuscript.

BMJ Open is an open access journal and the full, final, typeset and author-corrected version of record of the manuscript is available on our site with no access controls, subscription charges or pay-per-view fees (<http://bmjopen.bmj.com>).

If you have any questions on BMJ Open's open peer review process please email [info.bmjopen@bmj.com](mailto:info.bmjopen@bmj.com)

# BMJ Open

## Improving Neurodevelopmental Outcomes in Children with Congenital Heart Disease: Protocol for a Randomized Controlled Trial of Working Memory Training

|                               |                                                                                                                                                                                                                                                                                                                                                                                                                                                                                                                                                                                                                            |
|-------------------------------|----------------------------------------------------------------------------------------------------------------------------------------------------------------------------------------------------------------------------------------------------------------------------------------------------------------------------------------------------------------------------------------------------------------------------------------------------------------------------------------------------------------------------------------------------------------------------------------------------------------------------|
| Journal:                      | <i>BMJ Open</i>                                                                                                                                                                                                                                                                                                                                                                                                                                                                                                                                                                                                            |
| Manuscript ID                 | bmjopen-2018-023304                                                                                                                                                                                                                                                                                                                                                                                                                                                                                                                                                                                                        |
| Article Type:                 | Protocol                                                                                                                                                                                                                                                                                                                                                                                                                                                                                                                                                                                                                   |
| Date Submitted by the Author: | 30-Mar-2018                                                                                                                                                                                                                                                                                                                                                                                                                                                                                                                                                                                                                |
| Complete List of Authors:     | Calderon, Johanna; Boston Children's Hospital, Psychiatry; Harvard Medical School, Psychiatry<br>Bellinger, David; Children's Hospital Boston, Psychiatry; Harvard Medical School, Psychiatry<br>Hartigan, Catherine; Children's Hospital Boston, Cardiology<br>Lord, Alison; Children's Hospital Boston, Cardiology<br>Stopp, Christian; Children's Hospital Boston, Cardiology<br>Wypij, David ; Children's Hospital Boston, Cardiology; Harvard University T H Chan School of Public Health, Department of Biostatistics<br>Newburger, Jane; Children's Hospital Boston, Cardiology; Harvard Medical School, Pediatrics |
| Keywords:                     | Working Memory, Congenital heart disease < CARDIOLOGY, Executive Function Intervention, Cogmed, Infant heart surgery                                                                                                                                                                                                                                                                                                                                                                                                                                                                                                       |
|                               |                                                                                                                                                                                                                                                                                                                                                                                                                                                                                                                                                                                                                            |

SCHOLARONE™  
Manuscripts

Only

Running Head: Executive Function Intervention for Children with CHD

1  
2  
3  
4  
5  
6  
7  
8 **Improving Neurodevelopmental Outcomes in Children with Congenital Heart Disease:**  
9  
10 **Protocol for a Randomized Controlled Trial of Working Memory Training**  
11  
12  
13  
14  
15  
16  
17  
18

19 Johanna Calderon<sup>1,2</sup>, PhD, David C. Bellinger,<sup>1,2</sup> PhD, MSc, Catherine Hartigan<sup>3</sup>, BA,  
20  
21 Alison Lord<sup>3</sup>, BS, Christian Stopp<sup>3</sup>, MS, David Wypij<sup>3,4</sup>, PhD,  
22  
23 and Jane W. Newburger<sup>3,5</sup>, MD, MPH  
24  
25  
26  
27  
28  
29  
30

31 <sup>1</sup> Department of Psychiatry, Boston Children's Hospital, Boston, MA

32 <sup>2</sup> Department of Psychiatry, Harvard Medical School, Boston, MA

33 <sup>3</sup> Department of Cardiology, Boston Children's Hospital, Boston, MA

34 <sup>4</sup> Department of Biostatistics, Harvard T.H. Chan School of Public Health, Boston, MA

35 <sup>5</sup> Department of Pediatrics, Harvard Medical School, Boston, MA  
36  
37  
38  
39  
40

41 Corresponding author: Dr. Johanna Calderon, Department of Psychiatry, Boston Children's

42 Hospital, 21 Autumn Street, AT110.3. Boston, MA 02115. E-mail:

43  
44 [johanna.calderon@childrens.harvard.edu](mailto:johanna.calderon@childrens.harvard.edu)  
45  
46  
47  
48  
49

50 Word count (abstract): 307

51  
52 Word Count (article body): 4350  
53  
54  
55  
56  
57  
58  
59  
60

Running Head: Executive Function Intervention for Children with CHD

## Abstract

**Introduction:** Executive function (EF) impairments are among the most prevalent neurodevelopmental morbidities in youth with congenital heart disease (CHD). To date, no studies have been undertaken to investigate the efficacy of cognitive interventions aimed at improving EF outcomes in children with CHD.

**Methods and analysis:** This is a single center, single-blinded, two-arm randomized controlled trial to test the efficacy of Cogmed Working Memory Training (Cogmed) *versus* standard of care in children with CHD after open-heart surgery in infancy. Participants will consist of 100 children with CHD aged 7-12 years who underwent open-heart surgery before the age of 12 months. Participants will be randomly allocated to either an intervention group including training on the home-based Cogmed intervention for a duration of approximately 5 weeks or a control group who receive the standard of care for children with CHD. We seek to evaluate the efficacy of Cogmed at post-treatment and 3-months after completion of the intervention. Baseline, post-treatment, and 3-month follow-up assessments will include specific measures of EF, cognitive and social functioning, and ADHD symptoms. The primary outcome of this study will be the change in standardized mean score on the List Sorting Working Memory test from the NIH Toolbox for the Assessment of Neurological and Behavioral Function. Secondary outcomes will include measures of social skills, inhibitory control, cognitive flexibility, and behavioral EF as well as ADHD symptoms as measured by the Behavior Rating Inventory of Executive Function, Second Edition and the Conners 3<sup>rd</sup> Edition. The efficacy of the intervention will be evaluated by comparing within-subject differences (baseline to post-treatment, baseline to 3-month follow-up) between the two groups using an intention-to-treat analysis.

**Ethics and dissemination:** This study has received full Institutional Review Board (IRB) approval from Boston's Children's Hospital IRB (P00022440) and has also been reviewed and approved by the Human Protection Agency from the US Department of Defense.

**Trial Registration Number:** NCT03023644

Running Head: Executive Function Intervention for Children with CHD

### Strengths and limitations of this study

- To our knowledge, this is the first randomized controlled trial (RCT) investigating the efficacy of an executive function intervention in improving outcomes for children with congenital heart disease (CHD).
- The home-based Cogmed Working Memory Training (Cogmed) is among the most widely-used evidence-based programs targeting core executive function skills and will directly address the most frequent neurodevelopmental impairment for children with critical CHD that strongly impacts their ability to succeed in academic and social environments.
- This intervention will be individually adapted to each child's own executive function level, which ensures an optimal level of performance throughout the sessions.
- As a home-based intervention, Cogmed reduces the need for hospital-based treatment visits, potentially reducing the burden for families of children with chronic health conditions such as critical CHD.
- This RCT will include computerized individual measures of neurodevelopment and parent- and teacher-rating scales of behavioral and social outcomes as well as collection of patient-specific factors to investigate their potential relationship with response to treatment.

Running Head: Executive Function Intervention for Children with CHD

## INTRODUCTION

Congenital heart lesions are among the most common birth defects,<sup>1-2</sup> with approximately 1% of infants born with congenital heart disease (CHD). Of these, more than one-third will present with critical CHD requiring cardiac surgery in infancy.<sup>3</sup> Advances in prenatal diagnosis as well as medical and surgical care have reduced mortality rates for all forms of CHD. However, evidence of central nervous system damage, including delayed brain maturation *in utero* and abnormal brain metabolism and microstructure associated with hypoxic-ischemic injury, has been reported by a wealth of studies of critical CHD.<sup>4-7</sup> A dramatic increase in the population of survivors of infant heart surgery has been accompanied by the increased recognition of their long-term postoperative morbidities. Neurodevelopmental disabilities, particularly executive function (EF) impairments, are currently the most prevalent long-term morbidity in the population with CHD.<sup>4</sup> EF refers to a set of higher-order neurocognitive abilities that serve to coordinate and organize actions towards a goal, allowing the individual to adapt to new or complex situations.<sup>8</sup> Impairments in EF manifest as behavioral dysregulation and attention problems, impaired working memory (i.e., the ability to keep information in mind and manipulate it over a short period of time), and problems with organization and planning abilities. EF is more strongly associated with school readiness than is IQ, predicts both mathematics and reading competence throughout the school years<sup>8-10</sup> and is strongly associated with social cognition (i.e., decoding other people's mental and emotional states and responding to rapid-paced social interactions).<sup>9</sup>

Executive dysfunction can profoundly impact all dimensions of a child's development<sup>11-14</sup> and is a core feature of attention deficit hyperactivity disorder (ADHD)<sup>15</sup> and autism spectrum symptoms.<sup>16-17</sup> If untreated, deficits in EF may also predispose individuals to later addiction,<sup>18</sup>

Running Head: Executive Function Intervention for Children with CHD

1  
2  
3 eating disorders and obesity,<sup>19</sup> and risk-taking behaviors.<sup>20</sup> These adverse sequelae may carry  
4  
5 profound implications for the educational achievement, future employment, and quality of life of  
6  
7 individuals with CHD.<sup>4</sup> To date, no trials have been undertaken to test treatments aimed at  
8  
9 improving executive dysfunction and attention deficits in the CHD population.  
10  
11  
12  
13

### 14 **EF in critical CHD**

15  
16  
17 Impairments in EF are at the heart of the neurodevelopmental phenotype associated with  
18  
19 critical CHD after open-heart surgery.<sup>21-34</sup> EF deficits in children with CHD were first reported  
20  
21 in school-aged children with dextro-transposition of the great arteries (d-TGA).<sup>25</sup> Standardized  
22  
23 neuropsychological testing showed that patients with d-TGA had substantial difficulty planning  
24  
25 and alternating between tasks, which suggested impairments in cognitive flexibility and working  
26  
27 memory as well as deficits in planning and sustained attention. On the Behavior Rating  
28  
29 Inventory of Executive Function (BRIEF), parents and teachers of adolescents with CHD  
30  
31 reported significant difficulties, particularly with regard to working memory.<sup>22</sup> Compared to  
32  
33 normative values, parents' ratings were worse by ~0.5 SD and those of teachers by ~1 SD,  
34  
35 suggesting not only statistically significant but clinically meaningful impairments. More recent  
36  
37 findings also reported specific EF impairments in preschool and school-aged children with d-  
38  
39 TGA.<sup>21,23-24</sup> In particular, children had important difficulties in behavioral regulation and  
40  
41 cognitive control of attention, and they had worse performances on verbal and visual working  
42  
43 memory tasks. Consistent findings have been reported by studies including children with other  
44  
45 types of critical CHD such as tetralogy of Fallot<sup>28</sup> or single ventricle physiology requiring the  
46  
47 Fontan operation.<sup>29</sup> Finally, EF impairments have been associated with worse psychosocial  
48  
49  
50  
51  
52  
53  
54  
55  
56  
57  
58  
59  
60

Running Head: Executive Function Intervention for Children with CHD

health status and worse quality of life in youth with critical CHD,<sup>31</sup> highlighting the potential impact of long-term executive dysfunction on mental health in CHD.<sup>32</sup>

### **Working memory intervention for children with CHD**

The American Heart Association (AHA) recommends routine neurodevelopmental screening of all CHD survivors.<sup>4</sup> A burgeoning literature documents the prevalence and importance of impaired EF and ADHD in CHD survivors,<sup>21-40</sup> and brain imaging studies have provided key information on the underlying disturbances in brain structure and microstructure in patients with CHD.<sup>5-7</sup> Yet to date, no trials have been undertaken to test interventions targeting EF and attention deficits in the CHD population.<sup>34</sup>

Cogmed Working Memory Training (Cogmed) is the most widely used computerized evidence-based intervention that targets EF, specifically providing intensive structured training of working memory.<sup>41-54</sup> It has been shown to improve executive performance in several clinical and non-clinical pediatric populations, including children with ADHD,<sup>41-42;46-47</sup> low working memory and low achievement,<sup>43-44</sup> and children who were born preterm or extremely low-birth weight.<sup>53-54</sup> Unlike other hospital- or laboratory-based interventions, Cogmed can be implemented as a home-based intervention for children. Studies using Cogmed have shown that subjects demonstrate the ability to transfer skills to non-trained tests of working memory as well as to tasks that involve similar processes, including attention, inhibition, and non-verbal reasoning.<sup>51-53</sup> The positive effect of training has been observed on parental ratings of inattention, including the DSM-IV Parent Rating Scale, ADHD-RS-IV, BRIEF, and Conners' Parent Rating Scale. Sustained improvements in behavior as measured by rating scales have also been observed in ADHD,<sup>48</sup> brain injury,<sup>49-50</sup> and non-clinical groups.<sup>51-52</sup>



## Running Head: Executive Function Intervention for Children with CHD

1  
2  
3 In summary, several randomized controlled trials evaluating the use of Cogmed in healthy  
4 children<sup>44; 51-52</sup> and in children with various conditions<sup>41-42;47;53-54</sup> have demonstrated that this  
5 neurocognitive intervention produces significant generalized and sustained enhancement on  
6 measures of EF, and also on everyday life learning and behavioral skills. It is proposed that  
7 training working memory using Cogmed is a promising intervention for school-aged children  
8 with critical CHD because: (1) it addresses the most frequent neurodevelopmental morbidities  
9 that strongly impact the ability to succeed in academic and social environments; (2) it allows for  
10 intensive and structured practice of targeted skills, with possible transfer to other  
11 neurodevelopmental domains; (3) it is individually adapted to each child's own EF levels, which  
12 ensures an optimal level of performance throughout the sessions; (4) it is closely monitored, and  
13 various parameters of the child's performance are systematically recorded (e.g., correct answers,  
14 speed at which tasks are completed); (5) it is child-friendly and rewarding, which facilitates  
15 children's compliance; and, finally, but importantly (6) as a home-based intervention, it reduces  
16 the need for hospital/clinic-based visits and multiple costs of individual therapy, potentially  
17 reducing the burden for families of children with chronic health conditions such as critical CHD.

18  
19  
20  
21  
22  
23  
24  
25  
26  
27  
28  
29  
30  
31  
32  
33  
34  
35  
36  
37  
38 In this project, we will conduct a randomized controlled trial (RCT) to provide the first  
39 proof-of-concept that Cogmed intervention improves neurodevelopmental outcomes in children  
40 with CHD, and that the improvements persist to 3 months. We will enroll children with CHD  
41 who underwent infant open-heart surgery as this population corresponds to the highest risk  
42 category for developmental disorders and disabilities as stated in the AHA guidelines (Class I;  
43 Level of Evidence A).<sup>4</sup> We propose to determine post-treatment and longer-term effects on both  
44 laboratory-based tests and ecological measures of children's EF, ADHD, and social difficulties  
45  
46  
47  
48  
49  
50  
51  
52  
53  
54  
55  
56  
57  
58  
59  
60

Running Head: Executive Function Intervention for Children with CHD

in everyday life. Our study will also provide insight into factors that are associated with response to treatment, identifying children who may be most likely to benefit from the intervention.

### **Aims and hypotheses**

Specific Aim 1: To evaluate the immediate efficacy of home-based Cogmed intervention for neurodevelopmental outcomes in children with CHD. We hypothesize that children who receive the Cogmed intervention, compared with controls receiving standard of care, will display greater improvement from baseline to post-treatment assessment in EF and social development, and greater reduction in symptoms of ADHD.

Our primary outcome measure will be the change in standardized mean score on the working memory test from the National Institutes of Health Toolbox for the Assessment of Neurological and Behavioral Function (NIH Toolbox)<sup>55</sup> from baseline to post-treatment. Secondary outcomes include changes in standardized mean scores on tests of cognitive flexibility, attention, inhibitory control, and speed of processing from the NIH Toolbox; the Global Executive Composite from the Behavior Rating Inventory of Executive Function, 2<sup>nd</sup> Edition (BRIEF-2)<sup>56</sup>, the Global Index and the ADHD Index from the Conners 3<sup>rd</sup> Edition (Conners-3)<sup>57</sup>, and the Social Responsiveness Scale, 2<sup>nd</sup> Edition (SRS-2).<sup>58</sup>

Specific Aim 2: To assess the longer-term effects of the Cogmed intervention at 3-month follow-up. We predict that significant gains in neurodevelopmental and behavioral outcomes will persist 3 months after cessation of intervention for children who received Cogmed as compared to controls.

Running Head: Executive Function Intervention for Children with CHD

The primary and secondary outcomes will be the same as those in Specific Aim 1, except that the change in scores will be from baseline to 3-month follow-up (i.e., approximately 3 months after the last Cogmed session).

Specific Aim 3: To explore cognitive, medical, and sociodemographic factors associated with changes in neurodevelopmental and behavioral scores for children who received Cogmed intervention.

## METHODS AND ANALYSIS

### Study design

This is a single center, single-blinded, two-arm RCT to test the efficacy of Cogmed intervention *versus* standard of care in children with CHD after neonatal and/or infant open-heart surgery (n=50 in each group). All eligible subjects will undergo a baseline neurodevelopmental assessment and then will be randomly assigned to either the standard home-based Cogmed intervention or to a control group receiving the standard of care for children with CHD. All participants will undergo a post-treatment and a 3-month follow-up assessment. All investigators collecting outcome data will be blinded to patients' group assignment (Cogmed intervention *versus* standard of care) and to medical and surgical histories. For children assigned to the Cogmed group, post-treatment assessments will be performed one to two weeks after the end of the intervention (i.e., approximately 7-8 weeks after baseline assessment) and follow-up will be performed 3 months after the end of the intervention (i.e., approximately 5 months after baseline assessment). For children in the control group, post-treatment and 3-month follow-up assessments will be performed approximately 7-8 weeks and 5 months after baseline assessment, respectively.

Running Head: Executive Function Intervention for Children with CHD

### Participants and recruitment

Participants will be included if they meet the following criteria: (1) diagnosis of CHD requiring open-heart surgery before one year of age; (2) age between 7 and 12 years at baseline assessment; (3)  $\geq 6$  months post cardiac surgery; (4) had received cardiovascular care at Boston Children's Hospital; (5) English or Spanish speaking; (6) informed consent from parent/guardian as well as assent of the child. Exclusion criteria will be: (1) diagnosed chromosomal anomalies and/or genetic syndromes; (2) severe physical and/or sensory impairments (hearing, visual, or psychomotor) that would prevent the use of the computerized program; (3) confirmed diagnosis of an autism spectrum disorder and/or severe developmental or intellectual disorder that would prevent successful completion of the planned study testing; (4) placement in a separate classroom receiving individual support; (5) scheduled to undergo major cardiac interventions in the 6 months following enrollment; (6) received, receiving, or scheduled to receive Cogmed or any other computerized behavioral training program targeting EF or ADHD. We will not exclude children with a pre-existing neurological history (e.g., epilepsy, stroke) or with a history of a concurrent diagnosis of ADHD (treated or untreated). Rather, we will account for these factors in the data analysis.

Eligible children living in the United States will be recruited through patient databases of Boston Children's Hospital Cardiology Clinic and affiliated New England medical centers. Families will be invited to participate in the study via a mail packet and follow-up phone call. Flyers and study brochures will be displayed in Boston Children's Hospital Cardiology Clinic and affiliated medical centers as well as in some local advocacy parent organizations. Participants will be assessed for eligibility and enrolled by a study coordinator and a research

Running Head: Executive Function Intervention for Children with CHD

nurse. Informed consent and assent from the child will be obtained by a study coordinator or a research neuropsychologist before the baseline assessment at the hospital.

### **Randomization and stratification**

All eligible subjects will undergo a baseline neurodevelopmental assessment ([Figure 1](#)) and then will be randomly assigned to either the standard home-based Cogmed intervention group or to a control group (standard of care). Subjects will be assigned in the order in which they are enrolled into the study. Randomization will be done by computerized permuted blocks design with blocks of varying sizes. Once a subject has been assigned to a group, he/she will remain in the same trial arm for the duration of the study. The randomization scheme will involve two stratification factors: type of CHD (univentricular or biventricular) and baseline level of EF (a score  $<85$  or  $\geq 85$  on the working memory test from the NIH Toolbox). [Figure 1](#) shows the flowchart of the trial design.

### **Intervention group: Home-based Cogmed Working Memory Training**

Children randomly assigned to receive the Cogmed intervention will complete the standard home-based format of the program, Cogmed RM, for children aged 7 years and older. The training program contains 12 different neurocognitive tasks. All tasks are adaptive, i.e., task complexity levels are automatically adjusted to match each child's working memory capacity. Tasks become more difficult as a function of performance on a session-by-session basis. Each training session lasts approximately 40-50 minutes, with one session to be completed per day 5 days each week for 5 weeks, for a total of 25 sessions. The program yields individual session-by-session and task-by-task training results, including the children's responses, time spent on each

Running Head: Executive Function Intervention for Children with CHD

task, and evolution curves. Cogmed is not FDA-regulated. Based on our specific aims, Cogmed is considered a Non-Significant Risk Device.

Study tablets (i.e., iPads) will be provided to families randomized to the Cogmed group in order to standardize the method of delivery. Families will receive a link for downloading a web-based software program to the tablet. The program will be installed on the tablet by a study coordinator who will explain how the training program works and how to log into the system and complete training. The training session and installation of the program will be completed after baseline assessment and randomization. Parents and children will be actively involved, and during the installation session, children will complete several practice trials under the supervision of the study coordinator. The 25 sessions will be completed by the child, supervised by a parent. For the first 5 sessions, the child trains on the same set of games; on the 6<sup>th</sup> session and every 5<sup>th</sup> session thereafter, a new task is introduced and replaces one of the initial tasks. At the end of each session, the child can play an age-appropriate tablet game as a reward. After each session, a parent will upload the results to a secure website. Families will be contacted weekly to check program function and discuss concerns. Compliance is automatically registered and is defined as completing at least 20 sessions, the criterion by which children will be categorized as compliant or non-compliant to treatment.<sup>41-42</sup>

To implement this intervention, each investigator and study coordinator involved in coaching will be certified as a “Cogmed Coach.” The Cogmed Coaches will monitor children’s performance every week during the intervention to permit continuous evaluation of treatment compliance and fidelity. A designated Cogmed Coach will be available during the trial to respond to any questions or help with any difficulties during the training. Parents will be asked to complete a training evaluation scale following completion of Cogmed; this scale is an integrated

Running Head: Executive Function Intervention for Children with CHD

component of Cogmed that gathers information regarding the child's motivation and attention during the training as well as parents' feedback. As soon as a child finishes the intervention, a blinded post-treatment assessment will be scheduled to occur within the following weeks.

### **Control group: Standard of care**

Children randomly assigned to the control group will receive the standard of care recommended for patients with critical CHD. This includes cardiac surveillance and, if needed, neurodevelopmental counseling and screening at Boston Children's Hospital Cardiac Neurodevelopmental Program. Once enrolled in the study, a child in the control group will not receive Cogmed intervention or any other cognitive intervention that targets executive functions or ADHD symptoms until after the 3-month follow-up assessment is completed, i.e., 5-6 months after initial enrollment. Like children assigned to the intervention group, children in the control group can continue treatments that are already in place for other neurodevelopmental disabilities (e.g., speech therapy, occupational services). For children in the control group, post-treatment and 3-month follow-up assessments will be performed 6 to 7 weeks and 4 to 5 months after baseline assessment, respectively. After the study is completed, children in the control group will be offered the possibility of completing the Cogmed intervention at no cost.

### **Primary outcome measure**

The NIH Toolbox<sup>55</sup> is a set of computerized assessments designed to measure outcomes in longitudinal or intervention trials. This battery is particularly appropriate for our study because it is presented in a computerized child-friendly version, paralleling that of the Cogmed intervention. The *List Sorting Working Memory Test* from the NIH Toolbox is the primary outcome of the trial. This standardized measure assesses the ability to process information across a series of modalities (visual-spatial and verbal), to hold this information in a short-term buffer,

Running Head: Executive Function Intervention for Children with CHD

and to actively manipulate it mentally. It is considered an excellent composite indicator of children's EF skills, as it requires the simultaneous implementation of control of attention and working memory abilities on tasks of increasing complexity. Mean scores are automatically computed and are compared to a standardization sample of US children of the same age. They are normally distributed (mean=100, SD=15) in the standardization sample. The construct validity of the NIH Toolbox working memory tasks is 0.58 for convergent validity and 0.30 for divergent validity. This test has a test-retest reliability of 0.89 (95% confidence interval: 0.85 to 0.92).

### Secondary outcome measures

**NIH Toolbox Cognition Battery.**<sup>55</sup> We will include tests that measure cognitive flexibility, attention and inhibitory control, episodic memory, language, and processing speed. Mean scores on the following tests will be our secondary outcomes: (1) *Flanker Inhibitory Control and Attention Test*, which measures a child's ability to control automatic response tendencies that may interfere with achieving a goal; (2) *Dimensional Change Card Sort Test*, which assesses a child's capacity to switch among multiple aspects of a task; (3) *Picture Sequence Memory Test*, which measures a child's ability to remember the sequence of pictures shown on the screen; (4) *Picture Vocabulary Test* and *Oral Reading Recognition*, which assess receptive vocabulary and reading decoding skills; and (5) *Pattern Comparison Processing Speed Test*, which assesses the amount of time it takes a child to process a set amount of information. All scores are standardized and normally distributed (mean=100, SD=15) in the standardization sample. The test-retest reliability of these tests varies between 0.82 and 0.96.

**Behavior Rating Inventory of Executive Function, Second Edition.**<sup>56</sup> The BRIEF-2 is a standardized questionnaire measuring children's every-day life executive functioning. It includes



Running Head: Executive Function Intervention for Children with CHD

1  
2  
3 nine scales: Inhibit, Self-Monitor, Shift, Emotional Control, Initiate, Working Memory,  
4 Plan/Organize, Task-Monitor, and Organization of Materials. Parent and teacher versions of the  
5 BRIEF-2 will be included. We will analyze the General Executive Composite T score (mean=50,  
6 SD=10 for the standardization sample) for each version (Parent and Teacher), which incorporate  
7 results from all clinical scales. The composite indices of the BRIEF-2 have high internal  
8 consistency (0.94 to 0.98 in the normative sample) and high test-retest reliability (0.84 to 0.88  
9 for parents over a 2-week interval; 0.90 to 0.92 for teachers over a 3.5-week interval).

10  
11  
12  
13  
14  
15  
16  
17  
18  
19  
20 **Conners, 3<sup>rd</sup> Edition.**<sup>57</sup> The Conners-3 is a questionnaire which assesses ADHD-related  
21 behaviors in children 3 to 17 years old. We will analyze mean T scores (mean=50, SD=10 for the  
22 standardization sample) for the ADHD Inattentive and ADHD Hyperactive-Impulsive DSM-5  
23 Symptom Scales as well as the ADHD Index for each version (Parent and Teacher). For children  
24 6-11 years old, the Cronbach's alpha coefficients for scores on the scales range from 0.87 to 0.95  
25 for both parent and teacher ratings, indicating satisfactory internal consistency. Test-retest  
26 reliability for the scales ranges from 0.67 to 0.72 for parents and 0.47 to 0.80 for teachers.

27  
28  
29  
30  
31  
32  
33  
34  
35  
36 **Social Responsiveness Scale, Second Edition.**<sup>58</sup> The SRS-2 questionnaire evaluates autism  
37 spectrum symptoms, including those relating to social awareness, social cognition,  
38 communication, social motivation, and autistic traits, in individuals older than 2.5 years. We will  
39 analyze T scores (mean=50, SD=10 for the standardization sample) from both versions (Parent  
40 and Teacher). Ratings show good internal consistency and interrater reliability.  
41  
42  
43  
44  
45  
46  
47  
48  
49  
50  
51  
52  
53  
54  
55  
56  
57  
58  
59  
60

## Running Head: Executive Function Intervention for Children with CHD

**Table 1. Schedule of neurodevelopmental assessment data collection**

|                           | Assessment                                                      | Informant | Baseline | Post-treatment* | Follow-up** |
|---------------------------|-----------------------------------------------------------------|-----------|----------|-----------------|-------------|
| <b>Primary Outcome</b>    | NIH Toolbox List Sorting Working Memory Test                    | Child     | X        | X               | X           |
|                           | NIH Toolbox Cognition Battery                                   | Child     | X        | X               | X           |
| <b>Secondary Outcomes</b> | Behavior Rating Inventory of Executive Function, Second Edition | Parent    | X        | X               | X           |
|                           |                                                                 | Teacher   | X        | X               | X           |
|                           | Conners, Third Edition                                          | Parent    | X        | X               | X           |
|                           |                                                                 | Teacher   | X        | X               | X           |
|                           | Social Responsiveness Scale, Second Edition                     | Parent    | X        | X               | X           |
| Teacher                   |                                                                 | X         | X        | X               |             |

\*Post-treatment (one to two weeks after cessation of intervention and/or 6 to 7 weeks after baseline).

\*\*3-month follow-up (3 months after completion of the intervention and/or 4 to 5 months after baseline).

### Covariate measures

We will investigate cognitive, medical, and sociodemographic patient-specific factors as predictors of response to the intervention, at both post-treatment and 3-month follow-up assessments. The following variables will be investigated: baseline IQ scores on the Wechsler Intelligence Scale for Children, Fifth Edition<sup>59</sup>, and perinatal medical history such as birth weight, gestational age, type of CHD, history of neurological abnormalities, number of open-heart surgeries, intensive care unit length of stay, and total number of hospitalizations.

### Sample size and power considerations

Our specific aims are to determine whether there are significant differences between the intervention and control groups in the changes in scores on the List Sorting Working Memory Test between measurements at baseline and post-treatment (Specific Aim 1) and between baseline and 3-month follow-up (Specific Aim 2). Although this test has a good test-retest

Running Head: Executive Function Intervention for Children with CHD

1  
2  
3 reliability of  $\rho=0.87$ , to be conservative, we will assume a value of  $\rho=0.70$  between  
4  
5 measurements at baseline and post-treatment and between baseline and 3-month follow-up on the  
6  
7 same subject. Given a sample size of 100 subjects,  $\rho=0.70$  for within-subject correlations, and a  
8  
9 two-sided Type I error rate of 5%, we have 81.4% power to detect a mean difference of 0.5 SD  
10  
11 between treatment groups, with a conservative 20% attrition rate (hence, analyzing a minimum  
12  
13 of 80 subjects) in our primary outcome measure. This corresponds to a mean difference of 7.5  
14  
15 units, given an expected SD of 15 for the List Sorting Working Memory Test of the NIH  
16  
17 Toolbox.  
18  
19  
20  
21

22  
23 Among children who receive the Cogmed intervention, we also seek to assess  
24  
25 associations of cognitive, sociodemographic, and medical factors with changes in the scores for  
26  
27 our primary outcome measure (Specific Aim 3). Given a sample size of 50 children randomized  
28  
29 to receive Cogmed intervention and a two-sided Type I error rate of 5%, we have 79.9% power  
30  
31 to detect a correlation of 0.43 (or  $R^2 = 0.43^2 = 0.185$  from a linear regression) between a patient-  
32  
33 specific factor and our primary outcome variable even with a conservative 20% attrition rate  
34  
35 (analyzing a minimum of 40 subjects).  
36  
37  
38

### 39 **Data analysis plan**

40  
41  
42 For Specific Aims 1 and 2, the efficacy of the intervention will be evaluated by  
43  
44 comparing within-subject differences (baseline to post-treatment, baseline to 3-month follow-up,  
45  
46 and, in secondary analyses, post-treatment to 3-month follow-up) across treatment groups using  
47  
48 an intention-to-treat analysis.  
49  
50

51  
52 Descriptive statistics will be calculated, including means, standard deviations, medians,  
53  
54 and interquartile ranges for continuous variables and frequency counts and percentages for  
55  
56  
57  
58  
59

## Running Head: Executive Function Intervention for Children with CHD

1  
2  
3 categorical variables. The primary outcome measure, the List Sorting Working Memory Test of  
4 the NIH Toolbox, and most other study outcomes are continuous variables. T tests and linear  
5 regression will be used to assess differences between the intervention and control groups for  
6 continuous outcomes (i.e., differences in means, 95% CI). Proportions and logistic regression  
7 will be used to examine group differences in binary outcomes (i.e., chi square tests, odds ratios,  
8 95% CI). We expect that randomization will produce balance between treatment groups in terms  
9 of demographic and baseline factors, but we will use regression methods to adjust for any factors  
10 that may be unbalanced. All analyses will be accompanied by graphical exploration of the data  
11 and screening for outlying and influential observations. Data transformations and nonparametric  
12 methods (e.g., Wilcoxon rank sum tests) will be used as appropriate when parametric  
13 assumptions are violated. Primary analyses of treatment group differences will focus on  
14 complete cases. In secondary analyses, we will assume no change over time for subjects who do  
15 not return for their post-treatment assessment (i.e., last value carried forward approach), but we  
16 will also carry out other sensitivity analyses to assess the strength of our findings based on other  
17 missing data assumptions.

18  
19 For Specific Aim 3, we will explore the associations between patient factors and within-  
20 subject differences (baseline to post-treatment, baseline to 3-month follow-up) using correlation  
21 and linear regression methods, including consideration of possible confounding or effect  
22 modification. Because we will be conducting multiple analyses with several predictors and  
23 primary and secondary outcomes in an exploratory fashion, we will interpret results cautiously,  
24 based not only on significance levels ( $p < 0.05$ , two-tailed) but also on the magnitude of  
25 differences, correlations, or regression effects. As appropriate, we will also consider the use of  
26 other statistical methods, such as generalized additive models, partial and sparse partial least  
27

Running Head: Executive Function Intervention for Children with CHD

squares, and family-wise error rates, in our approach. Analyses will be conducted primarily using SAS, Stata, SPSS, and R.

## **ETHICS AND DISSEMINATION**

This study has received full Institutional Review Board (IRB) approval from Boston's Children's Hospital IRB (P00022440) and has also been reviewed and approved by the Human Protection Agency from the United States Department of Defense. Protocol modifications and amendments will be submitted to the ethical committees for approval. This trial has been registered with the American Clinical Trials Registry (NCT03023644). Prior to entering into the trial, all parents or legal guardians and children will give written informed consent or assent to participate. The study results will be disseminated through publications in scientific journals, presentations at scientific conferences, and directly to the families who participated in the study.

## **Discussion**

This article has presented the background and design for a RCT investigating the efficacy of a 5-week working memory intervention for children with CHD who underwent open-heart surgery in infancy. This is the first study to investigate the effects of a neurocognitive intervention targeting EF in school-aged children with CHD. We will evaluate children's cognitive and social outcomes including autism spectrum and ADHD symptoms. Furthermore, the results from this trial will provide information on potential patient-specific factors associated with response to the intervention.

Executive dysfunction may have cascading adverse effects on a myriad of domains ranging from specific neurocognitive abilities to school achievement, social adaptation, and, ultimately, quality of life. Timely prevention and treatment of these issues is a priority in the care

Running Head: Executive Function Intervention for Children with CHD

1  
2  
3 of patients with CHD. If proven effective, this type of neurocognitive intervention could be  
4  
5 implemented in a clinical outpatient practice for patients at increased neurodevelopmental risk.  
6  
7  
8  
9  
10  
11  
12  
13  
14  
15  
16  
17  
18  
19  
20  
21  
22  
23  
24  
25  
26  
27  
28  
29  
30  
31  
32  
33  
34  
35  
36  
37  
38  
39  
40  
41  
42  
43  
44  
45  
46  
47  
48  
49  
50  
51  
52  
53  
54  
55  
56  
57  
58  
59  
60

For peer review only

## Running Head: Executive Function Intervention for Children with CHD

**References**

1. Fyler DC. Report of the New England Regional Infant Cardiac Program. *Pediatrics*. 1980;65:S375-S461.
2. Loffredo C. Epidemiology of cardiovascular malformations: prevalence and risk factors. *Am J Med Genet*. 2000;97:319-25.
3. Ferry PC. Neurologic sequelae of cardiac surgery in children. *Am J Dis Child*. 1987;141:309-12.
4. Marino BS, Lipkin PH, Newburger JW, Peacock G, Gerdes M, Gaynor JW, Mussatto KA, Uzark K, Goldberg CS, Johnson WH, Jr., Li J, Smith SE, Bellinger DC, Mahle WT, American Heart Association Congenital Heart Defects Committee, Council on Cardiovascular Disease in the Young, Council on Cardiovascular Nursing, and Stroke Council. Neurodevelopmental outcomes in children with congenital heart disease: evaluation and management: a scientific statement from the American Heart Association. *Circulation*. 2012;126(9):1143-72.
5. Mahle WT, Tavani F, Zimmerman RA, Nicolson SC, Galli KK, Gaynor JW, Clancy RR, Montenegro LM, Spray TL, Chiavacci RM, Wernovsky G, Kurth CD. An MRI study of neurological injury before and after congenital heart surgery. *Circulation*. 2002;106(Suppl 1):109-14.
6. Miller SP, McQuillen PS, Hamrick S, Xu D, Glidden DV, Charlton N, Karl T, Azakie A, Ferriero DM, Barkovich AJ, Vigneron DB. Abnormal brain development in newborns with congenital heart disease. *N Engl J Med*. 2007;357(19):1928-38.
7. Owen M, Shevell M, Majnemer A, Limperopoulos C. Abnormal brain structure and function in newborns with complex congenital heart defects before open heart surgery: a review of the evidence. *J Child Neurol*. 2011;26(6):743-55.
8. Diamond A. Executive functions. *Annu Rev Psychol*. 2012;64:135.
9. Blair C, Razza RP. Relating effortful control, executive function, and false belief understanding to emerging math and literacy ability in kindergarten. *Child Dev*. 2007;78(2):647-63.
10. Diamond A, Barnett WS, Thomas J, Munro S. Preschool program improves cognitive control. *Science*. 2007;318(5855):1387-8.
11. Bull R, Scerif G. Executive functioning as a predictor of children's mathematics ability: inhibition, switching, and working memory. *Dev Neuropsychol*. 2001;19(3):273-93.
12. Biederman J, Monuteaux MC, Doyle AE, Seidman LJ, Wilens TE, Ferrero F, Morgan CL, Faraone SV. Impact of executive function deficits and attention-deficit/hyperactivity disorder (ADHD) on academic outcomes in children. *J Consult Clin Psychol*. 2004;72(5):757-66.
13. Espy KA, McDiarmid MM, Cwik MF, Stalets MM, Hamby A, Senn TE. The contribution of executive functions to emergent mathematic skills in preschool children. *Dev Neuropsychol*. 2004;26(1):465-86.
14. Diamond A. Normal development of prefrontal cortex from birth to young adulthood: cognitive functions, anatomy, and biochemistry. In: Stuss D, Knight, RT, editor. *Principles of Frontal Lobe Function*. New York, NY: Oxford University Press; 2002. p. 466-503.



## Running Head: Executive Function Intervention for Children with CHD

15. Barkley RA. Distinguishing sluggish cognitive tempo from ADHD in children and adolescents: executive functioning, impairment, and comorbidity. *J Clin Child Adolesc Psychol.* 2013;42(2):161-73.
16. Lai MC, Lombardo MV, Baron-Cohen S. Autism. *Lancet.* 2014;383(9920):896-910.
17. Pellicano E. Individual differences in executive function and central coherence predict developmental changes in theory of mind in autism. *Dev Psychol.* 2010;46(2):530-44.
18. Baler RD, Volkow ND. Drug addiction: the neurobiology of disrupted self-control. *Trends Mol Med.* 2006;12(12):559-66.
19. Miller AL, Lee HJ, Lumeng JC. Obesity-associated biomarkers and executive function in children. *Pediatr Res.* 2015;77(1-2):143-7.
20. Levy S, Katusic SK, Colligan RC, Weaver AL, Killian JM, Voigt RG, Barbaresi WJ. Childhood ADHD and risk for substance dependence in adulthood: a longitudinal, population-based study. *PLoS One.* 2014;9(8):e105640.
21. Calderon J, Jambaque I, Bonnet D, Angeard N. Executive functions development in 5- to 7-year-old children with transposition of the great arteries: a longitudinal study. *Dev Neuropsychol.* 2014;39(5):365-84.
22. Bellinger DC, Wypij D, Rivkin MJ, DeMaso DR, Robertson RL, Jr., Dunbar-Masterson C, Rappaport LA, Wernovsky G, Jonas RA, Newburger JW. Adolescents with d-transposition of the great arteries corrected with the arterial switch procedure: neuropsychological assessment and structural brain imaging. *Circulation.* 2011;124(12):1361-9.
23. Calderon J, Bonnet D, Courtin C, Concordet S, Plumet MH, Angeard N. Executive function and theory of mind in school-aged children after neonatal corrective cardiac surgery for transposition of the great arteries. *Dev Med Child Neurol.* 2010;52(12):1139-44.
24. Calderon J, Angeard N, Moutier S, Plumet MH, Jambaque I, Bonnet D. Impact of prenatal diagnosis on neurocognitive outcomes in children with transposition of the great arteries. *J Pediatr.* 2012;161(1):94-8 e1.
25. Bellinger DC, Wypij D, duDuplessis AJ, Rappaport LA, Jonas RA, Wernovsky G, Newburger JW. Neurodevelopmental status at eight years in children with dextro-transposition of the great arteries: the Boston Circulatory Arrest Trial. *J Thorac Cardiovasc Surg.* 2003;126(5):1385-96.
26. Bellinger DC, Rivkin MJ, Demaso D, Robertson RL, Stopp C, Dunbar-Masterson C, Wypij D, Newburger JW. Adolescents with tetralogy of Fallot: neuropsychological assessment and structural brain imaging. *Cardiol Young.* 2015;25:338-47.
27. Miatton M, De Wolf D, Francois K, Thiery E, Vingerhoets G. Neuropsychological performance in school-aged children with surgically corrected congenital heart disease. *J Pediatr.* 2007;151(1):73-78.
28. Hovels-Gurich HH, Konrad K, Skorzenski D, Herpertz-Dahlmann B, Messmer BJ, Seghaye MC. Attentional dysfunction in children after corrective cardiac surgery in infancy. *Ann Thorac Surg.* 2007;83(4):1425-30.
29. Gaynor JW, Gerdes M, Nord AS, Bernbaum J, Zackai E, Wernovsky G, Clancy RR, Heagerty PJ, Solot CB, McDonald-McGinn D, Jarvik GP. Is cardiac diagnosis a predictor of neurodevelopmental outcome after cardiac surgery in infancy? *J Thorac Cardiovasc Surg.* 2010;140(6):1230-7.



## Running Head: Executive Function Intervention for Children with CHD

30. Cassidy AR, White MT, DeMaso DR, Newburger JW, Bellinger DC. Executive function in children and adolescents with critical cyanotic congenital heart disease. *J Int Neuropsychol Soc.* 2015;21(1):34-49
31. Neal AE, Stopp C, Wypij D, Bellinger DC, Dunbar-Masterson C, DeMaso DR, Newburger JW. Predictors of health-related quality of life in adolescents with tetralogy of Fallot. *J Pediatr.* 2015;166(1):132-8.
32. Calderon J, Bellinger DC. Executive function deficits in congenital heart disease: why is intervention important? *Cardiol Young.* 2015;25(7):1238-46.
33. Shillingford AJ, Glanzman MM, Ittenbach RF, Clancy RR, Gaynor JW, Wernovsky G. Inattention, hyperactivity, and school performance in a population of school-age children with complex congenital heart disease. *Pediatrics.* 2008;121(4):e759-e67.
34. Hansen E, Poole TA, Nguyen V, Lerner M, Wigal T, Shannon K, Wigal SB, Batra AS. Prevalence of ADHD symptoms in patients with congenital heart disease. *Pediatr Int.* 2012;54(6):838-43.
35. DeMaso DR, Labella M, Taylor GA, Forbes PW, Stopp C, Bellinger DC, Rivkin MJ, Wypij D, Newburger JW. Psychiatric disorders and function in adolescents with d-transposition of the great arteries. *J Pediatr.* 2014;165:760-6.
36. Newburger JW, Sleeper LA, Bellinger DC, Goldberg CS, Tabbutt S, Lu M, Mussatto KA, Williams IA, Gustafson KE, Mital S, Pike N, Sood E, Mahle WT, Cooper DS, Dunbar-Masterson C, Krawczeski CD, Lewis A, Menon SC, Pemberton VL, Ravishankar C, Atz TW, Ohye RG, Gaynor JW. Early developmental outcome in children with hypoplastic left heart syndrome and related anomalies: the single ventricle reconstruction trial. *Circulation.* 2012;125(17):2081-91.
37. Yamada DC, Porter AA, Conway JL, LeBlanc JC, Shea SE, Hancock-Friesen CL, Warren AE. Early repair of congenital heart disease associated with increased rate of attention deficit hyperactivity disorder symptoms. *Can J Cardiol.* 2013;29(12):1623-8.
38. Sistino JJ, Atz AM, Simpson KN, Ellis C, Ikonomidis JS, Bradley SM. The prevalence of attention deficit/hyperactivity disorder following neonatal aortic arch repair. *Cardiol Young.* 2015;25(4):663-9.
39. von Rhein M, Buchmann A, Hagmann C, Huber R, Klaver P, Knirsch W, Latal B. Brain volumes predict neurodevelopment in adolescents after surgery for congenital heart disease. *Brain.* 2014;137(Pt 1):268-76.
40. Schaefer C, von Rhein M, Knirsch W, Huber R, Natalucci G, Caflisch J, Landolt MA, Latal B. Neurodevelopmental outcome, psychological adjustment, and quality of life in adolescents with congenital heart disease. *Dev Med Child Neurol.* 2013;55(12):1143-9.
41. Klingberg T, Fernell E, Olesen PJ, Johnson M, Gustafsson P, Dahlstrom K, Gillberg CG, Forssberg H, Westerberg H. Computerized training of working memory in children with ADHD--a randomized, controlled trial. *J Am Acad Child Adolesc Psychiatry.* 2005;44(2):177-86.
42. Klingberg T, Forssberg H, Westerberg H. Training of working memory in children with ADHD. *J Clin Exp Neuropsychol.* 2002;24(6):781-91.
43. Holmes J, Gathercole SE, Dunning DL. Adaptive training leads to sustained enhancement of poor working memory in children. *Dev Sci.* 2009;12(4):F9-15.
44. Holmes JG, S.E. Taking working memory training from the laboratory into schools. *Educational Psychology: An International Journal of Experimental Educational Psychology.* 2014;34(4):440.

## Running Head: Executive Function Intervention for Children with CHD

- 1
  - 2
  - 3
  - 4
  - 5
  - 6
  - 7
  - 8
  - 9
  - 10
  - 11
  - 12
  - 13
  - 14
  - 15
  - 16
  - 17
  - 18
  - 19
  - 20
  - 21
  - 22
  - 23
  - 24
  - 25
  - 26
  - 27
  - 28
  - 29
  - 30
  - 31
  - 32
  - 33
  - 34
  - 35
  - 36
  - 37
  - 38
  - 39
  - 40
  - 41
  - 42
  - 43
  - 44
  - 45
  - 46
  - 47
  - 48
  - 49
  - 50
  - 51
  - 52
  - 53
  - 54
  - 55
  - 56
  - 57
  - 58
  - 59
  - 60
45. Westerberg H, Klingberg T. Changes in cortical activity after training of working memory--a single-subject analysis. *Physiol Behav.* 2007;92(1-2):186-92.
46. Brehmer Y, Westerberg H, Backman L. Working-memory training in younger and older adults: training gains, transfer, and maintenance. *Front Hum Neurosci.* 2012;6:63.
47. Beck SJ, Hanson CA, Puffenberger SS, Benninger KL, Benninger WB. A controlled trial of working memory training for children and adolescents with ADHD. *J Clin Child Adolesc Psychol.* 2010;39(6):825-36.
48. Gropper RJ, Gotlieb H, Kronitz R, Tannock R. Working memory training in college students with ADHD or LD. *J Atten Disord.* 2014;18(4):331-45.
49. Johansson B, Tornmalm M. Working memory training for patients with acquired brain injury: effects in daily life. *Scand J Occup Ther.* 2012;19(2):176-83.
50. Lundqvist A, Grundstrom K, Samuelsson K, Ronnberg J. Computerized training of working memory in a group of patients suffering from acquired brain injury. *Brain Inj.* 2010;24(10):1173-83.
51. Bergman Nutley S, Soderqvist S, Bryde S, Thorell LB, Humphreys K, Klingberg T. Gains in fluid intelligence after training non-verbal reasoning in 4-year-old children: a controlled, randomized study. *Dev Sci.* 2011;14(3):591-601.
52. Thorell LB, Lindqvist S, Bergman Nutley S, Bohlin G, Klingberg T. Training and transfer effects of executive functions in preschool children. *Dev Sci.* 2009;12(1):106-13.
53. Grunewaldt KH, Lohaugen GC, Austeng D, Brubakk AM, Skranes J. Working memory training improves cognitive function in VLBW preschoolers. *Pediatrics.* 2013;131(3):e747-54.
54. Lohaugen GC, Antonsen I, Haberg A, Gramstad A, Vik T, Brubakk AM, Skranes J. Computerized working memory training improves function in adolescents born at extremely low birth weight. *J Pediatr.* 2011;158(4):555-61 e4
55. Zelazo PD, Anderson JE, Richler J, Wallner-Allen K, Beaumont JL, Weintraub S. II. NIH Toolbox Cognition Battery (CB): measuring executive function and attention. *Monogr Soc Res Child Dev.* 2013;78(4):16-33.
56. Gioia GA, Isquith PK, Guy SC, Kenworthy L. Behavior rating inventory of executive function. *Child Neuropsychol.* 2000;6(3):235-8.
57. Conners CK. *Manual for the Conners Rating Scales - Revised.* North Tonawanda, NY; MHS Assessments; 1997.
58. Constantino JN, Davis SA, Todd RD, Schindler MK, Gross MM, Brophy SL, Metzger LM, Shoushtari CS, Splinter R, Reich W. Validation of a brief quantitative measure of autistic traits: comparison of the social responsiveness scale with the autism diagnostic interview-revised. *J Autism Dev Disord.* 2003;33(4):427-33.
59. Wechsler D. *Wechsler Intelligence Scale for Children - Fifth Edition.* 5th ed: Psychological Corporation, Inc.; 2014.

Running Head: Executive Function Intervention for Children with CHD

1  
2  
3 **Contributors** JC, DCB, and JWN are the primary investigators and together with DW designed  
4 and established this research study. JC and JWN were responsible for ethics applications and  
5  
6 and established this research study. JC and JWN were responsible for ethics applications and  
7  
8 reporting. JC, DCB, CH, and AL are responsible for data collection and implementation of the  
9  
10 intervention. JC will take lead roles on preparation for publication of the clinical outcomes of the  
11  
12 study. JWN, DCB, DW, CS, CH, and AL will contribute to the preparation of publications  
13  
14 within their respective fields of expertise. DW and CS will take on a lead role of the statistical  
15  
16 analysis for the study. JC drafted the final version of this manuscript. All authors critically  
17  
18 reviewed and approved the final version. All data from this study will be submitted to peer-  
19  
20 review journals and for presentation at national and international scientific conferences.  
21  
22

23  
24 **Funding** This research was funded by the United States Department of Defense, Clinical Trials  
25  
26 awards (grant number W81XWH-16-1-0741).  
27

28  
29 **Competing interests** No competing interests are reported. Authors do not have any commercial  
30  
31 or scientific affiliation with Pearson, Inc., distributor of Cogmed Working Memory Training.  
32

33  
34 **Ethics approval** Full ethical approval for this study has been obtained by the Boston Children's  
35  
36 Hospital's Institutional Review Board (IRB) (IRB number P00022440) and has also been  
37  
38 reviewed and approved by the Human Protection Agency from the United States Department of  
39  
40 Defense. All parent/guardians and children will give written informed consent or assent to  
41  
42 participate prior to entering into the trial.  
43  
44  
45  
46  
47  
48  
49  
50  
51  
52  
53  
54  
55  
56  
57  
58  
59  
60

## Running Head: Executive Function Intervention for Children with CHD

1  
2  
3  
4  
5  
6 Figure 1. Flowchart of trial design (ND=neurodevelopmental)  
7  
8  
9  
10  
11  
12  
13  
14  
15  
16  
17  
18  
19  
20  
21  
22  
23  
24  
25  
26  
27  
28  
29  
30  
31  
32  
33  
34  
35  
36  
37  
38  
39  
40  
41  
42  
43  
44  
45  
46  
47  
48  
49  
50  
51  
52  
53  
54  
55  
56  
57  
58  
59  
60

For peer review only

1  
2  
3  
4  
5  
6  
7  
8  
9  
10  
11  
12  
13  
14  
15  
16  
17  
18  
19  
20  
21  
22  
23  
24  
25  
26  
27  
28  
29  
30  
31  
32  
33  
34  
35  
36  
37  
38  
39  
40  
41  
42  
43  
44  
45  
46  
47  
48  
49  
50  
51  
52  
53  
54  
55  
56  
57  
58  
59  
60

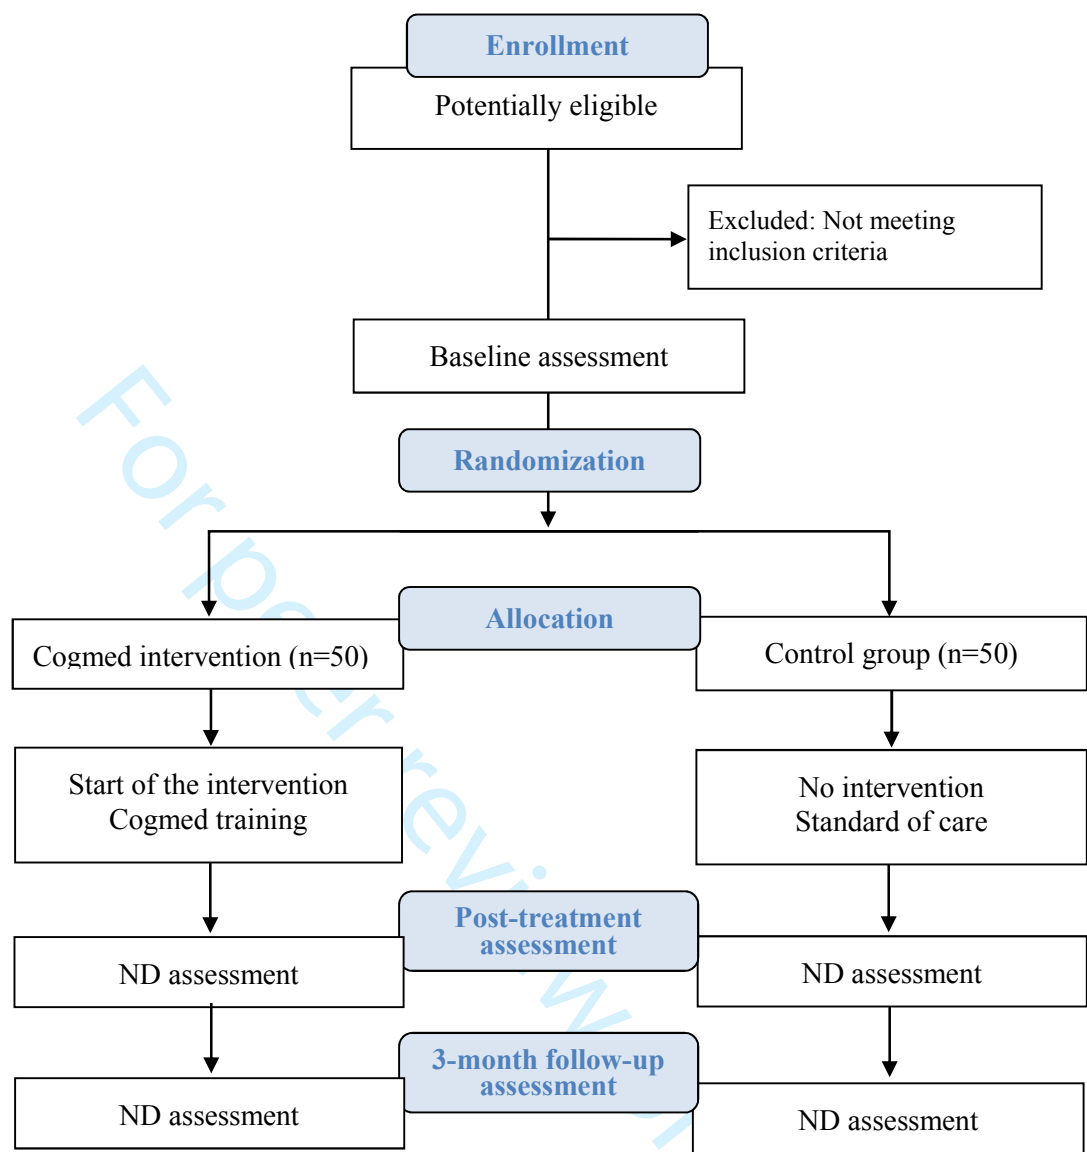

# BMJ Open

## Improving Neurodevelopmental Outcomes in Children with Congenital Heart Disease: Protocol for a Randomized Controlled Trial of Working Memory Training

|                                 |                                                                                                                                                                                                                                                                                                                                                                                                                                                                                                                                                                                                                            |
|---------------------------------|----------------------------------------------------------------------------------------------------------------------------------------------------------------------------------------------------------------------------------------------------------------------------------------------------------------------------------------------------------------------------------------------------------------------------------------------------------------------------------------------------------------------------------------------------------------------------------------------------------------------------|
| Journal:                        | <i>BMJ Open</i>                                                                                                                                                                                                                                                                                                                                                                                                                                                                                                                                                                                                            |
| Manuscript ID                   | bmjopen-2018-023304.R1                                                                                                                                                                                                                                                                                                                                                                                                                                                                                                                                                                                                     |
| Article Type:                   | Protocol                                                                                                                                                                                                                                                                                                                                                                                                                                                                                                                                                                                                                   |
| Date Submitted by the Author:   | 20-Jul-2018                                                                                                                                                                                                                                                                                                                                                                                                                                                                                                                                                                                                                |
| Complete List of Authors:       | Calderon, Johanna; Boston Children's Hospital, Psychiatry; Harvard Medical School, Psychiatry<br>Bellinger, David; Children's Hospital Boston, Psychiatry; Harvard Medical School, Psychiatry<br>Hartigan, Catherine; Children's Hospital Boston, Cardiology<br>Lord, Alison; Children's Hospital Boston, Cardiology<br>Stopp, Christian; Children's Hospital Boston, Cardiology<br>Wypij, David ; Children's Hospital Boston, Cardiology; Harvard University T H Chan School of Public Health, Department of Biostatistics<br>Newburger, Jane; Children's Hospital Boston, Cardiology; Harvard Medical School, Pediatrics |
| <b>Primary Subject Heading</b>: | Paediatrics                                                                                                                                                                                                                                                                                                                                                                                                                                                                                                                                                                                                                |
| Secondary Subject Heading:      | Cardiovascular medicine, Mental health                                                                                                                                                                                                                                                                                                                                                                                                                                                                                                                                                                                     |
| Keywords:                       | Working Memory, Congenital heart disease < CARDIOLOGY, Executive Function Intervention, Cogmed, Infant heart surgery                                                                                                                                                                                                                                                                                                                                                                                                                                                                                                       |
|                                 |                                                                                                                                                                                                                                                                                                                                                                                                                                                                                                                                                                                                                            |

SCHOLARONE™  
Manuscripts

Running Head: Executive Function Intervention for Children with CHD

1  
2  
3  
4  
5  
6  
7  
8 **Improving Neurodevelopmental Outcomes in Children with Congenital Heart Disease:**  
9  
10 **Protocol for a Randomized Controlled Trial of Working Memory Training**  
11  
12  
13  
14  
15  
16  
17  
18

19 Johanna Calderon<sup>1,2</sup>, PhD, David C. Bellinger,<sup>1,2</sup> PhD, MSc, Catherine Hartigan<sup>3</sup>, BA,  
20  
21 Alison Lord<sup>3</sup>, BS, Christian Stopp<sup>3</sup>, MS, David Wypij<sup>3,4</sup>, PhD,  
22  
23 and Jane W. Newburger<sup>3,5</sup>, MD, MPH  
24  
25  
26  
27  
28  
29  
30

31 <sup>1</sup> Department of Psychiatry, Boston Children's Hospital, Boston, MA

32 <sup>2</sup> Department of Psychiatry, Harvard Medical School, Boston, MA

33 <sup>3</sup> Department of Cardiology, Boston Children's Hospital, Boston, MA

34 <sup>4</sup> Department of Biostatistics, Harvard T.H. Chan School of Public Health, Boston, MA

35 <sup>5</sup> Department of Pediatrics, Harvard Medical School, Boston, MA  
36  
37  
38  
39  
40

41 Corresponding author: Dr. Johanna Calderon, Department of Psychiatry, Boston Children's

42 Hospital, 21 Autumn Street, AT110.3. Boston, MA 02115. E-mail:

43  
44 [johanna.calderon@childrens.harvard.edu](mailto:johanna.calderon@childrens.harvard.edu)  
45  
46  
47  
48  
49

50 Word count (abstract): 320

51  
52 Word Count (article body): 4804  
53  
54  
55  
56  
57  
58  
59  
60

Running Head: Executive Function Intervention for Children with CHD

## Abstract

**Introduction:** Executive function (EF) impairments are among the most prevalent neurodevelopmental morbidities in youth with congenital heart disease (CHD). To date, no studies have been undertaken to investigate the efficacy of cognitive interventions aimed at improving EF outcomes in children with CHD.

**Methods and analysis:** This is a single center, single-blinded, two-arm randomized controlled trial to test the efficacy of Cogmed Working Memory Training (Cogmed) *versus* standard of care in children with CHD after open-heart surgery in infancy. Participants will consist of 100 children with CHD aged 7-12 years who underwent open-heart surgery before the age of 12 months. Participants are randomly allocated to either an intervention group including training on the home-based Cogmed intervention for a duration of approximately 5 weeks or a control group who receive the standard of care for children with CHD. We seek to evaluate the efficacy of Cogmed at post-treatment and 3-months after completion of the intervention. Baseline, post-treatment, and 3-month follow-up assessments will include specific measures of EF, cognitive and social functioning, and ADHD symptoms. The primary outcome of this study is the change in standardized mean score on the List Sorting Working Memory test from the NIH Toolbox for the Assessment of Neurological and Behavioral Function. Secondary outcomes include measures of social skills, inhibitory control, cognitive flexibility, and behavioral EF as well as ADHD symptoms as measured by the Behavior Rating Inventory of Executive Function, Second Edition and the Conners 3<sup>rd</sup> Edition. The efficacy of the intervention will be evaluated by comparing within-subject differences (baseline to post-treatment, baseline to 3-month follow-up) between the two groups using an intention-to-treat analysis.

**Ethics and dissemination:** This study has received full Institutional Review Board (IRB) approval from Boston's Children's Hospital IRB (P00022440) and has also been reviewed and approved by the Human Protection Agency from the US Department of Defense. The results will be published in peer-review journals and presented at scientific conferences.

**Trial Registration Number:** NCT03023644



Running Head: Executive Function Intervention for Children with CHD

### Strengths and limitations of this study

- To our knowledge, this is the first randomized controlled trial (RCT) investigating the efficacy of an executive function intervention in improving outcomes for children with congenital heart disease (CHD).
- The home-based Cogmed Working Memory Training (Cogmed) is among the most widely-used evidence-based programs targeting core executive function skills and will directly address the most frequent neurodevelopmental impairment for children with critical CHD that strongly impacts their ability to succeed in academic and social environments.
- This intervention is individually adapted to each child's own executive function level, which ensures an optimal level of performance throughout the sessions.
- As a home-based intervention, Cogmed reduces the need for hospital-based treatment visits, potentially reducing the burden for families of children with chronic health conditions such as critical CHD.
- This RCT includes computerized individual measures of neurodevelopment and parent- and teacher-rating scales of behavioral and social outcomes as well as collection of patient-specific factors to investigate their potential relationship with response to treatment.
- This is a phase II RCT to provide the first proof of concept that a cognitive intervention can improve outcomes in children with CHD. As such, it is single blinded (participants know their treatment group) and has a relatively short duration of follow-up (3 months).

Running Head: Executive Function Intervention for Children with CHD

## INTRODUCTION

Congenital heart lesions are among the most common birth defects,<sup>1-2</sup> with approximately 1% of infants born with congenital heart disease (CHD). Of these, more than one-third will present with critical CHD, most broadly defined as forms of CHD requiring surgical or catheter interventions or resulting in death in the first year of life.<sup>1,3</sup> Advances in prenatal diagnosis as well as medical and surgical care have reduced mortality rates for all forms of CHD. However, evidence of central nervous system damage, including delayed brain maturation *in utero* and abnormal brain metabolism and microstructure associated with hypoxic-ischemic injury, has been reported by a wealth of studies of critical CHD.<sup>4-7</sup> A dramatic increase in the population of survivors of infant heart surgery has been accompanied by the increased recognition of their long-term postoperative morbidities. Neurodevelopmental disabilities, particularly executive function (EF) impairments, are currently the most prevalent long-term morbidity in the population with CHD.<sup>4</sup> EF refers to a set of higher-order neurocognitive abilities that serve to coordinate and organize actions towards a goal, allowing the individual to adapt to new or complex situations.<sup>8</sup> Impairments in EF manifest as behavioral dysregulation and attention problems, impaired working memory (i.e., the ability to keep information in mind and manipulate it over a short period of time), and problems with organization and planning abilities. EF is more strongly associated with school readiness than is IQ, predicts both mathematics and reading competence throughout the school years<sup>8-10</sup> and is strongly associated with social cognition (i.e., decoding other people's mental and emotional states and responding to rapid-paced social interactions).<sup>9</sup>

Executive dysfunction can profoundly impact all dimensions of a child's development<sup>11-14</sup> and is a core feature of attention deficit hyperactivity disorder (ADHD)<sup>15</sup> and autism spectrum

## Running Head: Executive Function Intervention for Children with CHD

1  
2  
3 symptoms.<sup>16-17</sup> If untreated, deficits in EF may also predispose individuals to later addiction,<sup>18</sup>  
4  
5 eating disorders and obesity,<sup>19</sup> and risk-taking behaviors.<sup>20</sup> These adverse sequelae may carry  
6  
7 profound implications for the educational achievement, future employment, and quality of life of  
8  
9 individuals with CHD.<sup>4</sup>  
10  
11  
12  
13

### EF in critical CHD

14  
15  
16  
17 Impairments in EF are at the heart of the neurodevelopmental phenotype associated with  
18  
19 critical CHD after open-heart surgery.<sup>21-34</sup> EF deficits in children with CHD were first reported  
20  
21 in school-aged children with dextro-transposition of the great arteries (d-TGA).<sup>25</sup> Standardized  
22  
23 neuropsychological testing showed that patients with d-TGA had substantial difficulty planning  
24  
25 and alternating between tasks, which suggested impairments in cognitive flexibility and working  
26  
27 memory as well as deficits in planning and sustained attention. On the Behavior Rating  
28  
29 Inventory of Executive Function (BRIEF), parents and teachers of adolescents with CHD  
30  
31 reported significant difficulties, particularly with regard to working memory.<sup>22</sup> Compared to  
32  
33 normative values, parents' ratings were worse by ~0.5 SD and those of teachers by ~1 SD,  
34  
35 suggesting not only statistically significant but clinically meaningful impairments. More recent  
36  
37 findings also reported specific EF impairments in preschool and school-aged children with d-  
38  
39 TGA.<sup>21,23-24</sup> In particular, children had important difficulties in behavioral regulation and  
40  
41 cognitive control of attention, and they had worse performances on verbal and visual working  
42  
43 memory tasks. Consistent findings have been reported by studies including children with other  
44  
45 types of critical CHD such as tetralogy of Fallot<sup>28</sup> or single ventricle physiology requiring the  
46  
47 Fontan operation.<sup>29</sup> Finally, EF impairments have been associated with worse psychosocial  
48  
49  
50  
51  
52  
53  
54  
55  
56  
57  
58  
59  
60

Running Head: Executive Function Intervention for Children with CHD

health status and worse quality of life in youth with critical CHD,<sup>31</sup> highlighting the potential impact of long-term executive dysfunction on mental health in CHD.<sup>32</sup>

### **Working memory intervention for children with CHD**

The American Heart Association (AHA) recommends routine neurodevelopmental screening of all CHD survivors.<sup>4</sup> A burgeoning literature documents the prevalence and importance of impaired EF and ADHD in CHD survivors,<sup>21-40</sup> and brain imaging studies have provided key information on the underlying disturbances in brain structure and microstructure in patients with CHD.<sup>5-7</sup> Yet to date, no trials have been undertaken to test interventions targeting EF and attention deficits in the CHD population.<sup>34</sup>

Cogmed Working Memory Training (Cogmed) is the most widely used computerized evidence-based intervention that targets EF, specifically providing intensive structured training of working memory.<sup>41-54</sup> It has been shown to improve executive performance in several clinical and non-clinical pediatric populations, including children with ADHD,<sup>41-42;46-47</sup> low working memory and low achievement,<sup>43-44</sup> and children who were born preterm or extremely low-birth weight.<sup>53-54</sup> Unlike other hospital- or laboratory-based interventions, Cogmed can be implemented as a home-based intervention for children. Studies using Cogmed have shown that subjects demonstrate the ability to transfer skills to non-trained tests of working memory as well as to tasks that involve similar processes, including attention, inhibition, and non-verbal reasoning.<sup>51-53</sup> The positive effect of training has been observed on parental ratings of inattention, including the DSM-IV Parent Rating Scale, ADHD-RS-IV, BRIEF, and Conners' Parent Rating Scale. Sustained improvements in behavior as measured by rating scales have also been observed in ADHD,<sup>48</sup> brain injury,<sup>49-50</sup> and non-clinical groups.<sup>51-52</sup>

## Running Head: Executive Function Intervention for Children with CHD

1  
2  
3  
4  
5  
6  
7  
8  
9  
10  
11  
12  
13  
14  
15  
16  
17  
18  
19  
20  
21  
22  
23  
24  
25  
26  
27  
28  
29  
30  
31  
32  
33  
34  
35  
36  
37

In summary, several randomized controlled trials evaluating the use of Cogmed in healthy children<sup>44; 51-52</sup> and in children with various conditions<sup>41-42;47;53-54</sup> have demonstrated that this neurocognitive intervention produces significant generalized and sustained enhancement on measures of EF, and also on everyday life learning and behavioral skills. It is proposed that training working memory using Cogmed is a promising intervention for school-aged children with critical CHD because: (1) it addresses the most frequent neurodevelopmental morbidities that strongly impact the ability to succeed in academic and social environments; (2) it allows for intensive and structured practice of targeted skills, with possible transfer to other neurodevelopmental domains; (3) it is individually adapted to each child's own EF levels, which ensures an optimal level of performance throughout the sessions; (4) it is closely monitored, and various parameters of the child's performance are systematically recorded (e.g., correct answers, speed at which tasks are completed); (5) it is child-friendly and rewarding, which facilitates children's compliance; and, finally, but importantly (6) as a home-based intervention, it reduces the need for hospital/clinic-based visits and multiple costs of individual therapy, potentially reducing the burden for families of children with chronic health conditions such as critical CHD.

38  
39  
40  
41  
42  
43  
44  
45  
46  
47  
48  
49  
50  
51  
52  
53  
54  
55  
56  
57  
58  
59  
60

In this project, we conduct a randomized controlled trial (RCT) to provide the first proof-of-concept that Cogmed intervention improves neurodevelopmental outcomes in children with CHD, and that the improvements persist to 3 months. We will enroll children with CHD who underwent infant open-heart surgery as this population corresponds to the highest risk category for developmental disorders and disabilities as stated in the AHA guidelines (Class I; Level of Evidence A).<sup>4</sup> We propose to determine immediate and 3-month post-treatment effects on both laboratory-based tests and ecological measures of children's EF, ADHD, and social difficulties

Running Head: Executive Function Intervention for Children with CHD

in everyday life. Our study will also provide insight into factors that are associated with response to treatment, identifying children who may be most likely to benefit from the intervention.

### **Aims and hypotheses**

Specific Aim 1: To evaluate the immediate efficacy of home-based Cogmed intervention for neurodevelopmental outcomes in children with CHD. We hypothesize that children who receive the Cogmed intervention, compared with controls receiving standard of care, will display greater improvement from baseline to post-treatment assessment in EF and social development, and greater reduction in symptoms of ADHD.

Our primary outcome measure will be the change in standardized mean score on the working memory test from the National Institutes of Health Toolbox for the Assessment of Neurological and Behavioral Function (NIH Toolbox)<sup>55</sup> from baseline to post-treatment. Secondary outcomes include changes in standardized mean scores on tests of cognitive flexibility, attention, inhibitory control, and speed of processing from the NIH Toolbox; the Global Executive Composite from the Behavior Rating Inventory of Executive Function, 2<sup>nd</sup> Edition (BRIEF-2)<sup>56</sup>, the Global Index and the ADHD Index from the Conners 3<sup>rd</sup> Edition (Conners-3)<sup>57</sup>, and the Social Responsiveness Scale, 2<sup>nd</sup> Edition (SRS-2).<sup>58</sup>

Specific Aim 2: To assess the effects of the Cogmed intervention at 3-month follow-up. We predict that significant gains in neurodevelopmental and behavioral outcomes will persist 3 months after cessation of intervention for children who received Cogmed as compared to controls.

Running Head: Executive Function Intervention for Children with CHD

The primary and secondary outcomes will be the same as those in Specific Aim 1, except that the change in scores will be from baseline to 3-month follow-up (i.e., approximately 3 months after the last Cogmed session).

Specific Aim 3: To explore cognitive, medical, and sociodemographic factors associated with changes in neurodevelopmental and behavioral scores for children who received Cogmed intervention.

## METHODS AND ANALYSIS

### Study design

This is a single center, single-blinded, two-arm RCT to test the efficacy of Cogmed intervention *versus* standard of care in children with CHD after neonatal and/or infant open-heart surgery (n=50 in each group). All eligible subjects undergo a baseline neurodevelopmental assessment and then are randomly assigned to either the standard home-based Cogmed intervention or to a control group receiving the standard of care for children with CHD. All participants will undergo a post-treatment and a 3-month follow-up assessment. All investigators collecting outcome data are blinded to patients' group assignment (Cogmed intervention *versus* standard of care) and to medical and surgical histories. For children assigned to the Cogmed group, post-treatment assessments are performed one to two weeks after the end of the intervention (i.e., approximately 7-8 weeks after baseline assessment) and follow-up will be performed 3 months after the end of the intervention (i.e., approximately 5 months after baseline assessment). For children in the control group, post-treatment and 3-month follow-up assessments are performed approximately 7-8 weeks and 5 months after baseline assessment, respectively.

Running Head: Executive Function Intervention for Children with CHD

## Participants and recruitment

Participants are included if they meet the following criteria: (1) diagnosis of CHD requiring at least one open-heart surgery before one year of age; (2) age between 7 and 12 years at baseline assessment; (3)  $\geq 6$  months post cardiac surgery; (4) had received cardiovascular care at Boston Children's Hospital; (5) English or Spanish speaking; (6) informed consent from parent/guardian as well as assent of the child. Exclusion criteria will be: (1) diagnosed chromosomal anomalies and/or genetic syndromes; (2) severe physical and/or sensory impairments (hearing, visual, or psychomotor) that would prevent the use of the computerized program; (3) confirmed diagnosis of an autism spectrum disorder and/or severe developmental or intellectual disorder that would prevent successful completion of the planned study testing; (4) placement in a separate classroom for severe sensory, motor, language or other developmental disability receiving individual support; (5) scheduled to undergo major cardiac interventions in the 6 months following enrollment; (6) received, receiving, or scheduled to receive Cogmed or any other computerized behavioral training program targeting EF or ADHD. We will not exclude children who underwent multiple heart or other surgeries, children with a pre-existing neurological history (e.g., epilepsy, stroke) or with a history of a concurrent diagnosis of ADHD (treated or untreated). Rather, we will account for these factors in the data analysis.

Eligible children living in the United States are recruited through patient databases of Boston Children's Hospital Cardiology Clinic and affiliated New England medical centers. Families are invited to participate in the study via a mail packet and follow-up phone call. Flyers and study brochures are displayed in Boston Children's Hospital Cardiology Clinic and affiliated medical centers as well as in some local advocacy parent organizations. Participants are assessed for eligibility and enrolled by a study coordinator and a research nurse. Informed consent and



Running Head: Executive Function Intervention for Children with CHD

assent from the child are obtained by a study coordinator or a research neuropsychologist before the baseline assessment at the hospital.

### **Patient and Public Involvement**

Patients, patient/family advocacy groups, or the public were not involved in the design, recruitment and conduct of this study. Participants were informed of the burden of the intervention and the option to stop at any time point. All eligible patients completing our study will receive an individual report of the baseline assessment as well as a general report on study results for the group with CHD when data analyses are finalized.

### **Randomization and stratification**

All eligible subjects undergo a baseline neurodevelopmental assessment ([Figure 1](#)) and then are randomly assigned to either the standard home-based Cogmed intervention group or to a control group (standard of care). Allocations are assigned using a computerized system only seen by the research assistant or study coordinator after confirming all eligibility criteria and consent. Subjects will be assigned in the order in which they are enrolled into the study. Randomization is done by computerized permuted blocks design with blocks of varying sizes. Once a subject has been assigned to a group, he/she will remain in the same trial arm for the duration of the study. The randomization scheme involves two stratification factors: type of CHD (univentricular or biventricular) and baseline level of EF (a score  $<85$  or  $\geq 85$  on the working memory test from the NIH Toolbox). Figure 1 shows the flowchart of the trial design.

### **Intervention group: Home-based Cogmed Working Memory Training**

Children randomly assigned to receive the Cogmed intervention will complete the standard home-based format of the program, Cogmed RM, for children aged 7 years and older.

## Running Head: Executive Function Intervention for Children with CHD

1  
2  
3 The training program contains 12 different neurocognitive tasks. All tasks are adaptive, i.e., task  
4 complexity levels are automatically adjusted to match each child's working memory capacity.  
5  
6 Tasks become more difficult as a function of performance on a session-by-session basis. Each  
7  
8 training session lasts approximately 40-50 minutes, with one session to be completed per day 5  
9  
10 days each week for 5 weeks, for a total of 25 sessions. The program yields individual session-by-  
11  
12 session and task-by-task training results, including the children's responses, time spent on each  
13  
14 task, and evolution curves. Cogmed is not FDA-regulated. Based on our specific aims, Cogmed  
15  
16 is considered a Non-Significant Risk Device.  
17  
18  
19  
20  
21

22 Study tablets (i.e., iPads) are provided to families randomized to the Cogmed group in  
23  
24 order to standardize the method of delivery. Families receive a link for downloading a web-based  
25  
26 software program to the tablet. The program is installed on the tablet by a study coordinator who  
27  
28 explains how the training program works and how to log into the system and complete training.  
29  
30 The training session and installation of the program are completed after baseline assessment and  
31  
32 randomization. Parents and children will be actively involved, and during the installation session,  
33  
34 children will complete several practice trials under the supervision of the study coordinator. The  
35  
36 25 sessions will be completed by the child, supervised by a parent. For the first 5 sessions, the  
37  
38 child trains on the same set of games; on the 6<sup>th</sup> session and every 5<sup>th</sup> session thereafter, a new  
39  
40 task is introduced and replaces one of the initial tasks. At the end of each session, the child can  
41  
42 play an age-appropriate tablet game as a reward. After each session, a parent will upload the  
43  
44 results to a secure website. Families are contacted weekly to check program function and discuss  
45  
46 concerns. Compliance is automatically registered and is defined as completing at least 20  
47  
48 sessions, the criterion by which children are categorized as compliant or non-compliant to  
49  
50 treatment.<sup>41-42</sup>  
51  
52  
53  
54  
55  
56  
57  
58  
59  
60

## Running Head: Executive Function Intervention for Children with CHD

To implement this intervention, each investigator and study coordinator involved in coaching is certified as a “Cogmed Coach.” The Cogmed Coaches will monitor children’s performance every week during the intervention to permit continuous evaluation of treatment compliance and fidelity. A designated Cogmed Coach will be available during the trial to respond to any questions or help with any difficulties during the training. Parents will be asked to complete a training evaluation scale following completion of Cogmed; this scale is an integrated component of Cogmed that gathers information regarding the child’s motivation and attention during the training as well as parents’ feedback. As soon as a child finishes the intervention, a blinded post-treatment assessment will be scheduled to occur within the following weeks.

### **Control group: Standard of care**

Children randomly assigned to the control group will receive the standard of care recommended for patients with critical CHD. This includes cardiac surveillance and, if needed, neurodevelopmental counseling and screening at Boston Children’s Hospital Cardiac Neurodevelopmental Program. Once enrolled in the study, a child in the control group will not receive Cogmed intervention or any other cognitive intervention that targets executive functions or ADHD symptoms until after the 3-month follow-up assessment is completed, i.e., 5-6 months after initial enrollment. Like children assigned to the intervention group, children in the control group can continue treatments that are already in place for other neurodevelopmental disabilities (e.g., speech therapy, occupational services). For children in the control group, post-treatment and 3-month follow-up assessments will be performed 6 to 7 weeks and 4 to 5 months after baseline assessment, respectively. After the study is completed, children in the control group will be offered the possibility of completing the Cogmed intervention at no cost.

### **Primary outcome measure**

Running Head: Executive Function Intervention for Children with CHD

1  
2  
3 The NIH Toolbox<sup>55</sup> is a set of computerized assessments designed to measure outcomes  
4  
5 in longitudinal or intervention trials. This battery is particularly appropriate for our study because  
6  
7 it is presented in a computerized child-friendly version, paralleling that of the Cogmed  
8  
9 intervention. The *List Sorting Working Memory Test* from the NIH Toolbox is the primary  
10  
11 outcome of the trial. This standardized measure assesses the ability to process information across  
12  
13 a series of modalities (visual-spatial and verbal), to hold this information in a short-term buffer,  
14  
15 and to actively manipulate it mentally. It is considered an excellent composite indicator of  
16  
17 children's EF skills, as it requires the simultaneous implementation of control of attention and  
18  
19 working memory abilities on tasks of increasing complexity. Mean scores are automatically  
20  
21 computed and are compared to a standardization sample of US children of the same age. They  
22  
23 are normally distributed (mean=100, SD=15) in the standardization sample. The construct  
24  
25 validity of the NIH Toolbox working memory tasks is 0.58 for convergent validity and 0.30 for  
26  
27 divergent validity. This test has a test-retest reliability of 0.89 (95% confidence interval: 0.85 to  
28  
29 0.92).  
30  
31  
32  
33  
34  
35

### 36 **Secondary outcome measures**

37  
38 **NIH Toolbox Cognition Battery.**<sup>55</sup> We include tests that measure cognitive flexibility, attention  
39  
40 and inhibitory control, episodic memory, language, and processing speed. Mean scores on the  
41  
42 following tests will be our secondary outcomes: (1) *Flanker Inhibitory Control and Attention*  
43  
44 *Test*, which measures a child's ability to control automatic response tendencies that may interfere  
45  
46 with achieving a goal; (2) *Dimensional Change Card Sort Test*, which assesses a child's capacity  
47  
48 to switch among multiple aspects of a task; (3) *Picture Sequence Memory Test*, which measures a  
49  
50 child's ability to remember the sequence of pictures shown on the screen; (4) *Picture Vocabulary*  
51  
52 *Test* and *Oral Reading Recognition*, which assess receptive vocabulary and reading decoding  
53  
54  
55  
56  
57  
58  
59

Running Head: Executive Function Intervention for Children with CHD

1  
2  
3 skills; and (5) *Pattern Comparison Processing Speed Test*, which assesses the amount of time it  
4  
5 takes a child to process a set amount of information. All scores are standardized and normally  
6  
7 distributed (mean=100, SD=15) in the standardization sample. The test-retest reliability of these  
8  
9 tests varies between 0.82 and 0.96.  
10  
11

12  
13 **Behavior Rating Inventory of Executive Function, Second Edition.**<sup>56</sup> The BRIEF-2 is a  
14  
15 standardized questionnaire measuring children's every-day life executive functioning. It includes  
16  
17 nine scales: Inhibit, Self-Monitor, Shift, Emotional Control, Initiate, Working Memory,  
18  
19 Plan/Organize, Task-Monitor, and Organization of Materials. Parent and teacher versions of the  
20  
21 BRIEF-2 will be included. We will analyze the General Executive Composite T score (mean=50,  
22  
23 SD=10 for the standardization sample) for each version (Parent and Teacher), which incorporate  
24  
25 results from all clinical scales. The composite indices of the BRIEF-2 have high internal  
26  
27 consistency (0.94 to 0.98 in the normative sample) and high test-retest reliability (0.84 to 0.88  
28  
29 for parents over a 2-week interval; 0.90 to 0.92 for teachers over a 3.5-week interval).  
30  
31  
32

33  
34 **Conners, 3<sup>rd</sup> Edition.**<sup>57</sup> The Conners-3 is a questionnaire which assesses ADHD-related  
35  
36 behaviors in children 3 to 17 years old. We will analyze mean T scores (mean=50, SD=10 for the  
37  
38 standardization sample) for the ADHD Inattentive and ADHD Hyperactive-Impulsive DSM-5  
39  
40 Symptom Scales as well as the ADHD Index for each version (Parent and Teacher). For children  
41  
42 6-11 years old, the Cronbach's alpha coefficients for scores on the scales range from 0.87 to 0.95  
43  
44 for both parent and teacher ratings, indicating satisfactory internal consistency. Test-retest  
45  
46 reliability for the scales ranges from 0.67 to 0.72 for parents and 0.47 to 0.80 for teachers.  
47  
48  
49

50  
51 **Social Responsiveness Scale, Second Edition.**<sup>58</sup> The SRS-2 questionnaire evaluates autism  
52  
53 spectrum symptoms, including those relating to social awareness, social cognition,  
54  
55 communication, social motivation, and autistic traits, in individuals older than 2.5 years. We will  
56  
57  
58  
59

Running Head: Executive Function Intervention for Children with CHD

1  
2  
3 analyze T scores (mean=50, SD=10 for the standardization sample) from both versions (Parent  
4 and Teacher). Ratings show good internal consistency and interrater reliability.  
5  
6

7  
8 The schedule of neurodevelopmental assessment data collection is presented in Table 1.  
9  
10  
11  
12  
13  
14  
15  
16  
17  
18  
19  
20  
21  
22  
23  
24  
25  
26  
27  
28  
29  
30  
31  
32  
33  
34  
35  
36  
37  
38  
39  
40  
41  
42  
43  
44  
45  
46  
47  
48  
49  
50  
51  
52  
53  
54  
55  
56  
57  
58  
59  
60

For peer review only

**Table 1. Schedule of neurodevelopmental assessment data collection**

|                           | Assessment                                                      | Informant | Baseline | Post-treatment* | Follow-up** |
|---------------------------|-----------------------------------------------------------------|-----------|----------|-----------------|-------------|
| <b>Primary Outcome</b>    | NIH Toolbox List Sorting Working Memory Test                    | Child     | X        | X               | X           |
|                           | NIH Toolbox Cognition Battery                                   | Child     | X        | X               | X           |
| <b>Secondary Outcomes</b> | Behavior Rating Inventory of Executive Function, Second Edition | Parent    | X        | X               | X           |
|                           |                                                                 | Teacher   | X        | X               | X           |
|                           | Conners, Third Edition                                          | Parent    | X        | X               | X           |
|                           |                                                                 | Teacher   | X        | X               | X           |
|                           | Social Responsiveness Scale, Second Edition                     | Parent    | X        | X               | X           |
| Teacher                   |                                                                 | X         | X        | X               |             |

\*Post-treatment (one to two weeks after cessation of intervention and/or 6 to 7 weeks after baseline).

\*\*3-month follow-up (3 months after completion of the intervention and/or 4 to 5 months after baseline).

### Covariate measures

We will investigate cognitive, medical, and sociodemographic patient-specific factors as predictors of response to the intervention, at both post-treatment and 3-month follow-up assessments. The following variables will be investigated: baseline IQ scores on the Wechsler Intelligence Scale for Children, Fifth Edition<sup>59</sup>, and perinatal medical history such as birth weight, gestational age, type of CHD, history of neurological abnormalities, number of open-heart surgeries, intensive care unit length of stay, and total number of hospitalizations.

### Data Management and Safety Monitoring

Overall integration of the statistics, data management and administrative functions of this trial occur in the Department of Cardiology's Research Support and Statistics Core (RSSC) led by Drs. Jane Newburger and David Wypij. The RSSC will provide the infrastructure necessary to facilitate the conduct of this clinical trial including biostatistical analysis, computerized data

Running Head: Executive Function Intervention for Children with CHD

1  
2  
3 entry, data base programming and development, data management, quality control, assistance  
4  
5 with manuscript preparation and administrative functions. The RSSC will provide a centralized  
6  
7 resource for maintaining database. Study documents are being stored in individual subject  
8  
9 folders, each folder containing a tracking page. All study materials are stored in a locked file  
10  
11 cabinet accessible only to authorized study staff. All study data is recorded on Case Report  
12  
13 Forms and entered into a REDCap (Research Electronic Data Capture) database.  
14  
15

16  
17 A Data and Safety Monitoring Board (DSMB) is comprised of expert members in one of the  
18  
19 specific areas at issue in the study: Cardiology, Neuropsychology and Biostatistics. Members  
20  
21 will be independent of the study investigators and their Departments at Boston Children's  
22  
23 Hospital as well as from the sponsors of this study. The function of the DSMB will be to advise  
24  
25 the funding sources, Boston Children's Hospital and the study investigators on (1) final study  
26  
27 designs and protocols prior to the beginning of data collection, (2) problems with protocol imple-  
28  
29 mentation, (3) frequency of occurrence of adverse events and their relation to study protocols, (4)  
30  
31 withdrawals and losses to follow-up, (5) data interpretation and ethical issues, and (6)  
32  
33 recommendations arising from the study. The DSMB Chair will receive reports of all serious  
34  
35 events throughout the conduct of the study. This trial has been considered as a Non-Significant  
36  
37 Risk device study and reviewed accordingly by the Boston Children's Hospital Institutional  
38  
39 Review Board and the Human Research Protection Office (HRPO), US Department of Defense.  
40  
41  
42  
43  
44

45 A complete description of this trial's data management plan, Safety Monitoring Board and  
46  
47 Risk/Benefits Assessment is presented in Appendix 1.  
48  
49

### 50 **Sample size and power considerations**

51  
52  
53 Our specific aims are to determine whether there are significant differences between the  
54  
55 intervention and control groups in the changes in scores on the List Sorting Working Memory  
56  
57  
58



## Running Head: Executive Function Intervention for Children with CHD

1  
2  
3 Test between measurements at baseline and post-treatment (Specific Aim 1) and between  
4  
5 baseline and 3-month follow-up (Specific Aim 2). Although this test has a good test-retest  
6  
7 reliability of  $\rho=0.87$ , to be conservative, we will assume a value of  $\rho=0.70$  between  
8  
9 measurements at baseline and post-treatment and between baseline and 3-month follow-up on the  
10  
11 same subject. Given a sample size of 100 subjects,  $\rho=0.70$  for within-subject correlations, and a  
12  
13 two-sided Type I error rate of 5%, we have 81.4% power to detect a mean difference of 0.5 SD  
14  
15 between treatment groups, with a conservative 20% attrition rate (hence, analyzing a minimum  
16  
17 of 80 subjects) in our primary outcome measure. This corresponds to a mean difference of 7.5  
18  
19 units, given an expected SD of 15 for the List Sorting Working Memory Test of the NIH  
20  
21 Toolbox.  
22  
23  
24  
25

26  
27 Among children who receive the Cogmed intervention, we also seek to assess  
28  
29 associations of cognitive, sociodemographic, and medical factors with changes in the scores for  
30  
31 our primary outcome measure (Specific Aim 3). Given a sample size of 50 children randomized  
32  
33 to receive Cogmed intervention and a two-sided Type I error rate of 5%, we have 79.9% power  
34  
35 to detect a correlation of 0.43 (or  $R^2 = 0.43^2 = 0.185$  from a linear regression) between a patient-  
36  
37 specific factor and our primary outcome variable even with a conservative 20% attrition rate  
38  
39 (analyzing a minimum of 40 subjects).  
40  
41  
42

### **Data analysis plan**

43  
44  
45  
46 For Specific Aims 1 and 2, the efficacy of the intervention will be evaluated by  
47  
48 comparing within-subject differences (baseline to post-treatment, baseline to 3-month follow-up,  
49  
50 and, in secondary analyses, post-treatment to 3-month follow-up) across treatment groups using  
51  
52 an intention-to-treat analysis.  
53  
54  
55  
56  
57  
58  
59

## Running Head: Executive Function Intervention for Children with CHD

1  
2  
3 Descriptive statistics will be calculated, including means, standard deviations, medians,  
4 and interquartile ranges for continuous variables and frequency counts and percentages for  
5 categorical variables. The primary outcome measure, the List Sorting Working Memory Test of  
6 the NIH Toolbox, and most other study outcomes are continuous variables. T tests and linear  
7 regression will be used to assess differences between the intervention and control groups for  
8 continuous outcomes (i.e., differences in means, 95% CI). Proportions and logistic regression  
9 will be used to examine group differences in binary outcomes (i.e., chi square tests, odds ratios,  
10 95% CI). We expect that randomization will produce balance between treatment groups in terms  
11 of demographic and baseline factors, but we will use regression methods to adjust for any factors  
12 that may be unbalanced. All analyses will be accompanied by graphical exploration of the data  
13 and screening for outlying and influential observations. Data transformations and nonparametric  
14 methods (e.g., Wilcoxon rank sum tests) will be used as appropriate when parametric  
15 assumptions are violated. Primary analyses of treatment group differences will focus on  
16 complete cases. In secondary analyses, we will assume no change over time for subjects who do  
17 not return for their post-treatment assessment (i.e., last value carried forward approach), but we  
18 will also carry out other sensitivity analyses to assess the strength of our findings based on other  
19 missing data assumptions.  
20  
21  
22  
23  
24  
25  
26  
27  
28  
29  
30  
31  
32  
33  
34  
35  
36  
37  
38  
39  
40

41  
42 For Specific Aim 3, we will explore the associations between patient factors and within-  
43 subject differences (baseline to post-treatment, baseline to 3-month follow-up) using correlation  
44 and linear regression methods, including consideration of possible confounding or effect  
45 modification. Specific attention will be given to certain patient-specific risk factors including  
46 timing of first heart surgery (neonatal *versus* non-neonatal), number of surgeries and  
47 neurological complications. Because we will be conducting multiple analyses with several  
48  
49  
50  
51  
52  
53  
54  
55  
56  
57  
58  
59  
60

Running Head: Executive Function Intervention for Children with CHD

1  
2  
3 predictors and primary and secondary outcomes in an exploratory fashion, we will interpret  
4  
5 results cautiously, based not only on significance levels ( $p < 0.05$ , two-tailed) but also on the  
6  
7 magnitude of differences, correlations, or regression effects. As appropriate, we will also  
8  
9 consider the use of other statistical methods, such as generalized additive models, partial and  
10  
11 sparse partial least squares, and family-wise error rates, in our approach. Analyses will be  
12  
13 conducted primarily using SAS, Stata, SPSS, and R.  
14  
15

## 16 17 **ETHICS AND DISSEMINATION**

18  
19  
20 This study has received full Institutional Review Board (IRB) approval from Boston's  
21  
22 Children's Hospital IRB (P00022440) and has also been reviewed and approved by the Human  
23  
24 Protection Agency from the United States Department of Defense. Protocol modifications and  
25  
26 amendments will be submitted to the ethical committees for approval. Amendments to the study  
27  
28 protocol will be added to publications reporting the study outcomes. This trial has been  
29  
30 registered with the American Clinical Trials Registry (NCT03023644). Prior to entering into the  
31  
32 trial, all parents or legal guardians and children will give written informed consent or assent to  
33  
34 participate. Appendix 2 presents the study consent form. All information will follow IRB and  
35  
36 Human Protection guidelines for confidentiality and data protection. The study results will be  
37  
38 disseminated through publications in scientific journals, presentations at scientific conferences,  
39  
40 and directly to the families who participated in the study. All co-investigators will be co-authors  
41  
42 of the study outcomes publications without the use of professional writers. Data will be granted  
43  
44 upon request.  
45  
46  
47  
48

## 49 50 **Trial Progress**

51  
52 The trial is currently in the active recruitment phase (first baseline assessment March, 2017).  
53  
54 This is Protocol V.4, 10 July 2018. Substantial protocol amendments will be communicated to  
55  
56  
57  
58  
59

Running Head: Executive Function Intervention for Children with CHD

investigators via email and to other parties as required. All changes are submitted to Boston Children's Hospital's IRB, to the Sponsor of this trial (US Department of Defense) and updated in [clinicaltrials.gov](http://clinicaltrials.gov).

## Discussion

This article has presented the background and design for a RCT investigating the efficacy of a 5-week working memory intervention for children with CHD who underwent open-heart surgery in infancy. This is the first study to investigate the effects of a neurocognitive intervention targeting EF in school-aged children with CHD. We will evaluate children's cognitive and social outcomes including autism spectrum and ADHD symptoms. Furthermore, the results from this trial will provide information on potential patient-specific factors associated with response to the intervention.

Executive dysfunction may have cascading adverse effects on a myriad of domains ranging from specific neurocognitive abilities to school achievement, social adaptation, and, ultimately, quality of life. Timely prevention and treatment of these issues is a priority in the care of patients with CHD. If proven effective, this type of neurocognitive intervention could be implemented in a clinical outpatient practice for patients at increased neurodevelopmental risk.

## Running Head: Executive Function Intervention for Children with CHD

**References**

1. Fyler DC. Report of the New England Regional Infant Cardiac Program. *Pediatrics*. 1980;65:S375-S461.
2. Loffredo C. Epidemiology of cardiovascular malformations: prevalence and risk factors. *Am J Med Genet*. 2000;97:319-25.
3. Ferry PC. Neurologic sequelae of cardiac surgery in children. *Am J Dis Child*. 1987;141:309-12.
4. Marino BS, Lipkin PH, Newburger JW, Peacock G, Gerdes M, Gaynor JW, Mussatto KA, Uzark K, Goldberg CS, Johnson WH, Jr., Li J, Smith SE, Bellinger DC, Mahle WT, American Heart Association Congenital Heart Defects Committee, Council on Cardiovascular Disease in the Young, Council on Cardiovascular Nursing, and Stroke Council. Neurodevelopmental outcomes in children with congenital heart disease: evaluation and management: a scientific statement from the American Heart Association. *Circulation*. 2012;126(9):1143-72.
5. Mahle WT, Tavani F, Zimmerman RA, Nicolson SC, Galli KK, Gaynor JW, Clancy RR, Montenegro LM, Spray TL, Chiavacci RM, Wernovsky G, Kurth CD. An MRI study of neurological injury before and after congenital heart surgery. *Circulation*. 2002;106(Suppl 1):109-14.
6. Miller SP, McQuillen PS, Hamrick S, Xu D, Glidden DV, Charlton N, Karl T, Azakie A, Ferriero DM, Barkovich AJ, Vigneron DB. Abnormal brain development in newborns with congenital heart disease. *N Engl J Med*. 2007;357(19):1928-38.
7. Owen M, Shevell M, Majnemer A, Limperopoulos C. Abnormal brain structure and function in newborns with complex congenital heart defects before open heart surgery: a review of the evidence. *J Child Neurol*. 2011;26(6):743-55.
8. Diamond A. Executive functions. *Annu Rev Psychol*. 2012;64:135.
9. Blair C, Razza RP. Relating effortful control, executive function, and false belief understanding to emerging math and literacy ability in kindergarten. *Child Dev*. 2007;78(2):647-63.
10. Diamond A, Barnett WS, Thomas J, Munro S. Preschool program improves cognitive control. *Science*. 2007;318(5855):1387-8.
11. Bull R, Scerif G. Executive functioning as a predictor of children's mathematics ability: inhibition, switching, and working memory. *Dev Neuropsychol*. 2001;19(3):273-93.
12. Biederman J, Monuteaux MC, Doyle AE, Seidman LJ, Wilens TE, Ferrero F, Morgan CL, Faraone SV. Impact of executive function deficits and attention-deficit/hyperactivity disorder (ADHD) on academic outcomes in children. *J Consult Clin Psychol*. 2004;72(5):757-66.
13. Espy KA, McDiarmid MM, Cwik MF, Stalets MM, Hamby A, Senn TE. The contribution of executive functions to emergent mathematic skills in preschool children. *Dev Neuropsychol*. 2004;26(1):465-86.
14. Diamond A. Normal development of prefrontal cortex from birth to young adulthood: cognitive functions, anatomy, and biochemistry. In: Stuss D, Knight, RT, editor. *Principles of Frontal Lobe Function*. New York, NY: Oxford University Press; 2002. p. 466-503.

## Running Head: Executive Function Intervention for Children with CHD

15. Barkley RA. Distinguishing sluggish cognitive tempo from ADHD in children and adolescents: executive functioning, impairment, and comorbidity. *J Clin Child Adolesc Psychol.* 2013;42(2):161-73.
16. Lai MC, Lombardo MV, Baron-Cohen S. Autism. *Lancet.* 2014;383(9920):896-910.
17. Pellicano E. Individual differences in executive function and central coherence predict developmental changes in theory of mind in autism. *Dev Psychol.* 2010;46(2):530-44.
18. Baler RD, Volkow ND. Drug addiction: the neurobiology of disrupted self-control. *Trends Mol Med.* 2006;12(12):559-66.
19. Miller AL, Lee HJ, Lumeng JC. Obesity-associated biomarkers and executive function in children. *Pediatr Res.* 2015;77(1-2):143-7.
20. Levy S, Katusic SK, Colligan RC, Weaver AL, Killian JM, Voigt RG, Barbaresi WJ. Childhood ADHD and risk for substance dependence in adulthood: a longitudinal, population-based study. *PLoS One.* 2014;9(8):e105640.
21. Calderon J, Jambaque I, Bonnet D, Angeard N. Executive functions development in 5- to 7-year-old children with transposition of the great arteries: a longitudinal study. *Dev Neuropsychol.* 2014;39(5):365-84.
22. Bellinger DC, Wypij D, Rivkin MJ, DeMaso DR, Robertson RL, Jr., Dunbar-Masterson C, Rappaport LA, Wernovsky G, Jonas RA, Newburger JW. Adolescents with d-transposition of the great arteries corrected with the arterial switch procedure: neuropsychological assessment and structural brain imaging. *Circulation.* 2011;124(12):1361-9.
23. Calderon J, Bonnet D, Courtin C, Concordet S, Plumet MH, Angeard N. Executive function and theory of mind in school-aged children after neonatal corrective cardiac surgery for transposition of the great arteries. *Dev Med Child Neurol.* 2010;52(12):1139-44.
24. Calderon J, Angeard N, Moutier S, Plumet MH, Jambaque I, Bonnet D. Impact of prenatal diagnosis on neurocognitive outcomes in children with transposition of the great arteries. *J Pediatr.* 2012;161(1):94-8 e1.
25. Bellinger DC, Wypij D, duDuplessis AJ, Rappaport LA, Jonas RA, Wernovsky G, Newburger JW. Neurodevelopmental status at eight years in children with dextro-transposition of the great arteries: the Boston Circulatory Arrest Trial. *J Thorac Cardiovasc Surg.* 2003;126(5):1385-96.
26. Bellinger DC, Rivkin MJ, Demaso D, Robertson RL, Stopp C, Dunbar-Masterson C, Wypij D, Newburger JW. Adolescents with tetralogy of Fallot: neuropsychological assessment and structural brain imaging. *Cardiol Young.* 2015;25:338-47.
27. Miatton M, De Wolf D, Francois K, Thiery E, Vingerhoets G. Neuropsychological performance in school-aged children with surgically corrected congenital heart disease. *J Pediatr.* 2007;151(1):73-78.
28. Hovels-Gurich HH, Konrad K, Skorzenski D, Herpertz-Dahlmann B, Messmer BJ, Seghaye MC. Attentional dysfunction in children after corrective cardiac surgery in infancy. *Ann Thorac Surg.* 2007;83(4):1425-30.
29. Gaynor JW, Gerdes M, Nord AS, Bernbaum J, Zackai E, Wernovsky G, Clancy RR, Heagerty PJ, Solot CB, McDonald-McGinn D, Jarvik GP. Is cardiac diagnosis a predictor of neurodevelopmental outcome after cardiac surgery in infancy? *J Thorac Cardiovasc Surg.* 2010;140(6):1230-7.



## Running Head: Executive Function Intervention for Children with CHD

30. Cassidy AR, White MT, DeMaso DR, Newburger JW, Bellinger DC. Executive function in children and adolescents with critical cyanotic congenital heart disease. *J Int Neuropsychol Soc.* 2015;21(1):34-49
31. Neal AE, Stopp C, Wypij D, Bellinger DC, Dunbar-Masterson C, DeMaso DR, Newburger JW. Predictors of health-related quality of life in adolescents with tetralogy of Fallot. *J Pediatr.* 2015;166(1):132-8.
32. Calderon J, Bellinger DC. Executive function deficits in congenital heart disease: why is intervention important? *Cardiol Young.* 2015;25(7):1238-46.
33. Shillingford AJ, Glanzman MM, Ittenbach RF, Clancy RR, Gaynor JW, Wernovsky G. Inattention, hyperactivity, and school performance in a population of school-age children with complex congenital heart disease. *Pediatrics.* 2008;121(4):e759-e67.
34. Hansen E, Poole TA, Nguyen V, Lerner M, Wigal T, Shannon K, Wigal SB, Batra AS. Prevalence of ADHD symptoms in patients with congenital heart disease. *Pediatr Int.* 2012;54(6):838-43.
35. DeMaso DR, Labella M, Taylor GA, Forbes PW, Stopp C, Bellinger DC, Rivkin MJ, Wypij D, Newburger JW. Psychiatric disorders and function in adolescents with d-transposition of the great arteries. *J Pediatr.* 2014;165:760-6.
36. Newburger JW, Sleeper LA, Bellinger DC, Goldberg CS, Tabbutt S, Lu M, Mussatto KA, Williams IA, Gustafson KE, Mital S, Pike N, Sood E, Mahle WT, Cooper DS, Dunbar-Masterson C, Krawczeski CD, Lewis A, Menon SC, Pemberton VL, Ravishankar C, Atz TW, Ohye RG, Gaynor JW. Early developmental outcome in children with hypoplastic left heart syndrome and related anomalies: the single ventricle reconstruction trial. *Circulation.* 2012;125(17):2081-91.
37. Yamada DC, Porter AA, Conway JL, LeBlanc JC, Shea SE, Hancock-Friesen CL, Warren AE. Early repair of congenital heart disease associated with increased rate of attention deficit hyperactivity disorder symptoms. *Can J Cardiol.* 2013;29(12):1623-8.
38. Sistino JJ, Atz AM, Simpson KN, Ellis C, Ikonomidis JS, Bradley SM. The prevalence of attention deficit/hyperactivity disorder following neonatal aortic arch repair. *Cardiol Young.* 2015;25(4):663-9.
39. von Rhein M, Buchmann A, Hagmann C, Huber R, Klaver P, Knirsch W, Latal B. Brain volumes predict neurodevelopment in adolescents after surgery for congenital heart disease. *Brain.* 2014;137(Pt 1):268-76.
40. Schaefer C, von Rhein M, Knirsch W, Huber R, Natalucci G, Caflisch J, Landolt MA, Latal B. Neurodevelopmental outcome, psychological adjustment, and quality of life in adolescents with congenital heart disease. *Dev Med Child Neurol.* 2013;55(12):1143-9.
41. Klingberg T, Fernell E, Olesen PJ, Johnson M, Gustafsson P, Dahlstrom K, Gillberg CG, Forssberg H, Westerberg H. Computerized training of working memory in children with ADHD--a randomized, controlled trial. *J Am Acad Child Adolesc Psychiatry.* 2005;44(2):177-86.
42. Klingberg T, Forssberg H, Westerberg H. Training of working memory in children with ADHD. *J Clin Exp Neuropsychol.* 2002;24(6):781-91.
43. Holmes J, Gathercole SE, Dunning DL. Adaptive training leads to sustained enhancement of poor working memory in children. *Dev Sci.* 2009;12(4):F9-15.
44. Holmes JG, S.E. Taking working memory training from the laboratory into schools. *Educational Psychology: An International Journal of Experimental Educational Psychology.* 2014;34(4):440.

## Running Head: Executive Function Intervention for Children with CHD

- 1
  - 2
  - 3
  - 4
  - 5
  - 6
  - 7
  - 8
  - 9
  - 10
  - 11
  - 12
  - 13
  - 14
  - 15
  - 16
  - 17
  - 18
  - 19
  - 20
  - 21
  - 22
  - 23
  - 24
  - 25
  - 26
  - 27
  - 28
  - 29
  - 30
  - 31
  - 32
  - 33
  - 34
  - 35
  - 36
  - 37
  - 38
  - 39
  - 40
  - 41
  - 42
  - 43
  - 44
  - 45
  - 46
  - 47
  - 48
  - 49
  - 50
  - 51
  - 52
  - 53
  - 54
  - 55
  - 56
  - 57
  - 58
  - 59
  - 60
45. Westerberg H, Klingberg T. Changes in cortical activity after training of working memory--a single-subject analysis. *Physiol Behav.* 2007;92(1-2):186-92.
46. Brehmer Y, Westerberg H, Backman L. Working-memory training in younger and older adults: training gains, transfer, and maintenance. *Front Hum Neurosci.* 2012;6:63.
47. Beck SJ, Hanson CA, Puffenberger SS, Benninger KL, Benninger WB. A controlled trial of working memory training for children and adolescents with ADHD. *J Clin Child Adolesc Psychol.* 2010;39(6):825-36.
48. Gropper RJ, Gotlieb H, Kronitz R, Tannock R. Working memory training in college students with ADHD or LD. *J Atten Disord.* 2014;18(4):331-45.
49. Johansson B, Tornmalm M. Working memory training for patients with acquired brain injury: effects in daily life. *Scand J Occup Ther.* 2012;19(2):176-83.
50. Lundqvist A, Grundstrom K, Samuelsson K, Ronnberg J. Computerized training of working memory in a group of patients suffering from acquired brain injury. *Brain Inj.* 2010;24(10):1173-83.
51. Bergman Nutley S, Soderqvist S, Bryde S, Thorell LB, Humphreys K, Klingberg T. Gains in fluid intelligence after training non-verbal reasoning in 4-year-old children: a controlled, randomized study. *Dev Sci.* 2011;14(3):591-601.
52. Thorell LB, Lindqvist S, Bergman Nutley S, Bohlin G, Klingberg T. Training and transfer effects of executive functions in preschool children. *Dev Sci.* 2009;12(1):106-13.
53. Grunewaldt KH, Lohaugen GC, Austeng D, Brubakk AM, Skranes J. Working memory training improves cognitive function in VLBW preschoolers. *Pediatrics.* 2013;131(3):e747-54.
54. Lohaugen GC, Antonsen I, Haberg A, Gramstad A, Vik T, Brubakk AM, Skranes J. Computerized working memory training improves function in adolescents born at extremely low birth weight. *J Pediatr.* 2011;158(4):555-61 e4
55. Zelazo PD, Anderson JE, Richler J, Wallner-Allen K, Beaumont JL, Weintraub S. II. NIH Toolbox Cognition Battery (CB): measuring executive function and attention. *Monogr Soc Res Child Dev.* 2013;78(4):16-33.
56. Gioia GA, Isquith PK, Guy SC, Kenworthy L. Behavior rating inventory of executive function. *Child Neuropsychol.* 2000;6(3):235-8.
57. Conners CK. *Manual for the Conners Rating Scales - Revised.* North Tonawanda, NY; MHS Assessments; 1997.
58. Constantino JN, Davis SA, Todd RD, Schindler MK, Gross MM, Brophy SL, Metzger LM, Shoushtari CS, Splinter R, Reich W. Validation of a brief quantitative measure of autistic traits: comparison of the social responsiveness scale with the autism diagnostic interview-revised. *J Autism Dev Disord.* 2003;33(4):427-33.
59. Wechsler D. *Wechsler Intelligence Scale for Children - Fifth Edition.* 5th ed: Psychological Corporation, Inc.; 2014.



Running Head: Executive Function Intervention for Children with CHD

1  
2  
3 **Contributors** JC, DCB, and JWN are the primary investigators and together with DW designed  
4 and established this research study. JC and JWN were responsible for ethics applications and  
5  
6 and established this research study. JC and JWN were responsible for ethics applications and  
7  
8 reporting. JC, DCB, CH, and AL are responsible for data collection and implementation of the  
9  
10 intervention. JC will take lead roles on preparation for publication of the clinical outcomes of the  
11  
12 study. JWN, DCB, DW, CS, CH, and AL will contribute to the preparation of publications  
13  
14 within their respective fields of expertise. DW and CS will take on a lead role of the statistical  
15  
16 analysis for the study. JC drafted the final version of this manuscript. All authors critically  
17  
18 reviewed and approved the final version. All data from this study will be submitted to peer-  
19  
20 review journals and for presentation at national and international scientific conferences.  
21  
22

23  
24 **Funding** This research was funded by the United States Department of Defense, Clinical Trials  
25  
26 awards (grant number W81XWH-16-1-0741).  
27

28 **Competing interests** No competing interests are reported. Authors do not have any commercial  
29  
30 or scientific affiliation with Pearson, Inc., distributor of Cogmed Working Memory Training.  
31  
32

33 **Ethics approval** Full ethical approval for this study has been obtained by the Boston Children's  
34  
35 Hospital's Institutional Review Board (IRB) (IRB number P00022440) and has also been  
36  
37 reviewed and approved by the Human Protection Agency from the United States Department of  
38  
39 Defense. All parent/guardians and children will give written informed consent or assent to  
40  
41 participate prior to entering into the trial.  
42  
43  
44  
45  
46  
47  
48  
49  
50  
51  
52  
53  
54  
55  
56  
57  
58  
59  
60

## Running Head: Executive Function Intervention for Children with CHD

1  
2  
3  
4  
5  
6 Figure 1. Flowchart of trial design (ND=neurodevelopmental)  
7  
8  
9  
10  
11  
12  
13  
14  
15  
16  
17  
18  
19  
20  
21  
22  
23  
24  
25  
26  
27  
28  
29  
30  
31  
32  
33  
34  
35  
36  
37  
38  
39  
40  
41  
42  
43  
44  
45  
46  
47  
48  
49  
50  
51  
52  
53  
54  
55  
56  
57  
58  
59  
60

For peer review only

1  
2  
3  
4  
5  
6  
7  
8  
9  
10  
11  
12  
13  
14  
15  
16  
17  
18  
19  
20  
21  
22  
23  
24  
25  
26  
27  
28  
29  
30  
31  
32  
33  
34  
35  
36  
37  
38  
39  
40  
41  
42  
43  
44  
45  
46  
47  
48  
49  
50  
51  
52  
53  
54  
55  
56  
57  
58  
59  
60

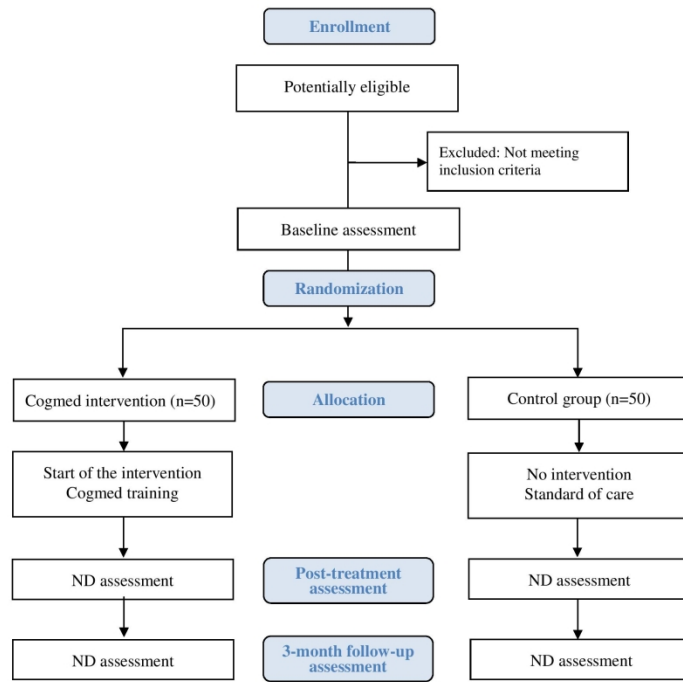

Figure 1. Study flow-chart  
215x279mm (300 x 300 DPI)

## Appendix 1

Calderon J, Bellinger DC, Hartigan C, Lord A, Stopp C, Wypij D, Newburger JW.  
Improving Neurodevelopmental Outcomes in Children with Congenital Heart  
Disease: Protocol for a Randomized Controlled Trial of Working Memory Training.

- 1) Data Management and Quality Control
- 2) Data and Safety Monitoring Board
- 3) Risk/Benefits Assessment and Risk Management

## 1) Data management and quality control

Overall integration of the statistics, data management, and administrative functions of this trial will occur in the Department of Cardiology's Research Support and Statistics Core (RSSC). The RSSC will be led by Drs. Jane Newburger and David Wypij. Key support personnel in the RSSC will be a Master's level statistician/statistical programmer (Christian Stopp) and Study Coordinator (Carolyn Dunbar-Masterson).

The purposes of the Research Support and Statistics Core are as follows:

1. To support final protocol development during the Planning Phases of the clinical trial, including refinement of study design, eligibility criteria, baseline and outcome measures, power and sample size calculations, randomization methods, statistical analysis plans (including early stopping rules), and ethical considerations.
2. To assist in overall study coordination of patient follow-up, training of study personnel, quality control and quality assurance, development of Case Report Forms and Manuals of Operations, database development, data entry, database checks and updates, and maintenance of blinding and firewalls.
3. To perform statistical analyses and study monitoring (including adverse event monitoring and Data and Safety Monitoring Board reports).
4. To plan and perform final data analyses, support publication and abstract preparation, and create final data sets for archival purposes.
5. To plan and analyze ancillary studies, such as mechanistic studies or analyses of the association of clinical variables with the outcomes of the intervention.
6. To provide administrative support as needed for research excellence in the trial.

1  
2  
3 The Research Support and Statistics Core will provide the infrastructure necessary to facilitate  
4 the conduct of the proposed clinical trial. Its functions include biostatistical analysis, forms  
5 design, data base programming and development, clinical data management, quality control,  
6 clinical research study coordination, assistance with manuscript preparation, and  
7 administrative functions. It provides a centralized core of key program project staff. In addition  
8 to including facilities needed to conduct clinical research studies at Boston Children's Hospital,  
9 it provides a centralized resource for maintaining databases and facilitating quality-control  
10 procedures for all patient-related data. Individuals in the RSSC will provide computerized data  
11 entry and quality control of data. The policies, procedures, and resources already in existence  
12 in the Statistical and Data Coordinating Center of the Department of Cardiology at Boston  
13 Children's Hospital provide the infrastructure to facilitate these efforts. Computing resources  
14 and biostatistical collaboration will be provided for the design, conduct, analysis, and reporting  
15 of the trial. Computing resources will also be supported by the RSSC.  
16  
17  
18  
19  
20  
21  
22  
23  
24  
25  
26  
27  
28  
29  
30  
31  
32

33 Study documents will be stored in individual subject folders; each folder will contain a  
34 tracking page that enables study staff and investigators to record annotations and comments  
35 regarding the clinical data. All study materials will be stored in a locked file cabinet that is  
36 accessible only to authorized study staff. For data analyses, all de-identified Cogmed records will  
37 be downloaded and stored with the corresponding subject identification number for each subject.  
38 The majority of neurodevelopmental tests have a computerized format that automatically  
39 calculates children's score as a function of their performance. Subject confidentiality will be  
40 maintained by recording subject data with use of a unique subject identifier. Identifiable data, such  
41  
42  
43  
44  
45  
46  
47  
48  
49  
50  
51  
52  
53  
54  
55  
56  
57  
58  
59  
60

1  
2  
3 as contact information and medical record numbers, will be recorded and stored separately from  
4  
5 the clinical study data.  
6  
7

8 *Case Report Forms* will be developed jointly by the clinical, biostatistical, and data  
9  
10 coordination team members working on this clinical trial. Forms design features include the  
11  
12 selection of valid, reliable measurements that are less burdensome, development and testing of  
13  
14 reliability measures, pre-testing of forms, formatting of forms to ensure clarity (standard  
15  
16 conventions for coding close-ended questions, minimal use of open-ended questions), and smooth  
17  
18 flow in question patterns to reduce missing data. A detailed Manual of Operations will be  
19  
20 developed to ensure efficient, consistent, and accurate data collection and ease of communication.  
21  
22 The Manual of Operations will allow updating, as needed, using dated footers. The Case Report  
23  
24 Forms and Manual of Operations for this trial will be based on those successfully used in previous  
25  
26 studies by the investigative team.  
27  
28  
29  
30

31 All study data will be recorded and maintained on Case Report Forms and entered into a  
32  
33 REDCap (Research Electronic Data Capture) database. REDCap is a secure, fully customizable,  
34  
35 web-based application designed to support data capture for clinical research studies. REDCap  
36  
37 provides user-friendly Case Report Forms, audit trails, calculated fields, queries, and the ability to  
38  
39 set up a calendar to schedule and track critical study events, such as participant visits. Auto-  
40  
41 validation, branching/skip logic, and other features provide real-time data entry validation to  
42  
43 prevent logic errors, range checks to reduce out-of-range values, context-specific help actions, and  
44  
45 conditional logic to ensure accurate data collection. Designated users from the research study team  
46  
47 can be assigned different levels of access. REDCap is designed to comply with HIPAA regulations,  
48  
49  
50  
51  
52  
53  
54  
55  
56  
57  
58  
59  
60

1  
2  
3 and allows data export to common analysis packages such as SAS, Stata, R, or Excel. Daily  
4  
5 database backup routines are executed to ensure data safety, security, and reliability.  
6  
7

## 8 9 **2) Data and Safety Monitoring Board**

10  
11  
12 A Data and Safety Monitoring Board will be comprised of five members, each of whom is  
13 eminent in one of the specific areas at issue in the study: Pediatric Cardiology, Psychiatry and  
14 Neurodevelopment, and Biostatistics. Members of the DSMB must be independent of the study  
15 investigators and their departments at Boston Children's Hospital. The function of the DSMB will  
16 be to advise the funding sources, Boston Children's Hospital, and study investigators on: (1) final  
17 study designs and protocols prior to the beginning of data collection, (2) problems with protocol  
18 implementation, (3) frequency of occurrence of adverse events and their relation to study  
19 protocols, (4) withdrawals and losses to follow-up, (5) data interpretation and ethical issues, and  
20 (6) recommendations arising from the study. The DSMB Chair will receive reports of all serious  
21 events throughout the conduct of the study. The exact schedule and procedures for monitoring or  
22 stopping a study will be established by the DSMB during the first year of the study.  
23  
24  
25  
26  
27  
28  
29  
30  
31  
32  
33  
34  
35  
36  
37

38 Research Support and Statistics Core staff will assemble and maintain the required data on  
39 enrollment, adverse events and data quality for regular reporting to the DSMB, on a schedule to  
40 be dictated by the DSMB, and to prepare and present such reports. The methods of analysis for the  
41 clinical project and the criteria for early stopping will be developed by Dr. Wypij, with input and  
42 approval from the DSMB in general and the DSMB statistician in particular. Statistical analyses  
43  
44  
45  
46  
47  
48  
49  
50  
51  
52  
53  
54  
55  
56  
57  
58  
59  
60



1  
2  
3 pertinent to early-stopping decisions will be conducted by Dr. Wypij and presented for evaluation  
4  
5 to the DSMB on the agreed-upon schedule.  
6  
7

### 8 9 **3) Risks/Benefits Assessment**

10 This trial has been considered as a Non-Significant Risk device study and reviewed accordingly  
11  
12 by the Boston Children's Hospital Institutional Review Board and the Human Research Protection  
13  
14 Office (HRPO), US Department of Defense.  
15  
16

#### 17 18 **Foreseeable risks:**

19  
20  
21 This RCT does not involve any drugs or invasive procedures, and the injury associated with  
22  
23 participation is highly unlikely. Therefore, the trial is likely to entail minimal risk to participants.  
24  
25 The NSR determination for this study will not impact the risk/benefit ratio. Participating will  
26  
27 require considerable time, particularly in the group that receives the Cogmed Working Memory  
28  
29 Training. Children in this intervention group will complete 5 35-40 minute sessions per week for  
30  
31 5 weeks. We will be asking parents to supervise the child's completion of these sessions. The  
32  
33 children might find some of the Cogmed Program activities to be frustrating. However, the system  
34  
35 is "adaptive," in that the difficulty level of the tasks is titrated to match a child's abilities, thereby  
36  
37 insuring some success and lowering stress. The families might be inconvenienced by having to  
38  
39 make three visits to Boston Children's Hospital within a 5 month period.  
40  
41  
42  
43  
44  
45

46 There is some inconvenience and burden of completing questionnaires and some families may feel  
47  
48 uncomfortable answering questions. The parent-completed questionnaires will require  
49  
50 approximately 60 minutes to complete. We will aim for questionnaires to be completed prior to  
51  
52 the in-person assessment, however there will be little time pressure required for the completion of  
53  
54  
55  
56  
57  
58  
59  
60

1  
2  
3 the instruments by the parents and teachers as they will be mailed out to parents approximately 3  
4  
5 months prior to the appointment for the in-person evaluation.  
6  
7

### 8 **Risk Management Response:**

- 10  
11
- 12 ○ **Neurodevelopmental Testing and CogMed Intervention:** Prior to beginning the  
13  
14 evaluation, subjects and families will be told that the information they provide will be held  
15  
16 in confidence and not revealed to school officials or other authorities without their  
17  
18 permission, and that names will not be associated with answers in our database. Possible  
19  
20 referrals will be discussed with the family. Similarly, parents will be told that we are  
21  
22 required by law to report any evidence that suggests child abuse. As part of the debriefing,  
23  
24 both the child and parent will be asked if they would like additional care or services. If so,  
25  
26 we will provide referrals. If a patient's responses suggest engagement in risk-taking  
27  
28 behaviors, appropriate resources will be discussed and information provided. An  
29  
30 experienced psychiatric clinician will always be available to address with the children or  
31  
32 parents who experience any distress that the testing or questionnaires might stimulate.  
33  
34
  - 35 e) If children and/or parents exhibit any indication of suicidal thoughts or intentions, this will  
36  
37 be carefully discussed both with the parent(s) and subject. Suicidal intent, plans, and  
38  
39 means will be evaluated by a licensed clinician. Subjects judged to be at risk will be  
40  
41 referred for further evaluation and intervention. Referrals for emergency evaluation would  
42  
43 be made to our institution's Psychiatric Emergency Service or to hospitals closer to their  
44  
45 homes, if appropriate. The on-call and emergency service mental health providers will be  
46  
47 notified of the study's existence.  
48  
49
  - 50 f) If a subject exhibits a significant depression or appears to require psychiatric  
51  
52 hospitalization, s/he will have access to referral for treatment. If during the assessment,  
53  
54  
55  
56  
57  
58  
59  
60

1  
2  
3 the subject has a suicide plan or attempt or the severity of the adolescent's depression  
4 requires hospitalization, the psychiatric clinician at the participating center will facilitate  
5 hospitalization. If the subject requires additional care but does not require hospitalization,  
6 the research team will facilitate the subject's obtaining this care using his or her own health  
7 insurance.

- 8  
9  
10  
11  
12  
13  
14  
15 ○ **Ascertaining Vital Status of Subjects:** We will contact the subject's cardiologist before  
16 initiating contact with subjects and their families to be sure that the subject is alive. There  
17 is a tiny chance that the cardiologist might not have been informed about a subject's death  
18 and that we will cause distress by contacting parents of an expired subject not known to  
19 have died.  
20  
21  
22 ○ **Costs:** Tests required by the study will be provided free of charge. The study will also pay  
23 for parking for families.  
24  
25  
26 ○ **Alternatives:** Parents and children will be told that if they decline to participate, the future  
27 medical care that the child might receive at Children's Hospital in Boston will not be  
28 affected and that if they agree to participate, they are free to withdraw from the study at  
29 any time or to decline to participate in specific aspects of the study protocol.  
30  
31  
32 ○ **Confidentiality:** Investigators will take all reasonable measures to protect the  
33 confidentiality of subjects and their families, including the following:  
34  
35  
36  
37  
38  
39  
40  
41  
42  
43  
44  
45 a) Investigators will arrange for counseling if anxious feelings arise in the family at  
46 any time during the study.  
47  
48  
49  
50 b) Each child and parent is assigned a subject identification number (SID). All  
51 interview and clinical research data are stripped of identifiers and labeled with the  
52  
53  
54  
55  
56  
57  
58  
59  
60

1  
2  
3 study number. The enrollment log with participant identifiers will be maintained at  
4  
5 each site in a secured, locked location available only to the study staff.  
6  
7

- 8 c) The study will follow good clinical practices at all times. Databases will be secured  
9  
10 as previously discussed.  
11  
12  
13 d) The risk of breach of subject confidentiality will be minimized by storage of all  
14  
15 study materials in a locked file cabinet in a location separate from the laboratory  
16  
17 data.  
18  
19  
20 e) The subject's name and any other identifying information will not appear in any  
21  
22 presentation or publication resulting from this study.  
23  
24  
25 f) The study team will contact family members for recruitment according to local  
26  
27 guidelines. As per local requirements, contact will be made with those individuals  
28  
29 who have expressed a willingness to at least learn about the research study. Other  
30  
31 family members will not be informed of who is and is not participating. The subject  
32  
33 will also be warned not to disclose their participation in order to protect their own  
34  
35 privacy.  
36  
37  
38  
39 g) If important clinical findings are noted during the study, the PI or other qualified  
40  
41 member of the research team will take full responsibility for disclosing the findings  
42  
43 to the patients/parents, communicating with their primary care physicians with  
44  
45 permission, and making appropriate referrals as indicated. The subject may choose  
46  
47 to seek a second opinion and/or appropriate clinical care. This might change the  
48  
49 subject's insurability as it relates to the clinical finding only. The presumption is  
50  
51 that detection of a potentially clinically significant finding will prove to be  
52  
53 beneficial to the subject in the long run.  
54  
55  
56  
57  
58  
59  
60

### Potential benefits

- Children who complete the Cogmed Working Memory Program might experience an improvement in their executive functioning. This could help them to function more effectively in school, at home, and in their social relationships.
- Subjects and their families who return for neurodevelopmental evaluation will learn about those aspects of the child's neurodevelopmental status that are assessed by the battery of tests. If the family provides consent, this information will also be shared with the pediatrician.
- If there are areas in which a subject is functioning poorly, these can be identified and recommendations for further evaluation or intervention provided, as appropriate.
- An indirect benefit may also come from the awareness that the results of this study may serve to help improve the care of children with similar problems in the future. CHD patients and their families may derive a sense of altruism, accomplishment, and contribution to furthering understanding of the problem through their participation.

### Risk/Benefit Ratio and importance of information to be obtained

The risk/benefit ratio is favorable for this study, for the following reasons:

1. The baseline risk is minimal because adverse events are extraordinarily unlikely.
2. Although an individual subject may not benefit from participation, the results of this study will make important contributions to understanding potential treatment of executive function deficits.
3. The CogMed intervention has never been studied in children with CHD.

- 1
- 2
- 3
- 4 4. The in-person evaluation for subjects in both treatment groups will provide accurate and
- 5 rich information about neurocognitive function for use by patients, their families, and
- 6 schools.
- 7
- 8
- 9
- 10
- 11 5. Data generated from this study will provide guidance that can be provided to parents and
- 12 medical care providers of patients with congenital heart disease.
- 13
- 14
- 15

### 16 **Safety assessment and monitoring**

17  
18 Because no physical interventions will take place, the likelihood of significant adverse events  
19 related to the study are relatively small.  
20  
21

- 22
- 23
- 24 a) Specification of Safety Parameters: Any complication during a study evaluation or  
25 occurring within 24 hours of a study evaluation will be considered an adverse event and  
26 reported as described below.  
27  
28
- 29
- 30
- 31 b) Recording and Reporting Adverse Events: This study is not an intervention study.  
32 However, a major component of safety monitoring is ascertainment and reporting of  
33 adverse events (AE), including adverse reactions to study procedures. The approach to  
34 these activities for this study is summarized in the sections that follow.  
35  
36
- 37
- 38
- 39
- 40
- 41 c) Definitions of Adverse Event, Suspected Adverse Reaction and Adverse Reaction: For the  
42 purposes of this study, adverse events will include any untoward event that occurs during  
43 or in close proximity to any study related evaluation including the battery of  
44 neurodevelopmental assessments.  
45  
46
- 47
- 48
- 49
- 50
- 51 d) Classification of Adverse Events: Monitoring AEs requires that they be classified as to  
52 seriousness, expectedness, and potential relationship to the study, of which drive the  
53 reporting process.  
54  
55  
56  
57  
58  
59  
60

1  
2  
3 (1) *Seriousness*  
4  
5

6 ii) A serious adverse event (SAE) is one that:  
7

8 (1) Results in death,  
9

10  
11 (2) Is life-threatening (the subject was, in the view of the Principal Investigator, in  
12 immediate danger of death from the event as it occurred),  
13  
14

15  
16 (3) Requires inpatient hospitalization or prolongation of existing hospitalization,  
17  
18

19 (4) Results in persistent or significant incapacity or substantial disruption of the ability  
20 to conduct normal life functions, or  
21  
22

23 (5) Is an important medical event that may jeopardize the subject or may require  
24 medical/surgical intervention to prevent one of the serious adverse event outcomes.  
25  
26  
27

28  
29 The Common Terminology Criteria for Adverse Events (CTCAE) Version 4.0 MedDRA  
30

31 12.1 (<http://ctep.cancer.gov>) provides a grading system that is used to categorize the  
32 severity of adverse events, as follows:  
33  
34  
35

|    |         |                               |                                                                                                                |
|----|---------|-------------------------------|----------------------------------------------------------------------------------------------------------------|
| 36 | Grade 1 | Mild                          | Transient, requires no special treatment or intervention,<br>37<br>38 does not interfere with daily activities |
| 39 | Grade 2 | Moderate                      | Alleviated with simple treatments, may limit daily<br>40<br>41 activities                                      |
| 42 | Grade 3 | Severe                        | Requires therapeutic intervention and interrupts daily<br>43<br>44 activities                                  |
| 45 | Grade 4 | Life-<br>46<br>47 threatening | Requires therapeutic intervention and interrupts daily<br>48<br>49 activities                                  |

50  
51  
52  
53  
54  
55  
56  
57  
58  
59  
60

1  
2  
3 Or disabling  
4

5 Grade 5 Death  
6

7  
8 A AE, as defined above, encompasses CTCAE grades 4 and 5, and any Grade 3 event that  
9  
10 requires or prolongs hospitalization, or that substantially disrupts the ability of the subject  
11  
12 to conduct normal life functions.  
13

## 14 15 2. *Expectedness* 16

17  
18 The purpose of reporting is to provide new, important information on serious reactions or  
19  
20 events previously unobserved or undocumented. Therefore, all AEs will be evaluated as  
21  
22 to whether their occurrence was unexpected, using the following definitions:  
23

- 24  
25 • *Unexpected*: An unexpected AE or adverse reaction is one for which the nature or  
26  
27 severity is not consistent with information in the protocol, or consent form. An AE  
28  
29 or adverse reaction also may be categorized as unexpected if the event has not  
30  
31 previously been observed at the same specificity and/or severity.  
32  
33
- 34  
35 • *Expected*: An event is considered expected if it is known to be associated with the  
36  
37 particular evaluation  
38

## 39 3. *Causality* 40

41  
42 Causality assessment is required to determine which events require expedited reporting.  
43  
44 The following criteria will be used to determine causality:  
45

- 46  
47 • *Not Related*: The event is clearly related to other factors, such as the subject's  
48  
49 clinical state, or non-study drugs or interventions.  
50  
51  
52  
53  
54  
55  
56  
57  
58  
59



- 1  
2  
3  
4  
5  
6  
7  
8  
9  
10  
11  
12  
13  
14  
15  
16  
17  
18  
19  
20  
21  
22  
23  
24  
25  
26  
27  
28  
29  
30  
31  
32  
33  
34  
35  
36  
37  
38  
39  
40  
41  
42  
43  
44  
45  
46  
47  
48  
49  
50  
51  
52  
53  
54  
55  
56  
57  
58  
59  
60
- *Possibly Related*: The event follows a compatible temporal sequence from the time of study evaluation, but could have been produced by other factors such as the subject's clinical state or non-study drugs or interventions.
  - *Probably Related*: The event follows a reasonable temporal sequence from the time of study evaluation, and cannot be reasonably explained by other factors such as the subject's clinical state, or non-study drugs or interventions.
- g) Identification and Data Collection Procedures: AEs that are not considered adverse reactions or suspected adverse reactions will be identified when they are reported to the clinical center or during scheduled study visits by study coordinators and investigators. AEs will be assessed using self-report, physical examination data, and medical record review.
- h) Identification and Data Collection Procedures: AEs that are not considered adverse reactions or suspected adverse reactions will be identified when they are reported to the clinical center or during scheduled study visits by study coordinators and investigators. AEs will be assessed using self-report, physical examination data, and medical record review.
- i) Reporting Procedures
- Fatal or life-threatening AEs* are to be reported to the ACC within 24-hours of first knowledge of the event. Those that are unexpected and considered possibly, probably, or definitely related to the study will be reported as soon as possible, but no later than 7 calendar days after first knowledge of the event, followed by a complete report within 15

calendar days. All other fatal or life-threatening events that are unrelated to the study will be reported semiannually to the DSMB.

All other *SAEs* (*i.e.*, *non-fatal or not life-threatening*) that are unexpected and considered possibly, probably, or definitely related to the study will be reported within 24-hours of learning of the event.

All other *AEs* not meeting the criteria for expedited reporting will be reported within 7 calendar days of first knowledge of the event.

### Reporting of Adverse Events

| Seriousness                                | Reporting Timeframe                             |
|--------------------------------------------|-------------------------------------------------|
| Fatal or life threatening                  | Within 24-hours of learning of the event        |
| Serious, but not fatal or life threatening | Within 24-hours of learning of the event        |
| All other                                  | Within 7 calendar days of learning of the event |

- h) Reporting Adverse Events to Institutional Review Boards: The site Investigator or designee is responsible for reporting all serious adverse events to the local IRB in accordance with local policies and procedures.
- i) Follow-up of Subjects after Adverse Events: For AEs with a causal relationship to the study conduct, follow-up by the Investigator is required until the event or its sequelae resolve or stabilize at a level acceptable to the Investigator.

# RESEARCH CONSENT FORM

*This section only to be edited by IRB office.*

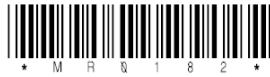

Use Plate or Print:

MRN#:

DOB:

Subject's Name:

Gender:

**Protocol Title: Improving  
Neurodevelopmental Outcomes in Children  
with Congenital Heart Disease: An  
Intervention Study**

**Principal Investigator: Jane Newburger, MD**

This consent form gives you important information about a research study. A research study helps scientists and doctors learn new information to improve medical practice and patient care.

Participation in this research study is voluntary. You are free to say yes or no and your decision will not impact the care you receive at Boston Children's Hospital. You can withdraw from the study at any time. A description of the study and its risks, potential benefits and other important information are in this consent form. Please read this consent form carefully and take your time making a decision. The form may contain words that you do not understand. Please ask questions about anything you do not understand. We encourage you to talk to others (for example, your friends, family, or other doctors) before you decide to participate in this research study.

### **How are individuals selected for this research study?**

You are being asked to participate in this research study because your child was born with a congenital heart disease and received care in the Cardiology Clinic at Boston Children's Hospital.

### **Why is this research study being conducted?**

Children with a history of congenital heart disease sometimes experience cognitive and behavioral difficulties. One of the more frequent difficulties involves what are called executive functions. These refer to processes that guide, direct, and manage one's activities (e.g., the ability to initiate and control behavior, to select relevant task goals, to shift strategies flexibly as needed). Problems in these processes can make it harder for a child to learn in school or to maintain good relationships with others. In this research study we want to learn whether children with CHD can improve their executive functioning by using a computer program called the Cogmed Working Memory Program. Although this Program has helped other groups of children with executive function problems (e.g., children born prematurely or children with conditions such as Attention Deficit Hyperactivity Disorder), it is not known whether it can help children with CHD.

### **Who is conducting this research study, and where is it being conducted?**

The study will be conducted only at Boston Children's Hospital by a team led by Dr. Jane Newburger, a pediatric cardiologist and Drs. David Bellinger and Johanna Calderon, research pediatric neuropsychologists. It is funded by a grant from the Department of Defense. Dr. Jane Newburger is the sponsor of this Non-Significant Risk investigational device study.

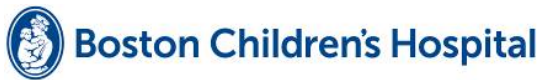

## RESEARCH CONSENT FORM

MRN: \_\_\_\_\_

Pt Name: \_\_\_\_\_

It is possible that Dr. Newburger is your child's cardiologist. Although she is an investigator in this study, your child's clinical welfare is her foremost concern. Before entering this study or at any time during the research, you may ask for a second opinion about your care from another health care provider who is in no way associated with this study. You are not under any obligation to participate in any research project offered by your health care provider. If you choose not to participate or not to allow your child to participate, your care at Boston Children's Hospital and/or with your health care provider will not be affected in any way at all.

### **How many people will participate in this research study?**

Approximately 100 7 to 12 year old children and their families will take part in this study.

### **What do I have to do if I am in this research study?**

The duration of your participation in this research study will be 4 to 5 months.

If you decide to join the research study, you will come to the Boston Children's Hospital three times in the next few months. At today's visit, your child will receive a neurodevelopmental assessment consisting of a global cognitive test, the WISC-V and a battery of cognition and executive function tasks from the National Institutes of Health (NIH) Toolbox Assessment of Neurological and Behavioral Function. These are game-like tasks and most are administered on a computer or tablet. This assessment will give us an idea of how your child is doing before receiving the Cogmed intervention and so make it easier to determine if the intervention helps. Also, you will be asked to complete 3 questionnaires that ask about your child's executive function behaviors. These are the Behavior Rating Inventory of Executive Function (BRIEF), the Connors' ADHD DSM-IV Scale (Connors), and the Social Responsiveness Scale. It will take about 45 minutes to complete these. In addition, we will ask you to give the BRIEF and the Connors' questionnaires to your child's teacher to complete. The total time of the visit will be about 2.5 hours.

Your child will then be randomly assigned to either the home-based intervention group, which will receive the Cogmed Working Memory Program, or to a control group. Randomization means that you are put into a group by chance. It is like flipping a coin. Your child will have an equal chance of being placed in the groups. Neither you nor the research investigators can choose what group you will be in. You and your child will know which group you were assigned to, though. Children in the control group will not receive the Cogmed intervention right away but will continue to receive the usual care for children with CHD, which involves surveillance for neurodevelopmental problems, and neurodevelopmental screening and counseling, as needed. When the research study is finished, you will be given the opportunity to have your child receive the same 5-week Cogmed Working Memory Training Program that children assigned to the intervention group received.

If your child is assigned to the intervention group, you will start the Cogmed intervention in the week following the first neurodevelopmental evaluation. A member of the study team will show you and your child how the Cogmed Working Memory Program works and will answer any questions you have on the first visit. Your child will be provided with an iPad on which the Program will be pre-loaded and a secured ID will be created for your child's personal use throughout the intervention. It is child-friendly and web-based. It presents different

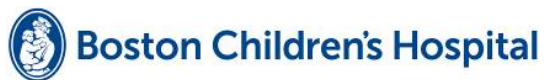

# RESEARCH CONSENT FORM

MRN: \_\_\_\_\_

Pt Name: \_\_\_\_\_

game-like tasks for your child to play. The difficulty of the tasks changes to match your child's working memory capacity, so they become more difficult as your child's working memory improves. Your child will complete 25 sessions, each of which lasts 35-40 minutes. These will be spread out over 5 weeks, so that he or she will do one session a day for 5 days per week. The iPad will record your child's responses, and we will be able to securely retrieve these data remotely. We do ask that you supervise your child over this period so help make sure that he or she completes the sessions.

For children in the Cogmed group, Visit 2 (Post-Intervention) will be completed 1 to 2 weeks after completing the Program. For children in the control group, Visit 2 will be completed 6 to 7 weeks after Visit 1. At Visit 2, children in both groups will again be administered the NIH Toolbox tasks, and parents and teachers will complete the same questionnaires they completed at Visit 1. Visit 3 (Follow-Up) will be the final phase of the study. It will take place 4 to 5 months after Visit 1. The same assessments completed at Visit 2 will be done at Visit 3. The purpose of Visit 3 is to see if the beneficial effects of the intervention at Visit 2 (should there be any) are still present after several weeks. Visits 2 and 3 will each take 2 hours.

| Study Visit Timeline                            | Visit 1 Baseline | Visit 2 Post-intervention (6-7 weeks after baseline) | Visit 3 Follow-up (4-5 months after baseline) |
|-------------------------------------------------|------------------|------------------------------------------------------|-----------------------------------------------|
| Consent /Assent                                 | X                |                                                      |                                               |
| WISC-V                                          | X                |                                                      |                                               |
| NIH Toolbox                                     | X                | X                                                    | X                                             |
| Behavior Rating Inventory of Executive Function | X                | X                                                    | X                                             |
| Connors' ADHD/DSM-IV Scale                      | X                | X                                                    | X                                             |
| Social Responsiveness Scale-2                   | X                | X                                                    | X                                             |

## What are the risks of this research study? What could go wrong?

Some procedures used in this research may present risks that are not well-known or understood. Therefore, there may be unforeseeable risks associated with participating in this research.

There are no invasive procedures involved in participating. Children in the intervention group might find it tiring to complete 5 35-40 minutes sessions per week. You may be asked questions in an interview or on a questionnaire that make you uncomfortable or cause you to remember situations that were upsetting to you. You may become frustrated if you are asked questions that you do not know how to answer. You may not be able to answer all the questions, and you do not need to answer any questions that you do not wish to answer. If

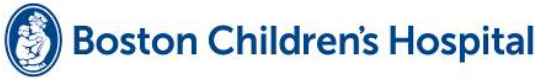

## RESEARCH CONSENT FORM

MRN: \_\_\_\_\_

Pt Name: \_\_\_\_\_

you or your child becomes upset at any time, you can stop the interview or stop completing an evaluation or a questionnaire. If you wish to speak to someone about how you are feeling, we can help you arrange this.

### **What are the benefits of this research?**

If the Cogmed Working Memory Training Program is effective, children might benefit from improved executive function abilities. All children who enroll in the study will have the opportunity to do the Program, though there will be a delay of a few months before the children randomized to the control group will be able to do so.

If any of the information collected suggests that your child might benefit from additional neuropsychological evaluation, we will tell you and discuss options for following-up.

### **Are there costs associated with this research? Will I receive any payments?**

There are no costs to you to participate in this study.

Families in both the intervention and control groups will need to return the iPad to us after the Cogmed Working Memory Training Program is completed.

Regardless of whether group your child is assigned to, the intervention or standard of care group, you will be paid \$100 after Visit 2 is completed, and your child will be given a \$25 gift card. If you and your child complete Visit 3, you will receive an additional \$100 and your child another \$25 gift card. This will add up to a total payment of \$200 to you and a total of \$50 in gift cards to your child. Parking costs will also be paid for you for all visits. In addition, if you travel from far away for the study visits, transportation costs will be covered with airfare/train for the study participant and one parent or legal guardian, vouchers for taxi transportation, parking and/or mileage reimbursement. If needed, hotel costs for 1 night will also be covered.

This research study will use a service called ClinCard® by the company Greenphire, [www.greenphire.com](http://www.greenphire.com), to manage all payments associated with your participation in study visits, your time and travel related to participation in the study. ClinCard/Greenphire will provide documentation for filing your taxes (1099 form), to the hospital, and may ask for your name and social security number using a secure website to meet that federal requirement. Boston Children's Hospital or the sponsor has contracted with ClinCard/Greenphire to provide this service but Boston Children's Hospital and ClinCard/Greenphire are separate entities and have no other relationship. ClinCard/Greenphire is solely responsible for the security of any information you provide to them.

You will be issued a ClinCard, which is a specially designed debit card for clinical research onto which your funds will be loaded as appropriate. When a study visit is completed, funds will be loaded onto your card. The funds will be available within 1 day and can be used as you wish.

Injuries sometimes happen in research even when no one is at fault. There are no plans to pay you or give you other compensation for an injury, should one occur. However, you are not giving up any of your legal rights by



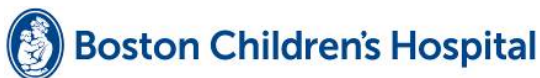

## RESEARCH CONSENT FORM

MRN: \_\_\_\_\_

Pt Name: \_\_\_\_\_

signing this form. If you think you have been injured or have experienced a medical problem as a result of taking part in this research, tell the person in charge of the research as soon as possible. The researcher's name and phone number are listed in this consent form.

### **If I do not want to take part in this research, what are the other choices?**

If you do not join this research study, your doctor can discuss other healthcare choices with you. It would be possible for your child to participate in the Cogmed Working Memory Training Program, or some other executive function training, without participating in a research study such as this one.

### **Are there other things I should know about?**

If we find out about new information from this research or other research that may affect your health, safety or willingness to stay in this research we will let you know as soon as possible.

### **Why would I be taken off the study early?**

The research investigator may take you out of this study at any time. This would happen if:

- The research is stopped.
- You are not able to attend the research visits required.
- If your child is not able to complete the Cogmed training sessions as needed.
- The research investigator feels it is in your child's best interest to be taken out of this research.

If this happens, the research investigator will tell you.

### **Other information that may help you:**

Boston Children's Hospital has developed a web-based, interactive educational program for parents called "A Parent's Guide to Medical Research." To find out more about research at Children's, please visit the program at [www.researchchildren.org](http://www.researchchildren.org).

Boston Children's Hospital is interested in hearing your comments, answering your questions, and responding to any concerns regarding clinical research. If you have questions or concerns, you may email [IRB@childrens.harvard.edu](mailto:IRB@childrens.harvard.edu) or call (617) 355-7052 between the hours of 8:30 and 5:00, Monday through Friday.

### **Who may see, use or share your health information?**

A copy of this consent form will be placed in your medical record. The results of the tests performed for research purposes will not be placed in your medical record. Because of this, it is unlikely that others within the hospital, an insurance company, or employer would ever learn of such results.

A description of this clinical trial will be available on <http://www.ClinicalTrials.gov>, as required by U.S. law. This web site will not include information that can identify you. At most, the Web site will include a summary



## RESEARCH CONSENT FORM

MRN: \_\_\_\_\_

Pt Name: \_\_\_\_\_

of the results. You can search this web site at any time. The US Food and Drug Administration has the right to inspect this study at any time.

**Contact for Future Studies:** Your participation in any research is completely voluntary and you should feel no pressure to participate if you are contacted about another research study.

**Please check and initial one** of the options below regarding future contact about other research that we do.

\_\_\_\_\_  Yes, I may be contacted about participating in other research projects studying congenital heart disease or related conditions. I give permission for my contact information (name and mailing address and/or phone number) to be given to other researchers working with the study investigator at Boston Children's Hospital.

\_\_\_\_\_  No, I do not want to be contacted about other research projects. **Do not** give my contact information to the staff of any other research studies.

### **What should you know about HIPAA and confidentiality?**

Your health information is protected by a law called the Health Information Portability and Accountability act (HIPAA). In general, anyone who is involved in this research, including those funding and regulating the study, may see the data, including information about you. For example, the following people might see information about you:

- Research staff at Boston Children's Hospital involved in this study;
- Medical staff at Boston Children's Hospital directly involved in your care that is related to the research or arises from it;
- Other researchers and centers that are a part of this study, including people who oversee research at that hospital;
- People at Boston Children's Hospital who oversee, advise, and evaluate research and care. This includes the ethics board and quality improvement program;
- People from agencies and organizations that provide accreditation and oversight of research;
- People that oversee the study information, such as data safety monitoring boards, clinical research organizations, data coordinating centers, and others;
- Sponsors or others who fund the research, including the government or private sponsors.
- Companies that manufacture drugs or devices used in this research;
- Federal and state agencies that oversee or review research information, such as the Food and Drug Administration, the Department of Health and Human Services, the National Institutes of Health, and public health and safety authorities;
- People or groups that are hired to provide services related to this research or research at Boston Children's Hospital, including services providers, such as laboratories and others;



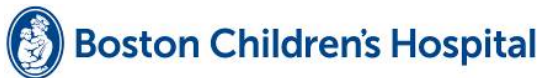

## RESEARCH CONSENT FORM

MRN: \_\_\_\_\_

Pt Name: \_\_\_\_\_

- And/or your health insurer, for portions of the research and related care that are considered billable.

If some law or court requires us to share the information, we would have to follow that law or final ruling. Some people or groups who get your health information might not have to follow the same privacy rules. Once your information is shared outside of Boston Children's Hospital, we cannot promise that it will remain private. If you decide to share private information with anyone not involved in the study, the federal law designed to protect privacy may no longer apply to this information. Other laws may or may not protect sharing of private health information. If you have a question about this, you may contact the Boston Children's Hospital Privacy Officer at (857) 218-4680, which is set up to help you understand privacy and confidentiality.

Because research is ongoing, we cannot give you an exact time when we will destroy this information. Researchers continue to use data for many years, so it is not possible to know when they will be done.

We will also create a code for the research information we collect about you so identifying information will not remain with the data and will be kept separately. The results of this research may be published in a medical book or journal or be used for teaching purposes. However, your name or identifying information will not be used without your specific permission.

### **Your privacy rights**

If you want to participate in this research study, you must sign this form. If you do not sign this form, it will not affect your care at Boston Children's Hospital now or in the future and there will be no penalty or loss of benefits. You can withdraw from the study and end your permission for Boston Children's Hospital to use or share the protected information that was collected as part of the research; however you cannot get back information that was already shared with others. Once you remove your permission, no more private health information will be collected. If you wish to withdraw your health information, please contact the research team.

You may have the right to find out if information collected for this study was shared with others for research, treatment or payment. You may not be allowed to review the information, including information recorded in your medical record, until after the study is completed. When the study is over, you will have the right to access the information again. To request the information, please contact the Hospital's Privacy Officer at (857) 218-4680.

### **Contact Information**

I understand that I may use the following contact information to reach the appropriate person/office to address any questions or concerns I may have about this study. I know:

I can call...

At

If I have questions or concerns about

Investigator:

Phone: 617-554-424

▪ General questions about the research

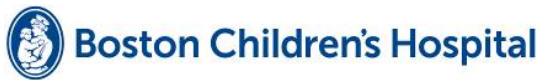

# RESEARCH CONSENT FORM

MRN: \_\_\_\_\_

Pt Name: \_\_\_\_\_

Jane Newburger

Pager: \_\_\_\_\_

- Research-related injuries or emergencies
- Any research-related concerns or complaints

Research Contact:

David C. Bellinger

Phone: 617-355-6565

Pager: \_\_\_\_\_

- General questions about the study
- Research-related injuries or emergencies
- Any research-related concerns or complaints

Institutional Review Board

Phone: 617-355-7052

- Rights of a research participant
- Use of protected health information.
- Compensation in event of research-related injury
- Any research-related concerns or complaints.
- If investigator/research contact cannot be reached.
- If I want to speak with someone other than the Investigator, Research Contact or research staff.

## Documentation of Informed Consent and Authorization

- I have read this consent form and was given enough time to consider the decision to participate in this research.
- This research has been satisfactorily explained to me, including possible risks and benefits.
- All my questions were satisfactorily answered.
- I understand that participation in this research is voluntary and that I can withdraw at any time.
- I am signing this consent form prior to participation in any research activities.
- I give permission for participation in this research and for the use of associated protected health information as described above (HIPAA).

## Parent/Legal Guardian Permission (if applicable)

**If the child to be involved in this research is a foster child or a ward of the state please notify the researcher or their staff who is obtaining your consent.**

■ \_\_\_\_\_  
 Date (MM/DD/YEAR)      Signature of **Parent #1** or **Legal Guardian**      Relationship to child

## Child Assent

- If child/adolescent's assent is **not** documented above, please indicate reason below (check one):
  - Assent is documented on a separate IRB-approved assent form
  - Child is too young
  - Other reason (e.g. sedated), please specify: \_\_\_\_\_

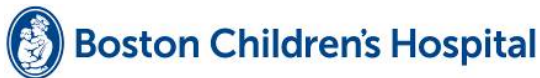

# RESEARCH CONSENT FORM

MRN: \_\_\_\_\_

Pt Name: \_\_\_\_\_

## Research Investigator /or Associate's Statement & Signature

- I have fully explained the research described above, including the possible risks and benefits, to all involved parties (participant /parents/legal guardian as applicable).
- I have answered and will answer all questions to the best of my ability.
- I will inform all involved parties of any changes (if applicable) to the research procedures or the risks and benefits during or after the course of the research.
- I have provided a copy of the consent form signed by the participant / parent / guardian and a copy of the hospital's privacy notification (if requested).

■ \_\_\_\_\_  
 Date (MM/DD/YEAR)      Signature of **Research Investigator or Associate**

## Witness Statement & Signature

A witness must be present for the entire consent process in the following situations (please check the appropriate box)

- The individual cannot read and this consent document was read to the participant or legal representative, **or**
- The individual has certain communication impairments that limit the participant's ability to clearly express consent **or**
- Situations where the IRB requests a witness be present: please specify \_\_\_\_\_

I confirm that the information in this consent form was accurately explained to the participant, parent or legally authorized representative, the individual appeared to understand the information and had the opportunity to ask questions, and that informed consent was given freely.

\_\_\_\_\_  
 Date (MM/DD/YEAR)      Signature of Witness

**Or**

The individual is not English or Spanish speaking and, through an interpreter, a short form consent document was presented orally to the participant or legal representative and this consent document serves as the summary for such consent.

I confirm that the information in this consent form was presented orally to the participant, parent or legally authorized representative, in a language they could understand and the individual had the opportunity to ask questions.

\_\_\_\_\_  
 Date (MM/DD/YEAR)      Signature of Witness

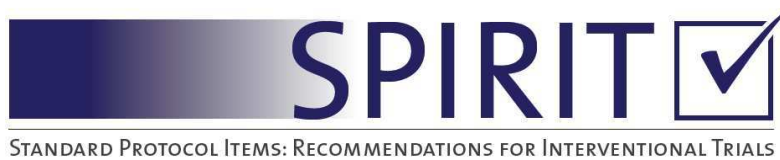

SPIRIT 2013 Checklist: Recommended items to address in a clinical trial protocol and related documents\*

| Section/item                      | Item No | Description                                                                                                                                                                                                                                                                                             |
|-----------------------------------|---------|---------------------------------------------------------------------------------------------------------------------------------------------------------------------------------------------------------------------------------------------------------------------------------------------------------|
| <b>Administrative information</b> |         |                                                                                                                                                                                                                                                                                                         |
| Title                             | 1       | Descriptive title identifying the study design, population, interventions, and, if applicable, trial acronym. <b>Page 1</b>                                                                                                                                                                             |
| Trial registration                | 2a      | Trial identifier and registry name. If not yet registered, name of intended registry. <b>Page 2</b>                                                                                                                                                                                                     |
|                                   | 2b      | All items from the World Health Organization Trial Registration Data Set. <b>Page 2, Trial Registration Number NCT03023644 on ClinicalTrials.gov</b>                                                                                                                                                    |
|                                   | 3       | Date and version identifier. <b>Page 20</b>                                                                                                                                                                                                                                                             |
| Funding                           | 4       | Sources and types of financial, material, and other support. <b>Page 27</b>                                                                                                                                                                                                                             |
| Roles and responsibilities        | 5a      | Names, affiliations, and roles of protocol contributors <b>Page 27</b>                                                                                                                                                                                                                                  |
|                                   | 5b      | Name and contact information for the trial sponsor <b>Page 27</b>                                                                                                                                                                                                                                       |
|                                   | 5c      | Role of study sponsor and funders, if any, in study design; collection, management, analysis, and interpretation of data; writing of the report; and the decision to submit the report for publication, including whether they will have ultimate authority over any of these activities <b>Page 27</b> |
|                                   | 5d      | Composition, roles, and responsibilities of the coordinating centre, steering committee, endpoint adjudication committee, data management team, and other individuals or groups overseeing the trial, if applicable (see Item 21a for data monitoring committee) <b>Page 27</b>                         |
| <b>Introduction</b>               |         |                                                                                                                                                                                                                                                                                                         |
| Background and rationale          | 6a      | Description of research question and justification for undertaking the trial, including summary of relevant studies (published and unpublished) examining benefits and harms for each intervention <b>Pages 4-8</b>                                                                                     |
|                                   | 6b      | Explanation for choice of comparators <b>Pages 4-8</b>                                                                                                                                                                                                                                                  |
| Objectives                        | 7       | Specific objectives or hypotheses <b>Pages 8-9</b>                                                                                                                                                                                                                                                      |

1  
2  
3  
4  
5  
6  
7  
8  
9  
10  
11  
12  
13  
14  
15  
16  
17  
18  
19  
20  
21  
22  
23  
24  
25  
26  
27  
28  
29  
30  
31  
32  
33  
34  
35  
36  
37  
38  
39  
40  
41  
42  
43  
44  
45  
46  
47  
48  
49  
50  
51  
52  
53  
54  
55  
56  
57  
58  
59  
60

Trial design 8 Description of trial design including type of trial (eg, parallel group, crossover, factorial, single group), allocation ratio, and framework (eg, superiority, equivalence, noninferiority, exploratory) **Page 9**

### **Methods: Participants, interventions, and outcomes**

Study setting 9 Description of study settings (eg, community clinic, academic hospital) and list of countries where data will be collected. Reference to where list of study sites can be obtained. **Page 10**

Eligibility criteria 10 Inclusion and exclusion criteria for participants. If applicable, eligibility criteria for study centres and individuals who will perform the interventions (eg, surgeons, psychotherapists). **Page 10**

Interventions 11a Interventions for each group with sufficient detail to allow replication, including how and when they will be administered **Pages 11-13**

11b Criteria for discontinuing or modifying allocated interventions for a given trial participant (eg, drug dose change in response to harms, participant request, or improving/worsening disease) **Pages 11-13**

11c Strategies to improve adherence to intervention protocols, and any procedures for monitoring adherence (eg, drug tablet return, laboratory tests) **Pages 11-13**

11d Relevant concomitant care and interventions that are permitted or prohibited during the trial **Pages 11-13**

Outcomes 12 Primary, secondary, and other outcomes, including the specific measurement variable (eg, systolic blood pressure), analysis metric (eg, change from baseline, final value, time to event), method of aggregation (eg, median, proportion), and time point for each outcome. Explanation of the clinical relevance of chosen efficacy and harm outcomes is strongly recommended. **Pages 13-17**

Participant timeline 13 Time schedule of enrolment, interventions (including any run-ins and washouts), assessments, and visits for participants. A schematic diagram is highly recommended (see Figure). **Page 17**

Sample size 14 Estimated number of participants needed to achieve study objectives and how it was determined, including clinical and statistical assumptions supporting any sample size calculations. **Pages 17-18**

Recruitment 15 Strategies for achieving adequate participant enrolment to reach target sample size. **Page 10**

### **Methods: Assignment of interventions (for controlled trials)**

Allocation:

|    |                |     |                                                                         |
|----|----------------|-----|-------------------------------------------------------------------------|
| 1  |                |     |                                                                         |
| 2  | Sequence       | 16a | Method of generating the allocation sequence (eg, computer-             |
| 3  | generation     |     | generated random numbers), and list of any factors for stratification.  |
| 4  |                |     | To reduce predictability of a random sequence, details of any planned   |
| 5  |                |     | restriction (eg, blocking) should be provided in a separate document    |
| 6  |                |     | that is unavailable to those who enrol participants or assign           |
| 7  |                |     | interventions. <b>Page 11</b>                                           |
| 8  |                |     |                                                                         |
| 9  | Allocation     | 16b | Mechanism of implementing the allocation sequence (eg, central          |
| 10 | concealment    |     | telephone; sequentially numbered, opaque, sealed envelopes),            |
| 11 | mechanism      |     | describing any steps to conceal the sequence until interventions are    |
| 12 |                |     | assigned. <b>Page 11</b>                                                |
| 13 |                |     |                                                                         |
| 14 | Implementation | 16c | Who will generate the allocation sequence, who will enrol participants, |
| 15 |                |     | and who will assign participants to interventions <b>Page 11</b>        |
| 16 |                |     |                                                                         |
| 17 | Blinding       | 17a | Who will be blinded after assignment to interventions (eg, trial        |
| 18 | (masking)      |     | participants, care providers, outcome assessors, data analysts), and    |
| 19 |                |     | how. <b>Page 9</b>                                                      |
| 20 |                |     |                                                                         |
| 21 |                | 17b | If blinded, circumstances under which unblinding is permissible, and    |
| 22 |                |     | procedure for revealing a participant's allocated intervention during   |
| 23 |                |     | the trial <b>Page 9</b>                                                 |
| 24 |                |     |                                                                         |
| 25 |                |     |                                                                         |

### Methods: Data collection, management, and analysis

|    |                 |     |                                                                             |
|----|-----------------|-----|-----------------------------------------------------------------------------|
| 26 |                 |     |                                                                             |
| 27 |                 |     |                                                                             |
| 28 | Data collection | 18a | Plans for assessment and collection of outcome, baseline, and other         |
| 29 | methods         |     | trial data, including any related processes to promote data quality (eg,    |
| 30 |                 |     | duplicate measurements, training of assessors) and a description of         |
| 31 |                 |     | study instruments (eg, questionnaires, laboratory tests) along with         |
| 32 |                 |     | their reliability and validity, if known. Reference to where data           |
| 33 |                 |     | collection forms can be found, if not in the protocol. <b>Pages 13-17</b>   |
| 34 |                 |     |                                                                             |
| 35 |                 | 18b | Plans to promote participant retention and complete follow-up,              |
| 36 |                 |     | including list of any outcome data to be collected for participants who     |
| 37 |                 |     | discontinue or deviate from intervention protocols. <b>Page 13</b>          |
| 38 |                 |     |                                                                             |
| 39 | Data            | 19  | Plans for data entry, coding, security, and storage, including any          |
| 40 | management      |     | related processes to promote data quality (eg, double data entry;           |
| 41 |                 |     | range checks for data values). Reference to where details of data           |
| 42 |                 |     | management procedures can be found, if not in the protocol. <b>Page 17-</b> |
| 43 |                 |     | <b>18 and Appendix 1.</b>                                                   |
| 44 |                 |     |                                                                             |
| 45 |                 |     |                                                                             |
| 46 | Statistical     | 20a | Statistical methods for analysing primary and secondary outcomes.           |
| 47 | methods         |     | Reference to where other details of the statistical analysis plan can be    |
| 48 |                 |     | found, if not in the protocol. <b>Pages 18-21</b>                           |
| 49 |                 |     |                                                                             |
| 50 |                 | 20b | Methods for any additional analyses (eg, subgroup and adjusted              |
| 51 |                 |     | analyses) <b>Pages 18-21</b>                                                |
| 52 |                 |     |                                                                             |
| 53 |                 | 20c | Definition of analysis population relating to protocol non-adherence        |
| 54 |                 |     | (eg, as randomised analysis), and any statistical methods to handle         |
| 55 |                 |     | missing data (eg, multiple imputation) <b>Pages 18-21</b>                   |
| 56 |                 |     |                                                                             |
| 57 |                 |     |                                                                             |
| 58 |                 |     |                                                                             |
| 59 |                 |     |                                                                             |
| 60 |                 |     |                                                                             |

**Methods: Monitoring**

- 1  
2  
3  
4  
5  
6  
7  
8  
9  
10  
11  
12  
13  
14  
15  
16  
17  
18  
19  
20  
21  
22  
23
- |                 |     |                                                                                                                                                                                                                                                                                                                                                                            |
|-----------------|-----|----------------------------------------------------------------------------------------------------------------------------------------------------------------------------------------------------------------------------------------------------------------------------------------------------------------------------------------------------------------------------|
| Data monitoring | 21a | Composition of data monitoring committee (DMC); summary of its role and reporting structure; statement of whether it is independent from the sponsor and competing interests; and reference to where further details about its charter can be found, if not in the protocol. Alternatively, an explanation of why a DMC is not needed<br><b>Page 17-18 and Appendix 1.</b> |
|                 | 21b | Description of any interim analyses and stopping guidelines, including who will have access to these interim results and make the final decision to terminate the trial. <b>Page 17-18 and Appendix 1.</b>                                                                                                                                                                 |
| Harms           | 22  | Plans for collecting, assessing, reporting, and managing solicited and spontaneously reported adverse events and other unintended effects of trial interventions or trial conduct. <b>Page 18 and Appendix 1.</b>                                                                                                                                                          |
| Auditing        | 23  | Frequency and procedures for auditing trial conduct, if any, and whether the process will be independent from investigators and the sponsor. <b>Not applicable as this is a minimal risk study.</b>                                                                                                                                                                        |

**Ethics and dissemination**

- 24  
25  
26  
27  
28  
29  
30  
31  
32  
33  
34  
35  
36  
37  
38  
39  
40  
41  
42  
43  
44  
45  
46  
47  
48  
49  
50  
51  
52  
53  
54  
55  
56  
57  
58  
59  
60
- |                          |     |                                                                                                                                                                                                                                                   |
|--------------------------|-----|---------------------------------------------------------------------------------------------------------------------------------------------------------------------------------------------------------------------------------------------------|
| Research ethics approval | 24  | Plans for seeking research ethics committee/institutional review board (REC/IRB) approval. <b>Page 21</b>                                                                                                                                         |
| Protocol amendments      | 25  | Plans for communicating important protocol modifications (eg, changes to eligibility criteria, outcomes, analyses) to relevant parties (eg, investigators, REC/IRBs, trial participants, trial registries, journals, regulators). <b>Page 21.</b> |
| Consent or assent        | 26a | Who will obtain informed consent or assent from potential trial participants or authorised surrogates, and how (see Item 32). <b>Pages 11 and 20.</b>                                                                                             |
|                          | 26b | Additional consent provisions for collection and use of participant data and biological specimens in ancillary studies, if applicable                                                                                                             |
| Confidentiality          | 27  | How personal information about potential and enrolled participants will be collected, shared, and maintained in order to protect confidentiality before, during, and after the trial. <b>Page 21</b>                                              |
| Declaration of interests | 28  | Financial and other competing interests for principal investigators for the overall trial and each study site. <b>Page 26</b>                                                                                                                     |
| Access to data           | 29  | Statement of who will have access to the final trial dataset, and disclosure of contractual agreements that limit such access for investigators. <b>Page 26</b>                                                                                   |



|    |                   |     |                                                                              |
|----|-------------------|-----|------------------------------------------------------------------------------|
| 1  |                   |     |                                                                              |
| 2  | Ancillary and     | 30  | Provisions, if any, for ancillary and post-trial care, and for               |
| 3  | post-trial care   |     | compensation to those who suffer harm from trial participation.              |
| 4  |                   |     | <b>This is a minimal risk study. Risks management is presented in</b>        |
| 5  |                   |     | <b>Appendix 1.</b>                                                           |
| 6  |                   |     |                                                                              |
| 7  | Dissemination     | 31a | Plans for investigators and sponsor to communicate trial results to          |
| 8  | policy            |     | participants, healthcare professionals, the public, and other relevant       |
| 9  |                   |     | groups (eg, via publication, reporting in results databases, or other        |
| 10 |                   |     | data sharing arrangements), including any publication restrictions.          |
| 11 |                   |     | <b>Page 21</b>                                                               |
| 12 |                   |     |                                                                              |
| 13 |                   | 31b | Authorship eligibility guidelines and any intended use of professional       |
| 14 |                   |     | writers. <b>Page 21</b>                                                      |
| 15 |                   |     |                                                                              |
| 16 |                   | 31c | Plans, if any, for granting public access to the full protocol, participant- |
| 17 |                   |     | level dataset, and statistical code. <b>Page 21</b>                          |
| 18 |                   |     |                                                                              |
| 19 |                   |     |                                                                              |
| 20 | <b>Appendices</b> |     |                                                                              |
| 21 |                   |     |                                                                              |
| 22 | Informed consent  | 32  | Model consent form and other related documentation given to                  |
| 23 | materials         |     | participants and authorised surrogates. <b>Appendix 2.</b>                   |
| 24 |                   |     |                                                                              |
| 25 | Biological        | 33  | Plans for collection, laboratory evaluation, and storage of biological       |
| 26 | specimens         |     | specimens for genetic or molecular analysis in the current trial and for     |
| 27 |                   |     | future use in ancillary studies, if applicable. <b>Not applicable.</b>       |

---

28 \*It is strongly recommended that this checklist be read in conjunction with the SPIRIT 2013  
 29 Explanation & Elaboration for important clarification on the items. Amendments to the  
 30 protocol should be tracked and dated. The SPIRIT checklist is copyrighted by the SPIRIT  
 31 Group under the Creative Commons "[Attribution-NonCommercial-NoDerivs 3.0 Unported](https://creativecommons.org/licenses/by-nc-nd/3.0/)"  
 32 license.  
 33  
 34  
 35  
 36  
 37  
 38  
 39  
 40  
 41  
 42  
 43  
 44  
 45  
 46  
 47  
 48  
 49  
 50  
 51  
 52  
 53  
 54  
 55  
 56  
 57  
 58  
 59  
 60



# BMJ Open

## Improving Neurodevelopmental Outcomes in Children with Congenital Heart Disease: Protocol for a Randomized Controlled Trial of Working Memory Training

|                                 |                                                                                                                                                                                                                                                                                                                                                                                                                                                                                                                                                                                                                            |
|---------------------------------|----------------------------------------------------------------------------------------------------------------------------------------------------------------------------------------------------------------------------------------------------------------------------------------------------------------------------------------------------------------------------------------------------------------------------------------------------------------------------------------------------------------------------------------------------------------------------------------------------------------------------|
| Journal:                        | <i>BMJ Open</i>                                                                                                                                                                                                                                                                                                                                                                                                                                                                                                                                                                                                            |
| Manuscript ID                   | bmjopen-2018-023304.R2                                                                                                                                                                                                                                                                                                                                                                                                                                                                                                                                                                                                     |
| Article Type:                   | Protocol                                                                                                                                                                                                                                                                                                                                                                                                                                                                                                                                                                                                                   |
| Date Submitted by the Author:   | 22-Oct-2018                                                                                                                                                                                                                                                                                                                                                                                                                                                                                                                                                                                                                |
| Complete List of Authors:       | Calderon, Johanna; Boston Children's Hospital, Psychiatry; Harvard Medical School, Psychiatry<br>Bellinger, David; Children's Hospital Boston, Psychiatry; Harvard Medical School, Psychiatry<br>Hartigan, Catherine; Children's Hospital Boston, Cardiology<br>Lord, Alison; Children's Hospital Boston, Cardiology<br>Stopp, Christian; Children's Hospital Boston, Cardiology<br>Wypij, David ; Children's Hospital Boston, Cardiology; Harvard University T H Chan School of Public Health, Department of Biostatistics<br>Newburger, Jane; Children's Hospital Boston, Cardiology; Harvard Medical School, Pediatrics |
| <b>Primary Subject Heading</b>: | Paediatrics                                                                                                                                                                                                                                                                                                                                                                                                                                                                                                                                                                                                                |
| Secondary Subject Heading:      | Cardiovascular medicine, Mental health                                                                                                                                                                                                                                                                                                                                                                                                                                                                                                                                                                                     |
| Keywords:                       | Working Memory, Congenital heart disease < CARDIOLOGY, Executive Function Intervention, Cogmed, Infant heart surgery                                                                                                                                                                                                                                                                                                                                                                                                                                                                                                       |
|                                 |                                                                                                                                                                                                                                                                                                                                                                                                                                                                                                                                                                                                                            |

SCHOLARONE™  
Manuscripts

Running Head: Executive Function Intervention for Children with CHD

1  
2  
3  
4  
5  
6  
7  
8 **Improving Neurodevelopmental Outcomes in Children with Congenital Heart Disease:**  
9  
10 **Protocol for a Randomized Controlled Trial of Working Memory Training**  
11  
12  
13  
14  
15  
16  
17  
18

19 Johanna Calderon<sup>1,2</sup>, PhD, David C. Bellinger,<sup>1,2</sup> PhD, MSc, Catherine Hartigan<sup>3</sup>, BA,  
20  
21 Alison Lord<sup>3</sup>, BS, Christian Stopp<sup>3</sup>, MS, David Wypij<sup>3,4</sup>, PhD,  
22  
23 and Jane W. Newburger<sup>3,5</sup>, MD, MPH  
24  
25  
26  
27  
28  
29  
30

31 <sup>1</sup> Department of Psychiatry, Boston Children's Hospital, Boston, MA

32 <sup>2</sup> Department of Psychiatry, Harvard Medical School, Boston, MA

33 <sup>3</sup> Department of Cardiology, Boston Children's Hospital, Boston, MA

34 <sup>4</sup> Department of Biostatistics, Harvard T.H. Chan School of Public Health, Boston, MA

35 <sup>5</sup> Department of Pediatrics, Harvard Medical School, Boston, MA  
36  
37  
38  
39  
40

41 Corresponding author: Dr. Johanna Calderon, Department of Psychiatry, Boston Children's  
42 Hospital, 21 Autumn Street, AT110.3. Boston, MA 02115. E-mail:  
43  
44

45 [johanna.calderon@childrens.harvard.edu](mailto:johanna.calderon@childrens.harvard.edu)  
46  
47  
48  
49

50 Word count (abstract): 300

51  
52 Word Count (article body): 5277  
53  
54  
55  
56  
57  
58  
59  
60

Running Head: Executive Function Intervention for Children with CHD

## Abstract

**Introduction:** Executive function (EF) impairments are among the most prevalent neurodevelopmental morbidities in youth with congenital heart disease (CHD). To date, no studies have investigated the efficacy of cognitive interventions to improve EF outcomes in children with CHD.

**Methods and analysis:** This is a single center, single-blinded, two-arm randomized controlled trial (RCT) to test the efficacy of Cogmed Working Memory Training (Cogmed) *versus* standard of care in children with CHD after open-heart surgery in infancy. Participants will consist of 100 children with CHD aged 7-12 years who underwent open-heart surgery before the age of 12 months. Participants are randomly allocated to either an intervention group including training on the home-based Cogmed intervention for a duration of approximately 5 weeks or a control group who receive the standard of care. We will evaluate the efficacy of Cogmed at post-treatment and 3-months after completion of the intervention. Baseline, post-treatment, and 3-month follow-up assessments will include specific measures of EF, cognitive and social functioning, and Attention Deficit Hyperactivity Disorder (ADHD) symptoms. The primary outcome of this study is the change in standardized mean score on the List Sorting Working Memory test from the National Institutes of Health (NIH) Toolbox for the Assessment of Neurological and Behavioral Function. Secondary outcomes include measures of social skills, inhibitory control, cognitive flexibility, and behavioral EF as well as ADHD symptoms as measured by the Behavior Rating Inventory of Executive Function, Second Edition and the Conners 3<sup>rd</sup> Edition. The efficacy of the intervention will be evaluated by comparing within-subject differences (baseline to post-treatment, baseline to 3-month follow-up) between the two groups using an intention-to-treat analysis.

**Ethics and dissemination:** This study has received Institutional Review Board (IRB) approval from Boston's Children's Hospital IRB (P00022440) and the Human Protection Agency from the US Department of Defense.

**Trial Registration Number:** NCT03023644

Running Head: Executive Function Intervention for Children with CHD

### Strengths and limitations of this study

- To our knowledge, this is the first randomized controlled trial (RCT) investigating the efficacy of an executive function intervention in improving outcomes for children with congenital heart disease (CHD).
- The home-based Cogmed Working Memory Training (Cogmed) is among the most widely-used evidence-based programs targeting core executive function skills and will directly address the most frequent neurodevelopmental impairment for children with critical CHD that strongly impacts their ability to succeed in academic and social environments. This intervention is individually adapted to each child's own executive function level, which ensures an optimal level of performance throughout the sessions.
- As a home-based intervention, Cogmed reduces the need for hospital-based treatment visits, potentially reducing the burden for families of children with chronic health conditions such as critical CHD.
- This RCT includes computerized individual measures of neurodevelopment and parent- and teacher-rating scales of behavioral and social outcomes as well as collection of patient-specific factors to investigate their potential relationship with response to treatment.
- This is a phase II RCT with the goal of providing the first proof of concept that a cognitive intervention can improve outcomes in children with CHD. It is single-blinded (investigators are blinded to intervention status and patient characteristics but participants know their treatment group) and has a relatively short duration of follow-up (3 months).

Running Head: Executive Function Intervention for Children with CHD

## INTRODUCTION

Congenital heart lesions are among the most common birth defects,<sup>1-2</sup> as approximately 1% of infants are born with congenital heart disease (CHD). Of these, more than one-third will present with critical CHD, most broadly defined as forms of CHD requiring surgical or catheter interventions or resulting in death in the first year of life.<sup>1,3</sup> Advances in prenatal diagnosis as well as medical and surgical care have reduced mortality rates for all forms of CHD. However, evidence of central nervous system damage, including delayed brain maturation *in utero* and abnormal brain metabolism and microstructure associated with hypoxic-ischemic injury, has been reported by a wealth of studies of critical CHD.<sup>4-7</sup> A dramatic increase in the population of survivors of infant heart surgery has been accompanied by the increased recognition of their long-term postoperative morbidities. Neurodevelopmental disabilities, particularly executive function (EF) impairments, are currently the most prevalent long-term morbidity in the population with CHD.<sup>4</sup> EF refers to a set of higher-order neurocognitive abilities that serve to coordinate and organize actions towards a goal, allowing the individual to adapt to new or complex situations.<sup>8</sup> Impairments in EF manifest as behavioral dysregulation and attention problems, impaired working memory (i.e., the ability to keep information in mind and manipulate it over a short period of time), and problems with organization and planning abilities. EF is more strongly associated with school readiness than is Intelligence Quotient (IQ), predicts both mathematics and reading competence throughout the school years<sup>8-10</sup> and is strongly associated with social cognition (i.e., decoding other people's mental and emotional states and responding to rapid-paced social interactions).<sup>9</sup>

Executive dysfunction can profoundly impact all dimensions of a child's development<sup>11-14</sup> and is a core feature of attention deficit hyperactivity disorder (ADHD)<sup>15</sup> and autism spectrum

Running Head: Executive Function Intervention for Children with CHD

1  
2  
3 symptoms.<sup>16-17</sup> If untreated, deficits in EF may also predispose individuals to later addiction,<sup>18</sup>  
4  
5 eating disorders and obesity,<sup>19</sup> and risk-taking behaviors.<sup>20</sup> These adverse sequelae may carry  
6  
7 profound implications for the educational achievement, future employment, and quality of life of  
8  
9 individuals with CHD.<sup>4</sup>  
10  
11  
12  
13

### 14 15 **EF in critical CHD**

16  
17 Impairments in EF are at the heart of the neurodevelopmental phenotype associated with  
18  
19 critical CHD after open-heart surgery.<sup>21-34</sup> EF deficits in children with CHD were first reported  
20  
21 in school-aged children with dextro-transposition of the great arteries (d-TGA).<sup>25</sup> Standardized  
22  
23 neuropsychological testing showed that patients with d-TGA had substantial difficulty planning  
24  
25 and alternating between tasks, which suggested impairments in cognitive flexibility and working  
26  
27 memory as well as deficits in planning and sustained attention. On the Behavior Rating  
28  
29 Inventory of Executive Function (BRIEF), parents and teachers of adolescents with CHD  
30  
31 reported significant difficulties, particularly with regard to working memory.<sup>22</sup> Compared to  
32  
33 normative values, parents' ratings were worse by ~0.5 Standard Deviation (SD) and those of  
34  
35 teachers by ~1 SD, suggesting not only statistically significant but clinically meaningful  
36  
37 impairments. More recent findings also reported specific EF impairments in preschool and  
38  
39 school-aged children with d-TGA.<sup>21,23-24</sup> In particular, children had important difficulties in  
40  
41 behavioral regulation and cognitive control of attention, and they had worse performances on  
42  
43 verbal and visual working memory tasks. Consistent findings have been reported by studies that  
44  
45 included children with other types of critical CHD such as tetralogy of Fallot<sup>28</sup> or single ventricle  
46  
47 physiology requiring the Fontan operation.<sup>29</sup> Finally, EF impairments have been associated with  
48  
49  
50  
51  
52  
53  
54  
55  
56  
57  
58  
59  
60

Running Head: Executive Function Intervention for Children with CHD

worse psychosocial health status and worse quality of life in youth with critical CHD,<sup>31</sup> highlighting the potential impact of long-term executive dysfunction on mental health in CHD.<sup>32</sup>

### **Working memory intervention for children with CHD**

The American Heart Association (AHA) recommends routine neurodevelopmental screening of all CHD survivors.<sup>4</sup> A burgeoning literature documents the prevalence and importance of impaired EF and ADHD in CHD survivors,<sup>21-40</sup> and brain imaging studies have provided key information on the underlying disturbances in brain structure and microstructure in patients with CHD.<sup>5-7</sup> Yet to date, no trials have been undertaken to test interventions targeting EF and attention deficits in the CHD population.<sup>34</sup>

Cogmed Working Memory Training (Cogmed) is the most widely used computerized evidence-based intervention that targets EF, specifically providing intensive structured training of working memory.<sup>41-54</sup> It has been shown to improve executive performance in several clinical and non-clinical pediatric populations, including children with ADHD,<sup>41-42;46-47</sup> low working memory and low achievement,<sup>43-44</sup> and children who were born preterm or extremely low-birth weight.<sup>53-54</sup> Unlike hospital- or laboratory-based interventions, Cogmed can be implemented as a home-based intervention for children. Studies using Cogmed have shown that subjects demonstrate the ability to transfer skills to non-trained tests of working memory as well as to tasks that involve similar processes, including attention, inhibition, and non-verbal reasoning.<sup>51-53</sup> The positive effect of training has been observed on parental ratings of inattention, including the Diagnostic and Statistical Manual of Mental Disorders, fourth edition (DSM-IV) Parent Rating Scale, ADHD Rating Scale, fourth edition (ADHD-RS-IV), BRIEF, and Conners' Parent Rating

## Running Head: Executive Function Intervention for Children with CHD

Scale. Sustained improvements in behavior as measured by rating scales have also been observed in ADHD,<sup>48</sup> brain injury,<sup>49-50</sup> and non-clinical groups.<sup>51-52</sup>

In summary, several randomized controlled trials evaluating the use of Cogmed in healthy children<sup>44; 51-52</sup> and in children with various conditions<sup>41-42;47;53-54</sup> have demonstrated that this neurocognitive intervention produces significant generalized and sustained enhancement on measures of EF, and also on everyday life learning and behavioral skills. It is proposed that training working memory using Cogmed is a promising intervention for school-aged children with critical CHD because: (1) it addresses the most frequent neurodevelopmental morbidities that strongly impact the ability to succeed in academic and social environments; (2) it allows for intensive and structured practice of targeted skills, with possible transfer to other neurodevelopmental domains; (3) it is individually adapted to each child's own EF levels, which ensures an optimal level of performance throughout the sessions; (4) it is closely monitored, and various parameters of the child's performance are systematically recorded (e.g., correct answers, speed at which tasks are completed); (5) it is child-friendly and rewarding, which facilitates children's compliance; and, finally, but importantly (6) as a home-based intervention, it reduces the need for hospital/clinic-based visits and multiple costs of individual therapy, potentially reducing the burden for families of children with chronic health conditions such as critical CHD.

In this project, we conduct a randomized controlled trial (RCT) to provide the first proof-of-concept that Cogmed intervention improves neurodevelopmental outcomes in children with CHD, and that the improvements persist to 3 months. We will enroll children with CHD who underwent infant open-heart surgery as this population corresponds to the highest risk category for developmental disorders and disabilities as per the AHA guidelines (Class I; Level of Evidence A).<sup>4</sup> We propose to determine immediate and 3-month post-treatment effects on both



Running Head: Executive Function Intervention for Children with CHD

laboratory-based tests and ecological measures of children's EF, ADHD, and social difficulties in everyday life. Our study will also provide insight into factors that are associated with response to treatment, identifying children who may be most likely to benefit from the intervention.

### **Aims and hypotheses**

Specific Aim 1: To evaluate the immediate efficacy of home-based Cogmed intervention for neurodevelopmental outcomes in children with CHD. We hypothesize that children who receive the Cogmed intervention, compared with controls receiving standard of care, will display greater improvement from baseline to post-treatment assessment in EF and social development, and greater reduction in symptoms of ADHD.

Our primary outcome measure will be the change in standardized mean score on the working memory test from the National Institutes of Health Toolbox for the Assessment of Neurological and Behavioral Function (NIH Toolbox)<sup>55</sup> from baseline to post-treatment. Secondary outcomes include changes in standardized mean scores on tests of cognitive flexibility, attention, inhibitory control, and speed of processing from the NIH Toolbox; the Global Executive Composite from the Behavior Rating Inventory of Executive Function, 2<sup>nd</sup> Edition (BRIEF-2)<sup>56</sup>, the Global Index and the ADHD Index from the Conners 3<sup>rd</sup> Edition (Conners-3)<sup>57</sup>, and the Social Responsiveness Scale, 2<sup>nd</sup> Edition (SRS-2).<sup>58</sup>

Specific Aim 2: To assess the effects of the Cogmed intervention at 3-month follow-up. We predict that significant gains in neurodevelopmental and behavioral outcomes will persist 3 months after cessation of intervention for children who received Cogmed as compared to controls.

Running Head: Executive Function Intervention for Children with CHD

The primary and secondary outcomes will be the same as those in Specific Aim 1, except that the change in scores will be from baseline to 3-month follow-up (i.e., approximately 3 months after the last Cogmed session).

Specific Aim 3: To explore cognitive, medical, and sociodemographic factors associated with changes in neurodevelopmental and behavioral scores for children who received Cogmed intervention.

## METHODS AND ANALYSIS

### Study design

This is a single center, single-blinded, two-arm RCT to test the efficacy of Cogmed intervention *versus* standard of care in children with CHD after neonatal and/or infant open-heart surgery (n=50 in each group). All eligible subjects undergo a baseline neurodevelopmental assessment and then are randomly assigned to either the home-based Cogmed intervention or to a control group receiving the standard of care for children with CHD. All participants will undergo a post-treatment and a 3-month follow-up assessment. All investigators collecting outcome data are blinded to patients' group assignment (Cogmed intervention *versus* standard of care) and to medical and surgical histories. Participants and their parents know their group assignment and thus are not blinded. For children assigned to the Cogmed group, post-treatment assessments are performed one to two weeks after the end of the intervention (i.e., approximately 7-8 weeks after baseline assessment) and follow-up will be performed 3 months after the end of the intervention (i.e., approximately 5 months after baseline assessment). For children in the control group, post-treatment and 3-month follow-up assessments are performed approximately 7-8 weeks and 5 months after baseline assessment, respectively.

Running Head: Executive Function Intervention for Children with CHD

## Participants and recruitment

Participants are included if they meet the following criteria: (1) diagnosis of CHD requiring at least one open-heart surgery before one year of age; (2) age between 7 and 12 years at baseline assessment; (3)  $\geq 6$  months post cardiac surgery; (4) had received cardiovascular care at Boston Children's Hospital; (5) English or Spanish speaking; (6) informed consent from parent/guardian as well as assent of the child. Exclusion criteria will be: (1) diagnosed chromosomal anomalies and/or genetic syndromes; (2) severe physical and/or sensory impairments (hearing, visual, or psychomotor) that would prevent the use of the computerized program; (3) confirmed diagnosis of an autism spectrum disorder and/or severe developmental or intellectual disorder that would prevent successful completion of the planned study testing; (4) placement in a separate classroom for severe sensory, motor, language or other developmental disability receiving individual support; (5) scheduled to undergo major cardiac interventions in the 6 months following enrollment; (6) received, receiving, or scheduled to receive Cogmed or any other computerized behavioral training program targeting EF or ADHD. We will not exclude children who underwent multiple heart or other surgeries, children with a pre-existing neurological history (e.g., epilepsy, stroke) or with a history of a concurrent diagnosis of ADHD (treated or untreated). Rather, we will account for these factors in the data analysis.

Eligible children living in the United States are recruited through patient databases of Boston Children's Hospital Cardiology Clinic and affiliated New England medical centers. Families are invited to participate in the study via a mail packet and follow-up phone call. Flyers and study brochures are displayed in Boston Children's Hospital Cardiology Clinic and affiliated medical centers as well as in some local advocacy parent organizations. Participants are assessed for eligibility and enrolled by a study coordinator and a research nurse. Informed consent and

Running Head: Executive Function Intervention for Children with CHD

1  
2  
3 assent from the child are obtained by a study coordinator or a research neuropsychologist before  
4  
5 the baseline assessment at the hospital. Parents and children receive monetary compensation for  
6  
7 participation in the study. These incentives are given at the second and third visits. Additionally,  
8  
9 in order to further facilitate participants' compliance and reduce drop-outs, the second and third  
10  
11 study assessments may be completed at a child's home. The study start date (i.e., start of active  
12  
13 enrollment) was February 27, 2017 and it is anticipated that enrollment will be completed in  
14  
15 September, 2019.  
16  
17  
18  
19

### 20 **Patient and Public Involvement**

21  
22 Patients, patient/family advocacy groups, or the public were not involved in the design,  
23  
24 recruitment and conduct of this study. Participants are informed of the burden of the intervention  
25  
26 and are given the option to stop at any time point. All eligible patients completing the study will  
27  
28 receive an individual report of the results of his or her baseline assessment as well as a general  
29  
30 report on study results for the group with CHD when data analyses are completed.  
31  
32  
33

### 34 **Randomization and stratification**

35  
36  
37 All eligible subjects undergo a baseline neurodevelopmental assessment (Figure 1) and  
38  
39 then are randomly assigned to either the standard home-based Cogmed intervention group or to a  
40  
41 control group (standard of care). Allocations are assigned using a computerized system only seen  
42  
43 by the research assistant or study coordinator after confirming all eligibility criteria and consent.  
44  
45 Subjects are assigned in the order in which they are enrolled into the study. Randomization is  
46  
47 done by computerized permuted blocks design with blocks of varying sizes. Once a subject has  
48  
49 been assigned to a group, he/she will remain in the same trial arm for the duration of the study.  
50  
51  
52 The randomization scheme involves two stratification factors: type of CHD (univentricular or  
53  
54  
55  
56  
57  
58  
59  
60

Running Head: Executive Function Intervention for Children with CHD

biventricular) and baseline level of EF (a score  $<85$  or  $\geq 85$  on the working memory test from the NIH Toolbox). Figure 1 shows the flowchart of the trial design.

### **Intervention group: Home-based Cogmed Working Memory Training**

Children randomly assigned to receive the Cogmed intervention will complete the standard home-based format of the program, Cogmed RM, for children aged 7 years and older. The training program contains 12 child-friendly visual-spatial and verbal working memory tasks (e.g., remembering the order in which lamps light up on a 4x4 grid; recalling a series of numbers of increasing length on the screen). All tasks are adaptive, i.e., task complexity levels are automatically adjusted to match each child's working memory capacity, to improve performance and to limit non-compliance to the intervention due to lack of motivation. Tasks become more difficult, on a session-by-session basis, as a child's performance improves. Each training session lasts approximately 40-50 minutes, and the child is instructed to complete one session per day 5 days each week for 5 weeks, for a total of 25 sessions. The program yields individual session-by-session and task-by-task training results, including the children's responses, time spent on each task, and evolution curves. Cogmed is not FDA-regulated. Based on our specific aims, Cogmed is considered a Non-Significant Risk Device.

Study tablets (i.e., iPads) are provided to families randomized to the Cogmed group in order to standardize the method of delivery. Families receive a link for downloading a web-based software program to the tablet. The program is installed on the tablet by a study coordinator who explains how the training program works and how to log into the system and complete training. The training session and installation of the program are completed after baseline assessment and randomization. Parents and children will be actively involved, and during the installation session, children will complete several practice trials under the supervision of the study coordinator. The

## Running Head: Executive Function Intervention for Children with CHD

1  
2  
3 25 sessions will be completed by the child, supervised by a parent. For the first 5 sessions, the  
4  
5 child trains on the same set of games; on the 6<sup>th</sup> session and every 5<sup>th</sup> session thereafter, a new  
6  
7 task is introduced and replaces one of the initial tasks. At the end of each session, the child can  
8  
9 play an age-appropriate tablet game as a reward. After each session, a parent will upload the  
10  
11 results to a secure website. Families are contacted weekly to check program function and discuss  
12  
13 concerns. Compliance is automatically registered by the computerized program and is defined as  
14  
15 completing at least 20 sessions, the criterion by which children are categorized as compliant or  
16  
17 non-compliant to treatment.<sup>41-42</sup>  
18  
19  
20  
21

22 To implement this intervention, each investigator and study coordinator involved in  
23  
24 coaching is certified as a “Cogmed Coach.” The Cogmed Coaches will monitor children’s  
25  
26 performance on mycogmed.com secured website every week during the intervention to permit  
27  
28 continuous evaluation of treatment compliance and fidelity. The Cogmed coach specifically  
29  
30 monitors performance of each child and contacts the parents and the child by phone on a weekly  
31  
32 basis to discuss progression and any issues arising during the training week. A designated  
33  
34 Cogmed coach will be available during the trial to respond to any questions or help with any  
35  
36 difficulties during the training. Families and children are encouraged to continue the training for  
37  
38 at least 20 sessions. If parents or children struggle with some aspects of the intervention such as  
39  
40 the time commitment or a lack of motivation to persist with the training, the Cogmed coach  
41  
42 discusses alternative options for accommodating each individual child’s needs (i.e., rewards  
43  
44 systems available, best time of the day to practice, number of breaks necessary during each  
45  
46 session, etc.) We provide weekly feedback sessions and close monitoring in order to discourage  
47  
48 drop-outs and increase compliance with the intervention. Parents are asked to complete a training  
49  
50 evaluation scale following completion of Cogmed; this scale is an integrated component of  
51  
52  
53  
54  
55  
56  
57  
58  
59  
60

Running Head: Executive Function Intervention for Children with CHD

Cogmed that gathers information regarding the child's motivation and attention during the training as well as parents' feedback. As soon as a child finishes the intervention, a blinded post-treatment assessment will be scheduled to occur within the following weeks.

### **Control group: Standard of care**

Children randomly assigned to the control group will receive the standard of care recommended for patients with critical CHD. This includes cardiac surveillance and, if needed, neurodevelopmental counseling and screening at Boston Children's Hospital Cardiac Neurodevelopmental Program. Once enrolled in the study, a child in the control group will not receive Cogmed intervention or any other cognitive intervention that targets executive functions or ADHD symptoms until after the 3-month follow-up assessment is completed, i.e., 5-6 months after initial enrollment. Like children assigned to the intervention group, children in the control group can continue treatments that are already in place for other neurodevelopmental disabilities (e.g., speech therapy, occupational services). For children in the control group, post-treatment and 3-month follow-up assessments will be performed 6 to 7 weeks and 4 to 5 months after baseline assessment, respectively. After the study is completed, children in the control group will be offered the possibility of completing the Cogmed intervention at no cost.

### **Primary outcome measure**

The NIH Toolbox<sup>55</sup> is a set of computerized assessments designed to measure outcomes in longitudinal or intervention trials. This battery is particularly appropriate for our study because it is presented in a computerized child-friendly version, paralleling that of the Cogmed intervention. The *List Sorting Working Memory Test* from the NIH Toolbox is the primary outcome of the trial. This standardized measure assesses the ability to process information across a series of modalities (visual-spatial and verbal), to hold this information in a short-term buffer,

Running Head: Executive Function Intervention for Children with CHD

1  
2  
3 and to actively manipulate it mentally. It is considered an excellent composite indicator of  
4  
5 children's EF skills, as it requires the simultaneous implementation of control of attention and  
6  
7 working memory abilities on tasks of increasing complexity. Mean scores are automatically  
8  
9 computed and are compared to a standardization sample of US children of the same age. Scores  
10  
11 are normally distributed [mean=100, SD=15] in the standardization sample. The construct  
12  
13 validity of the NIH Toolbox working memory tasks is 0.58 for convergent validity and 0.30 for  
14  
15 divergent validity. This test has a test-retest reliability of 0.89 (95% confidence interval (CI):  
16  
17 0.85 to 0.92).  
18  
19  
20  
21

## 22 **Secondary outcome measures**

23  
24 **NIH Toolbox Cognition Battery.**<sup>55</sup> We include tests that measure cognitive flexibility, attention  
25  
26 and inhibitory control, episodic memory, language, and processing speed. Mean scores on the  
27  
28 following tests will be our secondary outcomes: (1) *Flanker Inhibitory Control and Attention*  
29  
30 *Test*, which measures a child's ability to control automatic response tendencies that may interfere  
31  
32 with achieving a goal; (2) *Dimensional Change Card Sort Test*, which assesses a child's capacity  
33  
34 to switch among multiple aspects of a task; (3) *Picture Sequence Memory Test*, which measures a  
35  
36 child's ability to remember the sequence of pictures shown on the screen; (4) *Picture Vocabulary*  
37  
38 *Test* and *Oral Reading Recognition*, which assess receptive vocabulary and reading decoding  
39  
40 skills; and (5) *Pattern Comparison Processing Speed Test*, which assesses the amount of time it  
41  
42 takes a child to process a set amount of information. All scores are standardized and normally  
43  
44 distributed (mean=100, SD=15) in the standardization sample. The test-retest reliability of these  
45  
46 tests varies between 0.82 and 0.96.  
47  
48  
49  
50  
51  
52

53 **Behavior Rating Inventory of Executive Function, Second Edition.**<sup>56</sup> The BRIEF-2 is a  
54  
55 standardized questionnaire that measures children's executive functioning in every-day life. It  
56  
57  
58  
59



Running Head: Executive Function Intervention for Children with CHD

1  
2  
3 includes nine scales: Inhibit, Self-Monitor, Shift, Emotional Control, Initiate, Working Memory,  
4 Plan/Organize, Task-Monitor, and Organization of Materials. Parent and teacher versions of the  
5 BRIEF-2 will be included. We will analyze the General Executive Composite T score (mean=50,  
6 SD=10 for the standardization sample) for each version (Parent and Teacher), which integrates a  
7 child's scores on all of the clinical scales. The composite indices of the BRIEF-2 have high  
8 internal consistency (0.94 to 0.98 in the normative sample) and high test-retest reliability (0.84 to  
9 0.88 for parents over a 2-week interval; 0.90 to 0.92 for teachers over a 3.5-week interval).

10  
11  
12  
13  
14  
15  
16  
17  
18  
19  
20 **Conners, 3<sup>rd</sup> Edition.**<sup>57</sup> The Conners-3 is a questionnaire which assesses ADHD-related  
21 behaviors in children 3 to 17 years old. We will analyze mean T scores (mean=50, SD=10 in the  
22 standardization sample) for the ADHD Inattentive and the ADHD Hyperactive-Impulsive DSM-  
23 5 Symptom Scales as well as the ADHD Index for both the Parent and Teacher versions. For  
24 children 6-11 years old, the Cronbach's alpha coefficients for scores on the scales range from  
25 0.87 to 0.95 for both parent and teacher ratings, indicating satisfactory internal consistency. Test-  
26 retest reliability for the scales ranges from 0.67 to 0.72 for parents and 0.47 to 0.80 for teachers.

27  
28  
29  
30  
31  
32  
33  
34  
35  
36 **Social Responsiveness Scale (SRS-2), Second Edition.**<sup>58</sup> The SRS-2 questionnaire evaluates  
37 autism spectrum symptoms, including those relating to social awareness, social cognition,  
38 communication, social motivation, and autistic traits, in individuals older than 2.5 years. We will  
39 analyze T scores (mean=50, SD=10 in the standardization sample) from both versions (Parent  
40 and Teacher). Ratings show good internal consistency and interrater reliability.

41  
42  
43  
44  
45  
46  
47 The schedule of neurodevelopmental data collection is presented in Table 1.

**Table 1. Schedule of neurodevelopmental assessment data collection**

|                           | Assessment                                                      | Informant | Baseline | Post-treatment* | Follow-up** |
|---------------------------|-----------------------------------------------------------------|-----------|----------|-----------------|-------------|
| <b>Primary Outcome</b>    | NIH Toolbox List Sorting Working Memory Test                    | Child     | X        | X               | X           |
|                           | NIH Toolbox Cognition Battery                                   | Child     | X        | X               | X           |
| <b>Secondary Outcomes</b> | Behavior Rating Inventory of Executive Function, Second Edition | Parent    | X        | X               | X           |
|                           |                                                                 | Teacher   | X        | X               | X           |
|                           | Conners, Third Edition                                          | Parent    | X        | X               | X           |
|                           |                                                                 | Teacher   | X        | X               | X           |
|                           | Social Responsiveness Scale, Second Edition                     | Parent    | X        | X               | X           |
|                           |                                                                 | Teacher   | X        | X               | X           |

\*Post-treatment (one to two weeks after cessation of intervention and/or 6 to 7 weeks after baseline).

\*\*3-month follow-up (3 months after completion of the intervention and/or 4 to 5 months after baseline).

### Covariate measures

We will investigate cognitive, medical, and sociodemographic patient-specific factors as predictors of response to the intervention, at both post-treatment and 3-month follow-up assessments. The following variables will be investigated: baseline Full-Scale IQ scores and all subscales on the Wechsler Intelligence Scale for Children, Fifth Edition<sup>59</sup>, and perinatal medical history, including birth weight, gestational age, type of CHD, history of neurological abnormalities, number of open-heart surgeries, intensive care unit length of stay, and total number of hospitalizations.

### Data Management and Safety Monitoring

Overall integration of the statistics, data management and administrative functions of this trial occur in the Department of Cardiology's Research Support and Statistics Core (RSSC) led by Drs. Jane Newburger and David Wypij. The RSSC provides the infrastructure necessary to

Running Head: Executive Function Intervention for Children with CHD

1  
2  
3 facilitate the conduct of this clinical trial including biostatistical analysis, computerized data  
4 entry, data base programming and development, data management, quality control, assistance  
5 with manuscript preparation and administrative functions. The RSSC provides a centralized  
6 resource for maintaining database. Study documents are being stored in individual subject  
7 folders, each folder containing a tracking page. All study materials are stored in a locked file  
8 cabinet accessible only to authorized study staff. All study data are recorded on Case Report  
9 Forms and entered into a REDCap (Research Electronic Data Capture) database.  
10  
11  
12  
13  
14  
15  
16  
17  
18

19  
20 A Data and Safety Monitoring Board (DSMB) is comprised of expert members in Cardiology,  
21 Neuropsychology and Biostatistics. Members will be independent of the study investigators and  
22 their Departments at Boston Children's Hospital as well as from the sponsors of this study. The  
23 function of the DSMB will be to advise the funding sources, Boston Children's Hospital  
24 and the study investigators on (1) final study designs and protocols prior to the  
25 beginning of data collection, (2) problems encountered protocol implementation, (3)  
26 frequency of occurrence of adverse events and their relation to study protocols, (4)  
27 withdrawals and losses to follow-up, (5) data interpretation and ethical issues, and (6)  
28 recommendations arising from the study. The DSMB Chair will receive reports of any  
29 serious events that occur in the conduct of the study. This trial has been considered as a  
30 Non-Significant Risk device study and reviewed accordingly by the Boston Children's  
31 Hospital Institutional Review Board and the Human Research Protection Office  
32 (HRPO), US Department of Defense.  
33  
34  
35  
36  
37  
38  
39  
40  
41  
42  
43  
44  
45  
46  
47  
48  
49  
50

51  
52 A complete description of this trial's data management plan, Safety Monitoring Board  
53 and Risk/Benefits Assessment is presented in Appendix 1.  
54  
55  
56  
57  
58  
59  
60

Running Head: Executive Function Intervention for Children with CHD

### Sample size and power considerations

Our specific aims are to determine whether there are significant differences between the intervention and control groups in the change in scores on the List Sorting Working Memory Test between measurements at baseline and post-treatment (Specific Aim 1) and between baseline and 3-month follow-up (Specific Aim 2). Although this test has a good test-retest reliability of  $\rho=0.87$ , to be conservative, we will assume a value of  $\rho=0.70$  between baseline and post-treatment and between baseline and 3-month follow-up on the same subject. Given a sample size of 100 subjects,  $\rho=0.70$  for within-subject correlations, and a two-sided Type I error rate of 5%, we have 81.4% power to detect a mean difference of 0.5 SD between treatment groups, with a conservative 20% attrition rate (hence, analyzing a minimum of 80 subjects) in our primary outcome measure. This corresponds to a mean difference of 7.5 units, given an expected SD of 15 for the List Sorting Working Memory Test of the NIH Toolbox.

Among children who receive the Cogmed intervention, we also seek to assess associations of cognitive, sociodemographic, and medical factors with changes in the scores for our primary outcome measure (Specific Aim 3). Given a sample size of 50 children in the Cogmed group and a two-sided Type I error rate of 5%, we have 79.9% power to detect a correlation of 0.43 (or  $R^2 = 0.43^2 = 0.185$  from a linear regression) between a patient-specific factor and the primary outcome variable even with a conservative 20% attrition rate (analyzing a minimum of 40 subjects).

### Data analysis plan

For Specific Aims 1 and 2, the efficacy of the intervention will be evaluated by comparing within-subject differences (baseline to post-treatment, baseline to 3-month follow-up,

Running Head: Executive Function Intervention for Children with CHD

and, in secondary analyses, post-treatment to 3-month follow-up) across treatment groups using an intention-to-treat analysis.

Descriptive statistics will be calculated, including means, standard deviations, medians, and interquartile ranges for continuous variables and frequency counts and percentages for categorical variables. The primary outcome measure, the List Sorting Working Memory Test of the NIH Toolbox, and most other study outcomes are continuous variables. T tests and linear regression will be used to assess differences between the intervention and control groups for continuous outcomes (i.e., differences in means, 95% CI). Proportions and logistic regression will be used to examine group differences in binary outcomes (i.e., chi square tests, odds ratios, 95% CI). We expect that randomization will produce balance between treatment groups in terms of demographic and baseline factors, but we will use regression methods to adjust for any factors that may be unbalanced. All analyses will be accompanied by graphical exploration of the data to identify outlying and influential observations. Data transformations and nonparametric methods (e.g., Wilcoxon rank sum tests) will be used as appropriate when parametric assumptions are violated. Primary analyses of treatment group differences will focus on complete cases. In secondary analyses, we will assume no change over time for subjects who do not return for their post-treatment assessment (i.e., last value carried forward approach), but we will also carry out other sensitivity analyses to assess the strength of our findings based on other missing data assumptions.

For Specific Aim 3, we will explore the associations between patient factors and within-subject differences (baseline to post-treatment, baseline to 3-month follow-up) using correlation and linear regression methods, including consideration of possible confounding or effect modification. Specific attention will be given to certain patient-specific risk factors including age

Running Head: Executive Function Intervention for Children with CHD

at first heart surgery (neonatal *versus* non-neonatal), number of surgeries and neurological complications. Because we will be conducting multiple analyses with several predictors and primary and secondary outcomes in an exploratory fashion, we will interpret results cautiously, based not only on significance levels ( $p < 0.05$ , two-tailed) but also on the magnitude of differences, correlations, or regression effects. As appropriate, we will also consider the use of other statistical methods, such as generalized additive models, partial and sparse partial least squares, and family-wise error rates, in our approach. Analyses will be conducted primarily using SAS, Stata, SPSS, and R.

## **ETHICS AND DISSEMINATION**

This study has received full Institutional Review Board (IRB) approval from Boston's Children's Hospital IRB (P00022440) and has also been reviewed and approved by the Human Protection Agency from the United States Department of Defense. Protocol modifications and amendments will be submitted to the ethical committees for approval. Amendments to the study protocol will be added to publications reporting the study outcomes. This trial has been registered with the American Clinical Trials Registry (NCT03023644). Prior to entering into the trial, all parents or legal guardians and children will give written informed consent or assent to participate. Appendix 2 presents the study consent form. All information will follow IRB and Human Protection guidelines for confidentiality and data protection. The study results will be disseminated through publications in scientific journals, presentations at scientific conferences, and directly to the families who participated in the study. Co-investigators will be co-authors of the publications describing trial outcomes, without the use of professional writers. Data will be provided upon request.

## **Trial Progress**

Running Head: Executive Function Intervention for Children with CHD

The trial is currently in the active recruitment phase (first baseline assessment February, 2017). This is Protocol V.4, 10 July 2018. Substantial protocol amendments will be communicated to investigators via email and to other parties as required. All changes are submitted to Boston Children's Hospital's IRB, to the Sponsor of this trial (US Department of Defense) and updated in [clinicaltrials.gov](http://clinicaltrials.gov).

## Discussion

This article has presents the background and design of a RCT investigating the efficacy of a 5-week working memory intervention for children with CHD who underwent open-heart surgery in infancy. This is the first study to investigate the effects of a neurocognitive intervention targeting EF in school-aged children with CHD. We will evaluate children's cognitive and social outcomes including autism spectrum and ADHD symptoms. Furthermore, the results from this trial will provide information on potential patient-specific factors associated with response to the intervention. As a first clinical trial, we will test the efficacy of the intervention at 3-months after the cessation of training. If the intervention is proven effective at this time, longer-term effects should be investigated (e.g., at 6- or 12- months post-intervention). Assessment of longer-term effects of working memory training will provide key information about the cost-efficacy of Cogmed in CHD patients, the likelihood that lasting benefits generalize to other areas of development, and the duration of its benefits.

Executive dysfunction may have cascading adverse effects on a myriad of domains ranging from specific neurocognitive abilities to school achievement, social adaptation, and, ultimately, quality of life. Timely prevention and treatment of these issues is a priority in the care of patients with CHD. If proven effective, this type of neurocognitive intervention could be implemented in a clinical outpatient practice for patients at increased neurodevelopmental risk.

Running Head: Executive Function Intervention for Children with CHD

1  
2  
3  
4  
5  
6  
7  
8  
9  
10  
11  
12  
13  
14  
15  
16  
17  
18  
19  
20  
21  
22  
23  
24  
25  
26  
27  
28  
29  
30  
31  
32  
33  
34  
35  
36  
37  
38  
39  
40  
41  
42  
43  
44  
45  
46  
47  
48  
49  
50  
51  
52  
53  
54  
55  
56  
57  
58  
59  
60

For peer review only



Running Head: Executive Function Intervention for Children with CHD

## References

1. Fyler DC. Report of the New England Regional Infant Cardiac Program. *Pediatrics*. 1980;65:S375-S461.
2. Loffredo C. Epidemiology of cardiovascular malformations: prevalence and risk factors. *Am J Med Genet*. 2000;97:319-25.
3. Ferry PC. Neurologic sequelae of cardiac surgery in children. *Am J Dis Child*. 1987;141:309-12.
4. Marino BS, Lipkin PH, Newburger JW, Peacock G, Gerdes M, Gaynor JW, Mussatto KA, Uzark K, Goldberg CS, Johnson WH, Jr., Li J, Smith SE, Bellinger DC, Mahle WT, American Heart Association Congenital Heart Defects Committee, Council on Cardiovascular Disease in the Young, Council on Cardiovascular Nursing, and Stroke Council. Neurodevelopmental outcomes in children with congenital heart disease: evaluation and management: a scientific statement from the American Heart Association. *Circulation*. 2012;126(9):1143-72.
5. Mahle WT, Tavani F, Zimmerman RA, Nicolson SC, Galli KK, Gaynor JW, Clancy RR, Montenegro LM, Spray TL, Chiavacci RM, Wernovsky G, Kurth CD. An MRI study of neurological injury before and after congenital heart surgery. *Circulation*. 2002;106(Suppl 1):109-14.
6. Miller SP, McQuillen PS, Hamrick S, Xu D, Glidden DV, Charlton N, Karl T, Azakie A, Ferriero DM, Barkovich AJ, Vigneron DB. Abnormal brain development in newborns with congenital heart disease. *N Engl J Med*. 2007;357(19):1928-38.
7. Owen M, Shevell M, Majnemer A, Limperopoulos C. Abnormal brain structure and function in newborns with complex congenital heart defects before open heart surgery: a review of the evidence. *J Child Neurol*. 2011;26(6):743-55.
8. Diamond A. Executive functions. *Annu Rev Psychol*. 2012;64:135.
9. Blair C, Razza RP. Relating effortful control, executive function, and false belief understanding to emerging math and literacy ability in kindergarten. *Child Dev*. 2007;78(2):647-63.
10. Diamond A, Barnett WS, Thomas J, Munro S. Preschool program improves cognitive control. *Science*. 2007;318(5855):1387-8.
11. Bull R, Scerif G. Executive functioning as a predictor of children's mathematics ability: inhibition, switching, and working memory. *Dev Neuropsychol*. 2001;19(3):273-93.
12. Biederman J, Monuteaux MC, Doyle AE, Seidman LJ, Wilens TE, Ferrero F, Morgan CL, Faraone SV. Impact of executive function deficits and attention-deficit/hyperactivity disorder (ADHD) on academic outcomes in children. *J Consult Clin Psychol*. 2004;72(5):757-66.
13. Espy KA, McDiarmid MM, Cwik MF, Stalets MM, Hamby A, Senn TE. The contribution of executive functions to emergent mathematic skills in preschool children. *Dev Neuropsychol*. 2004;26(1):465-86.
14. Diamond A. Normal development of prefrontal cortex from birth to young adulthood: cognitive functions, anatomy, and biochemistry. In: Stuss D, Knight, RT, editor. *Principles of Frontal Lobe Function*. New York, NY: Oxford University Press; 2002. p. 466-503.

## Running Head: Executive Function Intervention for Children with CHD

15. Barkley RA. Distinguishing sluggish cognitive tempo from ADHD in children and adolescents: executive functioning, impairment, and comorbidity. *J Clin Child Adolesc Psychol.* 2013;42(2):161-73.
16. Lai MC, Lombardo MV, Baron-Cohen S. Autism. *Lancet.* 2014;383(9920):896-910.
17. Pellicano E. Individual differences in executive function and central coherence predict developmental changes in theory of mind in autism. *Dev Psychol.* 2010;46(2):530-44.
18. Baler RD, Volkow ND. Drug addiction: the neurobiology of disrupted self-control. *Trends Mol Med.* 2006;12(12):559-66.
19. Miller AL, Lee HJ, Lumeng JC. Obesity-associated biomarkers and executive function in children. *Pediatr Res.* 2015;77(1-2):143-7.
20. Levy S, Katusic SK, Colligan RC, Weaver AL, Killian JM, Voigt RG, Barbaresi WJ. Childhood ADHD and risk for substance dependence in adulthood: a longitudinal, population-based study. *PLoS One.* 2014;9(8):e105640.
21. Calderon J, Jambaque I, Bonnet D, Angeard N. Executive functions development in 5- to 7-year-old children with transposition of the great arteries: a longitudinal study. *Dev Neuropsychol.* 2014;39(5):365-84.
22. Bellinger DC, Wypij D, Rivkin MJ, DeMaso DR, Robertson RL, Jr., Dunbar-Masterson C, Rappaport LA, Wernovsky G, Jonas RA, Newburger JW. Adolescents with d-transposition of the great arteries corrected with the arterial switch procedure: neuropsychological assessment and structural brain imaging. *Circulation.* 2011;124(12):1361-9.
23. Calderon J, Bonnet D, Courtin C, Concordet S, Plumet MH, Angeard N. Executive function and theory of mind in school-aged children after neonatal corrective cardiac surgery for transposition of the great arteries. *Dev Med Child Neurol.* 2010;52(12):1139-44.
24. Calderon J, Angeard N, Moutier S, Plumet MH, Jambaque I, Bonnet D. Impact of prenatal diagnosis on neurocognitive outcomes in children with transposition of the great arteries. *J Pediatr.* 2012;161(1):94-8 e1.
25. Bellinger DC, Wypij D, duDuplessis AJ, Rappaport LA, Jonas RA, Wernovsky G, Newburger JW. Neurodevelopmental status at eight years in children with dextro-transposition of the great arteries: the Boston Circulatory Arrest Trial. *J Thorac Cardiovasc Surg.* 2003;126(5):1385-96.
26. Bellinger DC, Rivkin MJ, Demaso D, Robertson RL, Stopp C, Dunbar-Masterson C, Wypij D, Newburger JW. Adolescents with tetralogy of Fallot: neuropsychological assessment and structural brain imaging. *Cardiol Young.* 2015;25:338-47.
27. Miatton M, De Wolf D, Francois K, Thiery E, Vingerhoets G. Neuropsychological performance in school-aged children with surgically corrected congenital heart disease. *J Pediatr.* 2007;151(1):73-78.
28. Hovels-Gurich HH, Konrad K, Skorzenski D, Herpertz-Dahlmann B, Messmer BJ, Seghaye MC. Attentional dysfunction in children after corrective cardiac surgery in infancy. *Ann Thorac Surg.* 2007;83(4):1425-30.
29. Gaynor JW, Gerdes M, Nord AS, Bernbaum J, Zackai E, Wernovsky G, Clancy RR, Heagerty PJ, Solot CB, McDonald-McGinn D, Jarvik GP. Is cardiac diagnosis a predictor of neurodevelopmental outcome after cardiac surgery in infancy? *J Thorac Cardiovasc Surg.* 2010;140(6):1230-7.

## Running Head: Executive Function Intervention for Children with CHD

30. Cassidy AR, White MT, DeMaso DR, Newburger JW, Bellinger DC. Executive function in children and adolescents with critical cyanotic congenital heart disease. *J Int Neuropsychol Soc*. 2015;21(1):34-49
31. Neal AE, Stopp C, Wypij D, Bellinger DC, Dunbar-Masterson C, DeMaso DR, Newburger JW. Predictors of health-related quality of life in adolescents with tetralogy of Fallot. *J Pediatr*. 2015;166(1):132-8.
32. Calderon J, Bellinger DC. Executive function deficits in congenital heart disease: why is intervention important? *Cardiol Young*. 2015;25(7):1238-46.
33. Shillingford AJ, Glanzman MM, Ittenbach RF, Clancy RR, Gaynor JW, Wernovsky G. Inattention, hyperactivity, and school performance in a population of school-age children with complex congenital heart disease. *Pediatrics*. 2008;121(4):e759-e67.
34. Hansen E, Poole TA, Nguyen V, Lerner M, Wigal T, Shannon K, Wigal SB, Batra AS. Prevalence of ADHD symptoms in patients with congenital heart disease. *Pediatr Int*. 2012;54(6):838-43.
35. DeMaso DR, Labella M, Taylor GA, Forbes PW, Stopp C, Bellinger DC, Rivkin MJ, Wypij D, Newburger JW. Psychiatric disorders and function in adolescents with d-transposition of the great arteries. *J Pediatr*. 2014;165:760-6.
36. Newburger JW, Sleeper LA, Bellinger DC, Goldberg CS, Tabbutt S, Lu M, Mussatto KA, Williams IA, Gustafson KE, Mital S, Pike N, Sood E, Mahle WT, Cooper DS, Dunbar-Masterson C, Krawczeski CD, Lewis A, Menon SC, Pemberton VL, Ravishankar C, Atz TW, Ohye RG, Gaynor JW. Early developmental outcome in children with hypoplastic left heart syndrome and related anomalies: the single ventricle reconstruction trial. *Circulation*. 2012;125(17):2081-91.
37. Yamada DC, Porter AA, Conway JL, LeBlanc JC, Shea SE, Hancock-Friesen CL, Warren AE. Early repair of congenital heart disease associated with increased rate of attention deficit hyperactivity disorder symptoms. *Can J Cardiol*. 2013;29(12):1623-8.
38. Sistino JJ, Atz AM, Simpson KN, Ellis C, Ikonomidis JS, Bradley SM. The prevalence of attention deficit/hyperactivity disorder following neonatal aortic arch repair. *Cardiol Young*. 2015;25(4):663-9.
39. von Rhein M, Buchmann A, Hagmann C, Huber R, Klaver P, Knirsch W, Latal B. Brain volumes predict neurodevelopment in adolescents after surgery for congenital heart disease. *Brain*. 2014;137(Pt 1):268-76.
40. Schaefer C, von Rhein M, Knirsch W, Huber R, Natalucci G, Caflisch J, Landolt MA, Latal B. Neurodevelopmental outcome, psychological adjustment, and quality of life in adolescents with congenital heart disease. *Dev Med Child Neurol*. 2013;55(12):1143-9.
41. Klingberg T, Fernell E, Olesen PJ, Johnson M, Gustafsson P, Dahlstrom K, Gillberg CG, Forssberg H, Westerberg H. Computerized training of working memory in children with ADHD--a randomized, controlled trial. *J Am Acad Child Adolesc Psychiatry*. 2005;44(2):177-86.
42. Klingberg T, Forssberg H, Westerberg H. Training of working memory in children with ADHD. *J Clin Exp Neuropsychol*. 2002;24(6):781-91.
43. Holmes J, Gathercole SE, Dunning DL. Adaptive training leads to sustained enhancement of poor working memory in children. *Dev Sci*. 2009;12(4):F9-15.
44. Holmes JG, S.E. Taking working memory training from the laboratory into schools. *Educational Psychology: An International Journal of Experimental Educational Psychology*. 2014;34(4):440.

## Running Head: Executive Function Intervention for Children with CHD

- 1
- 2
- 3
- 4 45. Westerberg H, Klingberg T. Changes in cortical activity after training of working
- 5 memory--a single-subject analysis. *Physiol Behav.* 2007;92(1-2):186-92.
- 6 46. Brehmer Y, Westerberg H, Backman L. Working-memory training in younger and older
- 7 adults: training gains, transfer, and maintenance. *Front Hum Neurosci.* 2012;6:63.
- 8 47. Beck SJ, Hanson CA, Puffenberger SS, Benninger KL, Benninger WB. A controlled trial
- 9 of working memory training for children and adolescents with ADHD. *J Clin Child*
- 10 *Adolesc Psychol.* 2010;39(6):825-36.
- 11 48. Gropper RJ, Gotlieb H, Kronitz R, Tannock R. Working memory training in college
- 12 students with ADHD or LD. *J Atten Disord.* 2014;18(4):331-45.
- 13 49. Johansson B, Tornmalm M. Working memory training for patients with acquired brain
- 14 injury: effects in daily life. *Scand J Occup Ther.* 2012;19(2):176-83.
- 15 50. Lundqvist A, Grundstrom K, Samuelsson K, Ronnberg J. Computerized training of
- 16 working memory in a group of patients suffering from acquired brain injury. *Brain Inj.*
- 17 *2010;24(10):1173-83.*
- 18 51. Bergman Nutley S, Soderqvist S, Bryde S, Thorell LB, Humphreys K, Klingberg T.
- 19 Gains in fluid intelligence after training non-verbal reasoning in 4-year-old children: a
- 20 controlled, randomized study. *Dev Sci.* 2011;14(3):591-601.
- 21 52. Thorell LB, Lindqvist S, Bergman Nutley S, Bohlin G, Klingberg T. Training and
- 22 transfer effects of executive functions in preschool children. *Dev Sci.* 2009;12(1):106-13.
- 23 53. Grunewaldt KH, Lohaugen GC, Austeng D, Brubakk AM, Skranes J. Working memory
- 24 training improves cognitive function in VLBW preschoolers. *Pediatrics.*
- 25 *2013;131(3):e747-54.*
- 26 54. Lohaugen GC, Antonsen I, Haberg A, Gramstad A, Vik T, Brubakk AM, Skranes J.
- 27 Computerized working memory training improves function in adolescents born at
- 28 extremely low birth weight. *J Pediatr.* 2011;158(4):555-61 e4
- 29 55. Zelazo PD, Anderson JE, Richler J, Wallner-Allen K, Beaumont JL, Weintraub S. II.
- 30 NIH Toolbox Cognition Battery (CB): measuring executive function and attention.
- 31 *Monogr Soc Res Child Dev.* 2013;78(4):16-33.
- 32 56. Gioia GA, Isquith PK, Guy SC, Kenworthy L. Behavior rating inventory of executive
- 33 function. *Child Neuropsychol.* 2000;6(3):235-8.
- 34 57. Conners CK. *Manual for the Conners Rating Scales - Revised.* North Tonawanda, NY;
- 35 MHS Assessments; 1997.
- 36 58. Constantino JN, Davis SA, Todd RD, Schindler MK, Gross MM, Brophy SL, Metzger
- 37 LM, Shoushtari CS, Splinter R, Reich W. Validation of a brief quantitative measure of
- 38 autistic traits: comparison of the social responsiveness scale with the autism diagnostic
- 39 interview-revised. *J Autism Dev Disord.* 2003;33(4):427-33.
- 40 59. Wechsler D. *Wechsler Intelligence Scale for Children - Fifth Edition.* 5th ed:
- 41 Psychological Corporation, Inc.; 2014.
- 42
- 43
- 44
- 45
- 46
- 47
- 48
- 49
- 50
- 51
- 52
- 53
- 54
- 55
- 56
- 57
- 58
- 59
- 60

Running Head: Executive Function Intervention for Children with CHD

1  
2  
3 **Contributors** JC, DCB, and JWN are the primary investigators and together with DW designed  
4 and established this research study. JC and JWN were responsible for ethics applications and  
5  
6 and established this research study. JC and JWN were responsible for ethics applications and  
7  
8 reporting. JC, DCB, CH, and AL are responsible for data collection and implementation of the  
9  
10 intervention. JC will take lead roles on preparation for publication of the clinical outcomes of the  
11  
12 study. JWN, DCB, DW, CS, CH, and AL will contribute to the preparation of publications  
13  
14 within their respective fields of expertise. DW and CS will take on a lead role of the statistical  
15  
16 analysis for the study. JC drafted the final version of this manuscript. All authors critically  
17  
18 reviewed and approved the final version. All data from this study will be submitted to peer-  
19  
20 review journals and for presentation at national and international scientific conferences.  
21  
22

23  
24 **Funding** This research was funded by the United States Department of Defense, Clinical Trials  
25  
26 awards (grant number W81XWH-16-1-0741).  
27

28  
29 **Competing interests** No competing interests are reported. Authors do not have any commercial  
30  
31 or scientific affiliation with Pearson, Inc., distributor of Cogmed Working Memory Training.  
32

33  
34 **Ethics approval** Full ethical approval for this study has been obtained by the Boston Children's  
35  
36 Hospital's Institutional Review Board (IRB) (IRB number P00022440) and has also been  
37  
38 reviewed and approved by the Human Protection Agency from the United States Department of  
39  
40 Defense. All parent/guardians and children will give written informed consent or assent to  
41  
42 participate prior to entering into the trial.  
43  
44  
45  
46  
47  
48  
49  
50  
51  
52  
53  
54  
55  
56  
57  
58  
59  
60

Running Head: Executive Function Intervention for Children with CHD

1  
2  
3  
4  
5  
6  
7  
8  
9  
10  
11  
12  
13  
14  
15  
16  
17  
18  
19  
20  
21  
22  
23  
24  
25  
26  
27  
28  
29  
30  
31  
32  
33  
34  
35  
36  
37  
38  
39  
40  
41  
42  
43  
44  
45  
46  
47  
48  
49  
50  
51  
52  
53  
54  
55  
56  
57  
58  
59  
60

Figure 1. Flowchart of trial design (ND=neurodevelopmental)

For peer review only

1  
2  
3  
4  
5  
6  
7  
8  
9  
10  
11  
12  
13  
14  
15  
16  
17  
18  
19  
20  
21  
22  
23  
24  
25  
26  
27  
28  
29  
30  
31  
32  
33  
34  
35  
36  
37  
38  
39  
40  
41  
42  
43  
44  
45  
46  
47  
48  
49  
50  
51  
52  
53  
54  
55  
56  
57  
58  
59  
60

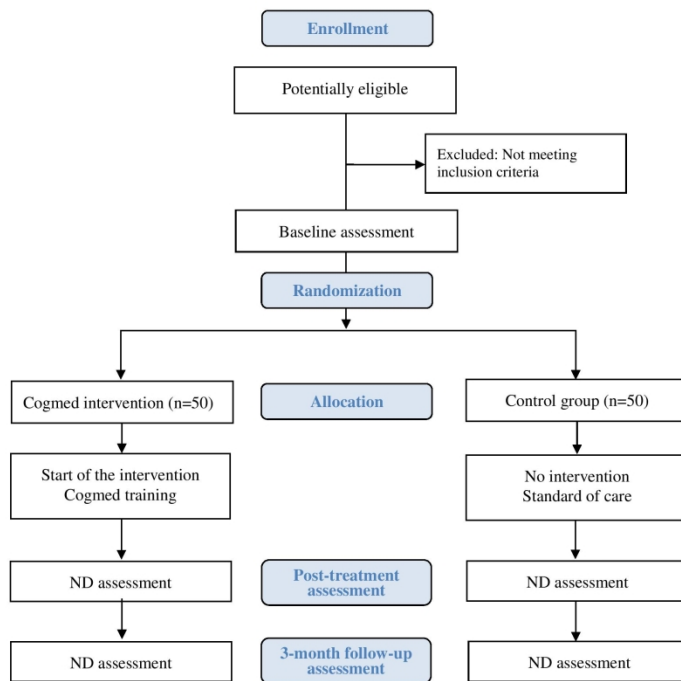

Figure 1. Study flow-chart

215x279mm (300 x 300 DPI)



## Appendix 1

Calderon J, Bellinger DC, Hartigan C, Lord A, Stopp C, Wypij D, Newburger JW. Improving Neurodevelopmental Outcomes in Children with Congenital Heart Disease: Protocol for a Randomized Controlled Trial of Working Memory Training.

- 1) Data Management and Quality Control
- 2) Data and Safety Monitoring Board
- 3) Risk/Benefits Assessment and Risk Management



## 1) Data management and quality control

Overall integration of the statistics, data management, and administrative functions of this trial will occur in the Department of Cardiology's Research Support and Statistics Core (RSSC). The RSSC will be led by Drs. Jane Newburger and David Wypij. Key support personnel in the RSSC will be a Master's level statistician/statistical programmer (Christian Stopp) and Study Coordinator (Carolyn Dunbar-Masterson).

The purposes of the Research Support and Statistics Core are as follows:

1. To support final protocol development during the Planning Phases of the clinical trial, including refinement of study design, eligibility criteria, baseline and outcome measures, power and sample size calculations, randomization methods, statistical analysis plans (including early stopping rules), and ethical considerations.
2. To assist in overall study coordination of patient follow-up, training of study personnel, quality control and quality assurance, development of Case Report Forms and Manuals of Operations, database development, data entry, database checks and updates, and maintenance of blinding and firewalls.
3. To perform statistical analyses and study monitoring (including adverse event monitoring and Data and Safety Monitoring Board reports).
4. To plan and perform final data analyses, support publication and abstract preparation, and create final data sets for archival purposes.
5. To plan and analyze ancillary studies, such as mechanistic studies or analyses of the association of clinical variables with the outcomes of the intervention.
6. To provide administrative support as needed for research excellence in the trial.

1  
2  
3 The Research Support and Statistics Core will provide the infrastructure necessary to facilitate  
4 the conduct of the proposed clinical trial. Its functions include biostatistical analysis, forms  
5 design, data base programming and development, clinical data management, quality control,  
6 clinical research study coordination, assistance with manuscript preparation, and  
7 administrative functions. It provides a centralized core of key program project staff. In addition  
8 to including facilities needed to conduct clinical research studies at Boston Children's Hospital,  
9 it provides a centralized resource for maintaining databases and facilitating quality-control  
10 procedures for all patient-related data. Individuals in the RSSC will provide computerized data  
11 entry and quality control of data. The policies, procedures, and resources already in existence  
12 in the Statistical and Data Coordinating Center of the Department of Cardiology at Boston  
13 Children's Hospital provide the infrastructure to facilitate these efforts. Computing resources  
14 and biostatistical collaboration will be provided for the design, conduct, analysis, and reporting  
15 of the trial. Computing resources will also be supported by the RSSC.  
16  
17  
18  
19  
20  
21  
22  
23  
24  
25  
26  
27  
28  
29  
30  
31  
32

33 Study documents will be stored in individual subject folders; each folder will contain a  
34 tracking page that enables study staff and investigators to record annotations and comments  
35 regarding the clinical data. All study materials will be stored in a locked file cabinet that is  
36 accessible only to authorized study staff. For data analyses, all de-identified Cogmed records will  
37 be downloaded and stored with the corresponding subject identification number for each subject.  
38 The majority of neurodevelopmental tests have a computerized format that automatically  
39 calculates children's score as a function of their performance. Subject confidentiality will be  
40 maintained by recording subject data with use of a unique subject identifier. Identifiable data, such  
41  
42  
43  
44  
45  
46  
47  
48  
49  
50  
51  
52  
53  
54  
55  
56  
57  
58  
59  
60

1  
2  
3 as contact information and medical record numbers, will be recorded and stored separately from  
4  
5 the clinical study data.  
6

7  
8 *Case Report Forms* will be developed jointly by the clinical, biostatistical, and data  
9  
10 coordination team members working on this clinical trial. Forms design features include the  
11  
12 selection of valid, reliable measurements that are less burdensome, development and testing of  
13  
14 reliability measures, pre-testing of forms, formatting of forms to ensure clarity (standard  
15  
16 conventions for coding close-ended questions, minimal use of open-ended questions), and smooth  
17  
18 flow in question patterns to reduce missing data. A detailed Manual of Operations will be  
19  
20 developed to ensure efficient, consistent, and accurate data collection and ease of communication.  
21  
22 The Manual of Operations will allow updating, as needed, using dated footers. The Case Report  
23  
24 Forms and Manual of Operations for this trial will be based on those successfully used in previous  
25  
26 studies by the investigative team.  
27  
28  
29  
30

31  
32 All study data will be recorded and maintained on Case Report Forms and entered into a  
33  
34 REDCap (Research Electronic Data Capture) database. REDCap is a secure, fully customizable,  
35  
36 web-based application designed to support data capture for clinical research studies. REDCap  
37  
38 provides user-friendly Case Report Forms, audit trails, calculated fields, queries, and the ability to  
39  
40 set up a calendar to schedule and track critical study events, such as participant visits. Auto-  
41  
42 validation, branching/skip logic, and other features provide real-time data entry validation to  
43  
44 prevent logic errors, range checks to reduce out-of-range values, context-specific help actions, and  
45  
46 conditional logic to ensure accurate data collection. Designated users from the research study team  
47  
48 can be assigned different levels of access. REDCap is designed to comply with HIPAA regulations,  
49  
50  
51  
52  
53  
54  
55  
56  
57  
58  
59  
60

1  
2  
3 and allows data export to common analysis packages such as SAS, Stata, R, or Excel. Daily  
4  
5 database backup routines are executed to ensure data safety, security, and reliability.  
6  
7

## 8 9 **2) Data and Safety Monitoring Board**

10  
11  
12 A Data and Safety Monitoring Board will be comprised of five members, each of whom is  
13  
14 eminent in one of the specific areas at issue in the study: Pediatric Cardiology, Psychiatry and  
15  
16 Neurodevelopment, and Biostatistics. Members of the DSMB must be independent of the study  
17  
18 investigators and their departments at Boston Children's Hospital. The function of the DSMB will  
19  
20 be to advise the funding sources, Boston Children's Hospital, and study investigators on: (1) final  
21  
22 study designs and protocols prior to the beginning of data collection, (2) problems with protocol  
23  
24 implementation, (3) frequency of occurrence of adverse events and their relation to study  
25  
26 protocols, (4) withdrawals and losses to follow-up, (5) data interpretation and ethical issues, and  
27  
28 (6) recommendations arising from the study. The DSMB Chair will receive reports of all serious  
29  
30 events throughout the conduct of the study. The exact schedule and procedures for monitoring or  
31  
32 stopping a study will be established by the DSMB during the first year of the study.  
33  
34  
35  
36  
37

38  
39 Research Support and Statistics Core staff will assemble and maintain the required data on  
40  
41 enrollment, adverse events and data quality for regular reporting to the DSMB, on a schedule to  
42  
43 be dictated by the DSMB, and to prepare and present such reports. The methods of analysis for the  
44  
45 clinical project and the criteria for early stopping will be developed by Dr. Wypij, with input and  
46  
47 approval from the DSMB in general and the DSMB statistician in particular. Statistical analyses  
48  
49  
50  
51  
52  
53  
54  
55  
56  
57  
58  
59  
60

1  
2  
3 pertinent to early-stopping decisions will be conducted by Dr. Wypij and presented for evaluation  
4  
5 to the DSMB on the agreed-upon schedule.  
6  
7

### 8 9 **3) Risks/Benefits Assessment**

10  
11 This trial has been considered as a Non-Significant Risk device study and reviewed accordingly  
12  
13 by the Boston Children's Hospital Institutional Review Board and the Human Research Protection  
14  
15 Office (HRPO), US Department of Defense.  
16  
17

#### 18 19 **Foreseeable risks:**

20  
21  
22 This RCT does not involve any drugs or invasive procedures, and the injury associated with  
23  
24 participation is highly unlikely. Therefore, the trial is likely to entail minimal risk to participants.  
25  
26 The NSR determination for this study will not impact the risk/benefit ratio. Participating will  
27  
28 require considerable time, particularly in the group that receives the Cogmed Working Memory  
29  
30 Training. Children in this intervention group will complete 5 35-40 minute sessions per week for  
31  
32 5 weeks. We will be asking parents to supervise the child's completion of these sessions. The  
33  
34 children might find some of the Cogmed Program activities to be frustrating. However, the system  
35  
36 is "adaptive," in that the difficulty level of the tasks is titrated to match a child's abilities, thereby  
37  
38 insuring some success and lowering stress. The families might be inconvenienced by having to  
39  
40 make three visits to Boston Children's Hospital within a 5 month period.  
41  
42  
43  
44  
45

46  
47 There is some inconvenience and burden of completing questionnaires and some families may feel  
48  
49 uncomfortable answering questions. The parent-completed questionnaires will require  
50  
51 approximately 60 minutes to complete. We will aim for questionnaires to be completed prior to  
52  
53 the in-person assessment, however there will be little time pressure required for the completion of  
54  
55  
56  
57  
58  
59  
60

1  
2  
3 the instruments by the parents and teachers as they will be mailed out to parents approximately 3  
4  
5 months prior to the appointment for the in-person evaluation.  
6  
7

8  
9 **Risk Management Response:**

- 10  
11  
12 ○ **Neurodevelopmental Testing and CogMed Intervention:** Prior to beginning the  
13  
14 evaluation, subjects and families will be told that the information they provide will be held  
15  
16 in confidence and not revealed to school officials or other authorities without their  
17  
18 permission, and that names will not be associated with answers in our database. Possible  
19  
20 referrals will be discussed with the family. Similarly, parents will be told that we are  
21  
22 required by law to report any evidence that suggests child abuse. As part of the debriefing,  
23  
24 both the child and parent will be asked if they would like additional care or services. If so,  
25  
26 we will provide referrals. If a patient's responses suggest engagement in risk-taking  
27  
28 behaviors, appropriate resources will be discussed and information provided. An  
29  
30 experienced psychiatric clinician will always be available to address with the children or  
31  
32 parents who experience any distress that the testing or questionnaires might stimulate.  
33  
34  
35  
36  
37 e) If children and/or parents exhibit any indication of suicidal thoughts or intentions, this will  
38  
39 be carefully discussed both with the parent(s) and subject. Suicidal intent, plans, and  
40  
41 means will be evaluated by a licensed clinician. Subjects judged to be at risk will be  
42  
43 referred for further evaluation and intervention. Referrals for emergency evaluation would  
44  
45 be made to our institution's Psychiatric Emergency Service or to hospitals closer to their  
46  
47 homes, if appropriate. The on-call and emergency service mental health providers will be  
48  
49 notified of the study's existence.  
50  
51  
52  
53 f) If a subject exhibits a significant depression or appears to require psychiatric  
54  
55 hospitalization, s/he will have access to referral for treatment. If during the assessment,  
56  
57  
58  
59  
60

1  
2  
3 the subject has a suicide plan or attempt or the severity of the adolescent's depression  
4 requires hospitalization, the psychiatric clinician at the participating center will facilitate  
5 hospitalization. If the subject requires additional care but does not require hospitalization,  
6 the research team will facilitate the subject's obtaining this care using his or her own health  
7 insurance.  
8  
9

- 10  
11  
12  
13  
14  
15 ○ **Ascertaining Vital Status of Subjects:** We will contact the subject's cardiologist before  
16 initiating contact with subjects and their families to be sure that the subject is alive. There  
17 is a tiny chance that the cardiologist might not have been informed about a subject's death  
18 and that we will cause distress by contacting parents of an expired subject not known to  
19 have died.  
20  
21  
22 ○ **Costs:** Tests required by the study will be provided free of charge. The study will also pay  
23 for parking for families.  
24  
25  
26 ○ **Alternatives:** Parents and children will be told that if they decline to participate, the future  
27 medical care that the child might receive at Children's Hospital in Boston will not be  
28 affected and that if they agree to participate, they are free to withdraw from the study at  
29 any time or to decline to participate in specific aspects of the study protocol.  
30  
31  
32 ○ **Confidentiality:** Investigators will take all reasonable measures to protect the  
33 confidentiality of subjects and their families, including the following:  
34  
35  
36 a) Investigators will arrange for counseling if anxious feelings arise in the family at  
37 any time during the study.  
38  
39  
40 b) Each child and parent is assigned a subject identification number (SID). All  
41 interview and clinical research data are stripped of identifiers and labeled with the  
42  
43  
44  
45  
46  
47  
48  
49  
50  
51  
52  
53  
54  
55  
56  
57  
58  
59  
60

1  
2  
3 study number. The enrollment log with participant identifiers will be maintained at  
4  
5 each site in a secured, locked location available only to the study staff.  
6  
7

- 8 c) The study will follow good clinical practices at all times. Databases will be secured  
9  
10 as previously discussed.  
11  
12  
13 d) The risk of breach of subject confidentiality will be minimized by storage of all  
14  
15 study materials in a locked file cabinet in a location separate from the laboratory  
16  
17 data.  
18  
19  
20 e) The subject's name and any other identifying information will not appear in any  
21  
22 presentation or publication resulting from this study.  
23  
24  
25 f) The study team will contact family members for recruitment according to local  
26  
27 guidelines. As per local requirements, contact will be made with those individuals  
28  
29 who have expressed a willingness to at least learn about the research study. Other  
30  
31 family members will not be informed of who is and is not participating. The subject  
32  
33 will also be warned not to disclose their participation in order to protect their own  
34  
35 privacy.  
36  
37  
38  
39 g) If important clinical findings are noted during the study, the PI or other qualified  
40  
41 member of the research team will take full responsibility for disclosing the findings  
42  
43 to the patients/parents, communicating with their primary care physicians with  
44  
45 permission, and making appropriate referrals as indicated. The subject may choose  
46  
47 to seek a second opinion and/or appropriate clinical care. This might change the  
48  
49 subject's insurability as it relates to the clinical finding only. The presumption is  
50  
51 that detection of a potentially clinically significant finding will prove to be  
52  
53 beneficial to the subject in the long run.  
54  
55  
56  
57  
58  
59



### Potential benefits

- Children who complete the Cogmed Working Memory Program might experience an improvement in their executive functioning. This could help them to function more effectively in school, at home, and in their social relationships.
- Subjects and their families who return for neurodevelopmental evaluation will learn about those aspects of the child's neurodevelopmental status that are assessed by the battery of tests. If the family provides consent, this information will also be shared with the pediatrician.
- If there are areas in which a subject is functioning poorly, these can be identified and recommendations for further evaluation or intervention provided, as appropriate.
- An indirect benefit may also come from the awareness that the results of this study may serve to help improve the care of children with similar problems in the future. CHD patients and their families may derive a sense of altruism, accomplishment, and contribution to furthering understanding of the problem through their participation.

### Risk/Benefit Ratio and importance of information to be obtained

The risk/benefit ratio is favorable for this study, for the following reasons:

1. The baseline risk is minimal because adverse events are extraordinarily unlikely.
2. Although an individual subject may not benefit from participation, the results of this study will make important contributions to understanding potential treatment of executive function deficits.
3. The CogMed intervention has never been studied in children with CHD.

- 1
- 2
- 3
- 4 4. The in-person evaluation for subjects in both treatment groups will provide accurate and
- 5 rich information about neurocognitive function for use by patients, their families, and
- 6 schools.
- 7
- 8
- 9
- 10 5. Data generated from this study will provide guidance that can be provided to parents and
- 11 medical care providers of patients with congenital heart disease.
- 12
- 13
- 14
- 15

### 16 **Safety assessment and monitoring**

17  
18 Because no physical interventions will take place, the likelihood of significant adverse events  
19 related to the study are relatively small.  
20  
21

- 22
- 23
- 24 a) Specification of Safety Parameters: Any complication during a study evaluation or  
25 occurring within 24 hours of a study evaluation will be considered an adverse event and  
26 reported as described below.  
27  
28
- 29
- 30
- 31 b) Recording and Reporting Adverse Events: This study is not an intervention study.  
32 However, a major component of safety monitoring is ascertainment and reporting of  
33 adverse events (AE), including adverse reactions to study procedures. The approach to  
34 these activities for this study is summarized in the sections that follow.  
35  
36
- 37
- 38
- 39
- 40
- 41 c) Definitions of Adverse Event, Suspected Adverse Reaction and Adverse Reaction: For the  
42 purposes of this study, adverse events will include any untoward event that occurs during  
43 or in close proximity to any study related evaluation including the battery of  
44 neurodevelopmental assessments.  
45  
46
- 47
- 48
- 49
- 50
- 51 d) Classification of Adverse Events: Monitoring AEs requires that they be classified as to  
52 seriousness, expectedness, and potential relationship to the study, of which drive the  
53 reporting process.  
54  
55  
56  
57  
58  
59  
60

1  
2  
3 (1) *Seriousness*  
4  
5

6 ii) A serious adverse event (SAE) is one that:  
7

8 (1) Results in death,  
9

10  
11 (2) Is life-threatening (the subject was, in the view of the Principal Investigator, in  
12 immediate danger of death from the event as it occurred),  
13

14  
15 (3) Requires inpatient hospitalization or prolongation of existing hospitalization,  
16

17 (4) Results in persistent or significant incapacity or substantial disruption of the ability  
18 to conduct normal life functions, or  
19

20 (5) Is an important medical event that may jeopardize the subject or may require  
21 medical/surgical intervention to prevent one of the serious adverse event outcomes.  
22  
23  
24  
25  
26  
27  
28

29 The Common Terminology Criteria for Adverse Events (CTCAE) Version 4.0 MedDRA  
30

31 12.1 (<http://ctep.cancer.gov>) provides a grading system that is used to categorize the  
32 severity of adverse events, as follows:  
33  
34  
35  
36

|    |         |                         |                                                                                                          |
|----|---------|-------------------------|----------------------------------------------------------------------------------------------------------|
| 37 | Grade 1 | Mild                    | Transient, requires no special treatment or intervention,<br>38 does not interfere with daily activities |
| 39 | Grade 2 | Moderate                | Alleviated with simple treatments, may limit daily<br>40 activities                                      |
| 41 | Grade 3 | Severe                  | Requires therapeutic intervention and interrupts daily<br>42 activities                                  |
| 43 | Grade 4 | Life-<br>44 threatening |                                                                                                          |

1  
2  
3 Or disabling  
4

5 Grade 5 Death  
6

7  
8 A AE, as defined above, encompasses CTCAE grades 4 and 5, and any Grade 3 event that  
9  
10 requires or prolongs hospitalization, or that substantially disrupts the ability of the subject  
11  
12 to conduct normal life functions.  
13

## 14 15 2. *Expectedness* 16

17  
18 The purpose of reporting is to provide new, important information on serious reactions or  
19  
20 events previously unobserved or undocumented. Therefore, all AEs will be evaluated as  
21  
22 to whether their occurrence was unexpected, using the following definitions:  
23

- 24  
25 • *Unexpected*: An unexpected AE or adverse reaction is one for which the nature or  
26  
27 severity is not consistent with information in the protocol, or consent form. An AE  
28  
29 or adverse reaction also may be categorized as unexpected if the event has not  
30  
31 previously been observed at the same specificity and/or severity.  
32  
33
- 34  
35 • *Expected*: An event is considered expected if it is known to be associated with the  
36  
37 particular evaluation  
38

## 39 3. *Causality* 40

41  
42 Causality assessment is required to determine which events require expedited reporting.  
43  
44 The following criteria will be used to determine causality:  
45

- 46  
47 • *Not Related*: The event is clearly related to other factors, such as the subject's  
48  
49 clinical state, or non-study drugs or interventions.  
50  
51  
52  
53  
54  
55  
56  
57  
58  
59  
60

- 1  
2  
3  
4  
5  
6  
7  
8  
9  
10  
11  
12  
13  
14  
15  
16  
17  
18  
19  
20  
21  
22  
23  
24  
25  
26  
27  
28  
29  
30  
31  
32  
33  
34  
35  
36  
37  
38  
39  
40  
41  
42  
43  
44  
45  
46  
47  
48  
49  
50  
51  
52  
53  
54  
55  
56  
57  
58  
59  
60
- *Possibly Related*: The event follows a compatible temporal sequence from the time of study evaluation, but could have been produced by other factors such as the subject's clinical state or non-study drugs or interventions.
  - *Probably Related*: The event follows a reasonable temporal sequence from the time of study evaluation, and cannot be reasonably explained by other factors such as the subject's clinical state, or non-study drugs or interventions.
- g) Identification and Data Collection Procedures: AEs that are not considered adverse reactions or suspected adverse reactions will be identified when they are reported to the clinical center or during scheduled study visits by study coordinators and investigators. AEs will be assessed using self-report, physical examination data, and medical record review.
- h) Identification and Data Collection Procedures: AEs that are not considered adverse reactions or suspected adverse reactions will be identified when they are reported to the clinical center or during scheduled study visits by study coordinators and investigators. AEs will be assessed using self-report, physical examination data, and medical record review.
- i) Reporting Procedures
- Fatal or life-threatening AEs* are to be reported to the ACC within 24-hours of first knowledge of the event. Those that are unexpected and considered possibly, probably, or definitely related to the study will be reported as soon as possible, but no later than 7 calendar days after first knowledge of the event, followed by a complete report within 15

calendar days. All other fatal or life-threatening events that are unrelated to the study will be reported semiannually to the DSMB.

All other *SAEs* (*i.e., non-fatal or not life-threatening*) that are unexpected and considered possibly, probably, or definitely related to the study will be reported within 24-hours of learning of the event.

All other *AEs* not meeting the criteria for expedited reporting will be reported within 7 calendar days of first knowledge of the event.

### Reporting of Adverse Events

| Seriousness                                | Reporting Timeframe                             |
|--------------------------------------------|-------------------------------------------------|
| Fatal or life threatening                  | Within 24-hours of learning of the event        |
| Serious, but not fatal or life threatening | Within 24-hours of learning of the event        |
| All other                                  | Within 7 calendar days of learning of the event |

- h) Reporting Adverse Events to Institutional Review Boards: The site Investigator or designee is responsible for reporting all serious adverse events to the local IRB in accordance with local policies and procedures.
- i) Follow-up of Subjects after Adverse Events: For AEs with a causal relationship to the study conduct, follow-up by the Investigator is required until the event or its sequelae resolve or stabilize at a level acceptable to the Investigator.

# RESEARCH CONSENT FORM

*This section only to be edited by IRB office.*

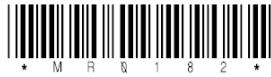

Use Plate or Print:

MRN#:

DOB:

Subject's Name:

Gender:

**Protocol Title: Improving  
Neurodevelopmental Outcomes in Children  
with Congenital Heart Disease: An  
Intervention Study**

**Principal Investigator: Jane Newburger, MD**

This consent form gives you important information about a research study. A research study helps scientists and doctors learn new information to improve medical practice and patient care.

Participation in this research study is voluntary. You are free to say yes or no and your decision will not impact the care you receive at Boston Children's Hospital. You can withdraw from the study at any time. A description of the study and its risks, potential benefits and other important information are in this consent form. Please read this consent form carefully and take your time making a decision. The form may contain words that you do not understand. Please ask questions about anything you do not understand. We encourage you to talk to others (for example, your friends, family, or other doctors) before you decide to participate in this research study.

### **How are individuals selected for this research study?**

You are being asked to participate in this research study because your child was born with a congenital heart disease and received care in the Cardiology Clinic at Boston Children's Hospital.

### **Why is this research study being conducted?**

Children with a history of congenital heart disease sometimes experience cognitive and behavioral difficulties. One of the more frequent difficulties involves what are called executive functions. These refer to processes that guide, direct, and manage one's activities (e.g., the ability to initiate and control behavior, to select relevant task goals, to shift strategies flexibly as needed). Problems in these processes can make it harder for a child to learn in school or to maintain good relationships with others. In this research study we want to learn whether children with CHD can improve their executive functioning by using a computer program called the Cogmed Working Memory Program. Although this Program has helped other groups of children with executive function problems (e.g., children born prematurely or children with conditions such as Attention Deficit Hyperactivity Disorder), it is not known whether it can help children with CHD.

### **Who is conducting this research study, and where is it being conducted?**

The study will be conducted only at Boston Children's Hospital by a team led by Dr. Jane Newburger, a pediatric cardiologist and Drs. David Bellinger and Johanna Calderon, research pediatric neuropsychologists. It is funded by a grant from the Department of Defense. Dr. Jane Newburger is the sponsor of this Non-Significant Risk investigational device study.



## RESEARCH CONSENT FORM

MRN: \_\_\_\_\_

Pt Name: \_\_\_\_\_

It is possible that Dr. Newburger is your child's cardiologist. Although she is an investigator in this study, your child's clinical welfare is her foremost concern. Before entering this study or at any time during the research, you may ask for a second opinion about your care from another health care provider who is in no way associated with this study. You are not under any obligation to participate in any research project offered by your health care provider. If you choose not to participate or not to allow your child to participate, your care at Boston Children's Hospital and/or with your health care provider will not be affected in any way at all.

### **How many people will participate in this research study?**

Approximately 100 7 to 12 year old children and their families will take part in this study.

### **What do I have to do if I am in this research study?**

The duration of your participation in this research study will be 4 to 5 months.

If you decide to join the research study, you will come to the Boston Children's Hospital three times in the next few months. At today's visit, your child will receive a neurodevelopmental assessment consisting of a global cognitive test, the WISC-V and a battery of cognition and executive function tasks from the National Institutes of Health (NIH) Toolbox Assessment of Neurological and Behavioral Function. These are game-like tasks and most are administered on a computer or tablet. This assessment will give us an idea of how your child is doing before receiving the Cogmed intervention and so make it easier to determine if the intervention helps. Also, you will be asked to complete 3 questionnaires that ask about your child's executive function behaviors. These are the Behavior Rating Inventory of Executive Function (BRIEF), the Connors' ADHD DSM-IV Scale (Connors), and the Social Responsiveness Scale. It will take about 45 minutes to complete these. In addition, we will ask you to give the BRIEF and the Connors' questionnaires to your child's teacher to complete. The total time of the visit will be about 2.5 hours.

Your child will then be randomly assigned to either the home-based intervention group, which will receive the Cogmed Working Memory Program, or to a control group. Randomization means that you are put into a group by chance. It is like flipping a coin. Your child will have an equal chance of being placed in the groups. Neither you nor the research investigators can choose what group you will be in. You and your child will know which group you were assigned to, though. Children in the control group will not receive the Cogmed intervention right away but will continue to receive the usual care for children with CHD, which involves surveillance for neurodevelopmental problems, and neurodevelopmental screening and counseling, as needed. When the research study is finished, you will be given the opportunity to have your child receive the same 5-week Cogmed Working Memory Training Program that children assigned to the intervention group received.

If your child is assigned to the intervention group, you will start the Cogmed intervention in the week following the first neurodevelopmental evaluation. A member of the study team will show you and your child how the Cogmed Working Memory Program works and will answer any questions you have on the first visit. Your child will be provided with an iPad on which the Program will be pre-loaded and a secured ID will be created for your child's personal use throughout the intervention. It is child-friendly and web-based. It presents different





# RESEARCH CONSENT FORM

MRN: \_\_\_\_\_

Pt Name: \_\_\_\_\_

game-like tasks for your child to play. The difficulty of the tasks changes to match your child's working memory capacity, so they become more difficult as your child's working memory improves. Your child will complete 25 sessions, each of which lasts 35-40 minutes. These will be spread out over 5 weeks, so that he or she will do one session a day for 5 days per week. The iPad will record your child's responses, and we will be able to securely retrieve these data remotely. We do ask that you supervise your child over this period so help make sure that he or she completes the sessions.

For children in the Cogmed group, Visit 2 (Post-Intervention) will be completed 1 to 2 weeks after completing the Program. For children in the control group, Visit 2 will be completed 6 to 7 weeks after Visit 1. At Visit 2, children in both groups will again be administered the NIH Toolbox tasks, and parents and teachers will complete the same questionnaires they completed at Visit 1. Visit 3 (Follow-Up) will be the final phase of the study. It will take place 4 to 5 months after Visit 1. The same assessments completed at Visit 2 will be done at Visit 3. The purpose of Visit 3 is to see if the beneficial effects of the intervention at Visit 2 (should there be any) are still present after several weeks. Visits 2 and 3 will each take 2 hours.

| Study Visit Timeline                            | Visit 1 Baseline | Visit 2 Post-intervention (6-7 weeks after baseline) | Visit 3 Follow-up (4-5 months after baseline) |
|-------------------------------------------------|------------------|------------------------------------------------------|-----------------------------------------------|
| Consent /Assent                                 | X                |                                                      |                                               |
| WISC-V                                          | X                |                                                      |                                               |
| NIH Toolbox                                     | X                | X                                                    | X                                             |
| Behavior Rating Inventory of Executive Function | X                | X                                                    | X                                             |
| Connors' ADHD/DSM-IV Scale                      | X                | X                                                    | X                                             |
| Social Responsiveness Scale-2                   | X                | X                                                    | X                                             |

## **What are the risks of this research study? What could go wrong?**

Some procedures used in this research may present risks that are not well-known or understood. Therefore, there may be unforeseeable risks associated with participating in this research.

There are no invasive procedures involved in participating. Children in the intervention group might find it tiring to complete 5 35-40 minutes sessions per week. You may be asked questions in an interview or on a questionnaire that make you uncomfortable or cause you to remember situations that were upsetting to you. You may become frustrated if you are asked questions that you do not know how to answer. You may not be able to answer all the questions, and you do not need to answer any questions that you do not wish to answer. If



## RESEARCH CONSENT FORM

MRN: \_\_\_\_\_

Pt Name: \_\_\_\_\_

you or your child becomes upset at any time, you can stop the interview or stop completing an evaluation or a questionnaire. If you wish to speak to someone about how you are feeling, we can help you arrange this.

### **What are the benefits of this research?**

If the Cogmed Working Memory Training Program is effective, children might benefit from improved executive function abilities. All children who enroll in the study will have the opportunity to do the Program, though there will be a delay of a few months before the children randomized to the control group will be able to do so.

If any of the information collected suggests that your child might benefit from additional neuropsychological evaluation, we will tell you and discuss options for following-up.

### **Are there costs associated with this research? Will I receive any payments?**

There are no costs to you to participate in this study.

Families in both the intervention and control groups will need to return the iPad to us after the Cogmed Working Memory Training Program is completed.

Regardless of whether group your child is assigned to, the intervention or standard of care group, you will be paid \$100 after Visit 2 is completed, and your child will be given a \$25 gift card. If you and your child complete Visit 3, you will receive an additional \$100 and your child another \$25 gift card. This will add up to a total payment of \$200 to you and a total of \$50 in gift cards to your child. Parking costs will also be paid for you for all visits. In addition, if you travel from far away for the study visits, transportation costs will be covered with airfare/train for the study participant and one parent or legal guardian, vouchers for taxi transportation, parking and/or mileage reimbursement. If needed, hotel costs for 1 night will also be covered.

This research study will use a service called ClinCard® by the company Greenphire, [www.greenphire.com](http://www.greenphire.com), to manage all payments associated with your participation in study visits, your time and travel related to participation in the study. ClinCard/Greenphire will provide documentation for filing your taxes (1099 form), to the hospital, and may ask for your name and social security number using a secure website to meet that federal requirement. Boston Children's Hospital or the sponsor has contracted with ClinCard/Greenphire to provide this service but Boston Children's Hospital and ClinCard/Greenphire are separate entities and have no other relationship. ClinCard/Greenphire is solely responsible for the security of any information you provide to them.

You will be issued a ClinCard, which is a specially designed debit card for clinical research onto which your funds will be loaded as appropriate. When a study visit is completed, funds will be loaded onto your card. The funds will be available within 1 day and can be used as you wish.

Injuries sometimes happen in research even when no one is at fault. There are no plans to pay you or give you other compensation for an injury, should one occur. However, you are not giving up any of your legal rights by

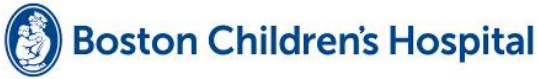

## RESEARCH CONSENT FORM

MRN: \_\_\_\_\_

Pt Name: \_\_\_\_\_

signing this form. If you think you have been injured or have experienced a medical problem as a result of taking part in this research, tell the person in charge of the research as soon as possible. The researcher's name and phone number are listed in this consent form.

### **If I do not want to take part in this research, what are the other choices?**

If you do not join this research study, your doctor can discuss other healthcare choices with you. It would be possible for your child to participate in the Cogmed Working Memory Training Program, or some other executive function training, without participating in a research study such as this one.

### **Are there other things I should know about?**

If we find out about new information from this research or other research that may affect your health, safety or willingness to stay in this research we will let you know as soon as possible.

### **Why would I be taken off the study early?**

The research investigator may take you out of this study at any time. This would happen if:

- The research is stopped.
- You are not able to attend the research visits required.
- If your child is not able to complete the Cogmed training sessions as needed.
- The research investigator feels it is in your child's best interest to be taken out of this research.

If this happens, the research investigator will tell you.

### **Other information that may help you:**

Boston Children's Hospital has developed a web-based, interactive educational program for parents called "A Parent's Guide to Medical Research." To find out more about research at Children's, please visit the program at [www.researchchildren.org](http://www.researchchildren.org).

Boston Children's Hospital is interested in hearing your comments, answering your questions, and responding to any concerns regarding clinical research. If you have questions or concerns, you may email [IRB@childrens.harvard.edu](mailto:IRB@childrens.harvard.edu) or call (617) 355-7052 between the hours of 8:30 and 5:00, Monday through Friday.

### **Who may see, use or share your health information?**

A copy of this consent form will be placed in your medical record. The results of the tests performed for research purposes will not be placed in your medical record. Because of this, it is unlikely that others within the hospital, an insurance company, or employer would ever learn of such results.

A description of this clinical trial will be available on <http://www.ClinicalTrials.gov>, as required by U.S. law. This web site will not include information that can identify you. At most, the Web site will include a summary



## RESEARCH CONSENT FORM

MRN: \_\_\_\_\_

Pt Name: \_\_\_\_\_

of the results. You can search this web site at any time. The US Food and Drug Administration has the right to inspect this study at any time.

**Contact for Future Studies:** Your participation in any research is completely voluntary and you should feel no pressure to participate if you are contacted about another research study.

**Please check and initial one** of the options below regarding future contact about other research that we do.

\_\_\_\_\_  Yes, I may be contacted about participating in other research projects studying congenital heart disease or related conditions. I give permission for my contact information (name and mailing address and/or phone number) to be given to other researchers working with the study investigator at Boston Children's Hospital.

\_\_\_\_\_  No, I do not want to be contacted about other research projects. **Do not** give my contact information to the staff of any other research studies.

### **What should you know about HIPAA and confidentiality?**

Your health information is protected by a law called the Health Information Portability and Accountability act (HIPAA). In general, anyone who is involved in this research, including those funding and regulating the study, may see the data, including information about you. For example, the following people might see information about you:

- Research staff at Boston Children's Hospital involved in this study;
- Medical staff at Boston Children's Hospital directly involved in your care that is related to the research or arises from it;
- Other researchers and centers that are a part of this study, including people who oversee research at that hospital;
- People at Boston Children's Hospital who oversee, advise, and evaluate research and care. This includes the ethics board and quality improvement program;
- People from agencies and organizations that provide accreditation and oversight of research;
- People that oversee the study information, such as data safety monitoring boards, clinical research organizations, data coordinating centers, and others;
- Sponsors or others who fund the research, including the government or private sponsors.
- Companies that manufacture drugs or devices used in this research;
- Federal and state agencies that oversee or review research information, such as the Food and Drug Administration, the Department of Health and Human Services, the National Institutes of Health, and public health and safety authorities;
- People or groups that are hired to provide services related to this research or research at Boston Children's Hospital, including services providers, such as laboratories and others;



## RESEARCH CONSENT FORM

MRN: \_\_\_\_\_

Pt Name: \_\_\_\_\_

- And/or your health insurer, for portions of the research and related care that are considered billable.

If some law or court requires us to share the information, we would have to follow that law or final ruling. Some people or groups who get your health information might not have to follow the same privacy rules. Once your information is shared outside of Boston Children's Hospital, we cannot promise that it will remain private. If you decide to share private information with anyone not involved in the study, the federal law designed to protect privacy may no longer apply to this information. Other laws may or may not protect sharing of private health information. If you have a question about this, you may contact the Boston Children's Hospital Privacy Officer at (857) 218-4680, which is set up to help you understand privacy and confidentiality.

Because research is ongoing, we cannot give you an exact time when we will destroy this information. Researchers continue to use data for many years, so it is not possible to know when they will be done.

We will also create a code for the research information we collect about you so identifying information will not remain with the data and will be kept separately. The results of this research may be published in a medical book or journal or be used for teaching purposes. However, your name or identifying information will not be used without your specific permission.

### **Your privacy rights**

If you want to participate in this research study, you must sign this form. If you do not sign this form, it will not affect your care at Boston Children's Hospital now or in the future and there will be no penalty or loss of benefits. You can withdraw from the study and end your permission for Boston Children's Hospital to use or share the protected information that was collected as part of the research; however you cannot get back information that was already shared with others. Once you remove your permission, no more private health information will be collected. If you wish to withdraw your health information, please contact the research team.

You may have the right to find out if information collected for this study was shared with others for research, treatment or payment. You may not be allowed to review the information, including information recorded in your medical record, until after the study is completed. When the study is over, you will have the right to access the information again. To request the information, please contact the Hospital's Privacy Officer at (857) 218-4680.

### **Contact Information**

I understand that I may use the following contact information to reach the appropriate person/office to address any questions or concerns I may have about this study. I know:

|               |                    |                                                                        |
|---------------|--------------------|------------------------------------------------------------------------|
| I can call... | At                 | If I have questions or concerns about                                  |
| Investigator: | Phone: 617-554-424 | <input type="checkbox"/> General questions about the research<br>_____ |



# RESEARCH CONSENT FORM

MRN: \_\_\_\_\_

Pt Name: \_\_\_\_\_

Jane Newburger

Pager: \_\_\_\_\_

- Research-related injuries or emergencies
- Any research-related concerns or complaints

Research Contact:

David C. Bellinger

Phone: 617-355-6565

Pager: \_\_\_\_\_

- General questions about the study
- Research-related injuries or emergencies
- Any research-related concerns or complaints

Institutional Review Board

Phone: 617-355-7052

- Rights of a research participant
- Use of protected health information.
- Compensation in event of research-related injury
- Any research-related concerns or complaints.
- If investigator/research contact cannot be reached.
- If I want to speak with someone other than the Investigator, Research Contact or research staff.

## Documentation of Informed Consent and Authorization

- I have read this consent form and was given enough time to consider the decision to participate in this research.
- This research has been satisfactorily explained to me, including possible risks and benefits.
- All my questions were satisfactorily answered.
- I understand that participation in this research is voluntary and that I can withdraw at any time.
- I am signing this consent form prior to participation in any research activities.
- I give permission for participation in this research and for the use of associated protected health information as described above (HIPAA).

### Parent/Legal Guardian Permission (if applicable)

**If the child to be involved in this research is a foster child or a ward of the state please notify the researcher or their staff who is obtaining your consent.**

■ \_\_\_\_\_  
 Date (MM/DD/YEAR)      Signature of **Parent #1** or **Legal Guardian**      Relationship to child

### Child Assent

- If child/adolescent's assent is **not** documented above, please indicate reason below (check one):
  - Assent is documented on a separate IRB-approved assent form
  - Child is too young
  - Other reason (e.g. sedated), please specify: \_\_\_\_\_





# RESEARCH CONSENT FORM

MRN: \_\_\_\_\_

Pt Name: \_\_\_\_\_

## Research Investigator /or Associate's Statement & Signature

- I have fully explained the research described above, including the possible risks and benefits, to all involved parties (participant /parents/legal guardian as applicable).
- I have answered and will answer all questions to the best of my ability.
- I will inform all involved parties of any changes (if applicable) to the research procedures or the risks and benefits during or after the course of the research.
- I have provided a copy of the consent form signed by the participant / parent / guardian and a copy of the hospital's privacy notification (if requested).

\_\_\_\_\_  
 Date (MM/DD/YEAR)      Signature of **Research Investigator or Associate**

## Witness Statement & Signature

A witness must be present for the entire consent process in the following situations (please check the appropriate box)

- The individual cannot read and this consent document was read to the participant or legal representative, **or**
- The individual has certain communication impairments that limit the participant's ability to clearly express consent **or**
- Situations where the IRB requests a witness be present: please specify \_\_\_\_\_

I confirm that the information in this consent form was accurately explained to the participant, parent or legally authorized representative, the individual appeared to understand the information and had the opportunity to ask questions, and that informed consent was given freely.

\_\_\_\_\_  
 Date (MM/DD/YEAR)      Signature of Witness

**Or**

The individual is not English or Spanish speaking and, through an interpreter, a short form consent document was presented orally to the participant or legal representative and this consent document serves as the summary for such consent.

I confirm that the information in this consent form was presented orally to the participant, parent or legally authorized representative, in a language they could understand and the individual had the opportunity to ask questions.

\_\_\_\_\_  
 Date (MM/DD/YEAR)      Signature of Witness

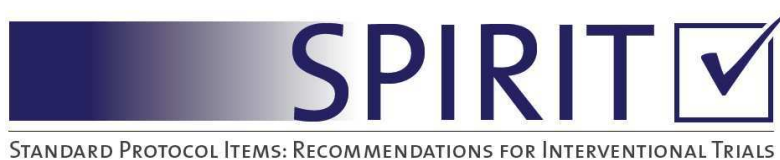

SPIRIT 2013 Checklist: Recommended items to address in a clinical trial protocol and related documents\*

| Section/item                      | Item No | Description                                                                                                                                                                                                                                                                                             |
|-----------------------------------|---------|---------------------------------------------------------------------------------------------------------------------------------------------------------------------------------------------------------------------------------------------------------------------------------------------------------|
| <b>Administrative information</b> |         |                                                                                                                                                                                                                                                                                                         |
| Title                             | 1       | Descriptive title identifying the study design, population, interventions, and, if applicable, trial acronym. <b>Page 1</b>                                                                                                                                                                             |
| Trial registration                | 2a      | Trial identifier and registry name. If not yet registered, name of intended registry. <b>Page 2</b>                                                                                                                                                                                                     |
|                                   | 2b      | All items from the World Health Organization Trial Registration Data Set. <b>Page 2, Trial Registration Number NCT03023644 on ClinicalTrials.gov</b>                                                                                                                                                    |
|                                   | 3       | Date and version identifier. <b>Page 20</b>                                                                                                                                                                                                                                                             |
| Funding                           | 4       | Sources and types of financial, material, and other support. <b>Page 27</b>                                                                                                                                                                                                                             |
| Roles and responsibilities        | 5a      | Names, affiliations, and roles of protocol contributors <b>Page 27</b>                                                                                                                                                                                                                                  |
|                                   | 5b      | Name and contact information for the trial sponsor <b>Page 27</b>                                                                                                                                                                                                                                       |
|                                   | 5c      | Role of study sponsor and funders, if any, in study design; collection, management, analysis, and interpretation of data; writing of the report; and the decision to submit the report for publication, including whether they will have ultimate authority over any of these activities <b>Page 27</b> |
|                                   | 5d      | Composition, roles, and responsibilities of the coordinating centre, steering committee, endpoint adjudication committee, data management team, and other individuals or groups overseeing the trial, if applicable (see Item 21a for data monitoring committee) <b>Page 27</b>                         |
| <b>Introduction</b>               |         |                                                                                                                                                                                                                                                                                                         |
| Background and rationale          | 6a      | Description of research question and justification for undertaking the trial, including summary of relevant studies (published and unpublished) examining benefits and harms for each intervention <b>Pages 4-8</b>                                                                                     |
|                                   | 6b      | Explanation for choice of comparators <b>Pages 4-8</b>                                                                                                                                                                                                                                                  |
| Objectives                        | 7       | Specific objectives or hypotheses <b>Pages 8-9</b>                                                                                                                                                                                                                                                      |



1  
2  
3  
4  
5  
6  
7  
8  
9  
10  
11  
12  
13  
14  
15  
16  
17  
18  
19  
20  
21  
22  
23  
24  
25  
26  
27  
28  
29  
30  
31  
32  
33  
34  
35  
36  
37  
38  
39  
40  
41  
42  
43  
44  
45  
46  
47  
48  
49  
50  
51  
52  
53  
54  
55  
56  
57  
58  
59  
60

Trial design 8 Description of trial design including type of trial (eg, parallel group, crossover, factorial, single group), allocation ratio, and framework (eg, superiority, equivalence, noninferiority, exploratory) **Page 9**

### **Methods: Participants, interventions, and outcomes**

Study setting 9 Description of study settings (eg, community clinic, academic hospital) and list of countries where data will be collected. Reference to where list of study sites can be obtained. **Page 10**

Eligibility criteria 10 Inclusion and exclusion criteria for participants. If applicable, eligibility criteria for study centres and individuals who will perform the interventions (eg, surgeons, psychotherapists). **Page 10**

Interventions 11a Interventions for each group with sufficient detail to allow replication, including how and when they will be administered **Pages 11-13**

11b Criteria for discontinuing or modifying allocated interventions for a given trial participant (eg, drug dose change in response to harms, participant request, or improving/worsening disease) **Pages 11-13**

11c Strategies to improve adherence to intervention protocols, and any procedures for monitoring adherence (eg, drug tablet return, laboratory tests) **Pages 11-13**

11d Relevant concomitant care and interventions that are permitted or prohibited during the trial **Pages 11-13**

Outcomes 12 Primary, secondary, and other outcomes, including the specific measurement variable (eg, systolic blood pressure), analysis metric (eg, change from baseline, final value, time to event), method of aggregation (eg, median, proportion), and time point for each outcome. Explanation of the clinical relevance of chosen efficacy and harm outcomes is strongly recommended. **Pages 13-17**

Participant timeline 13 Time schedule of enrolment, interventions (including any run-ins and washouts), assessments, and visits for participants. A schematic diagram is highly recommended (see Figure). **Page 17**

Sample size 14 Estimated number of participants needed to achieve study objectives and how it was determined, including clinical and statistical assumptions supporting any sample size calculations. **Pages 17-18**

Recruitment 15 Strategies for achieving adequate participant enrolment to reach target sample size. **Page 10**

### **Methods: Assignment of interventions (for controlled trials)**

Allocation:

|    |                |     |                                                                         |
|----|----------------|-----|-------------------------------------------------------------------------|
| 1  |                |     |                                                                         |
| 2  | Sequence       | 16a | Method of generating the allocation sequence (eg, computer-             |
| 3  | generation     |     | generated random numbers), and list of any factors for stratification.  |
| 4  |                |     | To reduce predictability of a random sequence, details of any planned   |
| 5  |                |     | restriction (eg, blocking) should be provided in a separate document    |
| 6  |                |     | that is unavailable to those who enrol participants or assign           |
| 7  |                |     | interventions. <b>Page 11</b>                                           |
| 8  |                |     |                                                                         |
| 9  | Allocation     | 16b | Mechanism of implementing the allocation sequence (eg, central          |
| 10 | concealment    |     | telephone; sequentially numbered, opaque, sealed envelopes),            |
| 11 | mechanism      |     | describing any steps to conceal the sequence until interventions are    |
| 12 |                |     | assigned. <b>Page 11</b>                                                |
| 13 |                |     |                                                                         |
| 14 | Implementation | 16c | Who will generate the allocation sequence, who will enrol participants, |
| 15 |                |     | and who will assign participants to interventions <b>Page 11</b>        |
| 16 |                |     |                                                                         |
| 17 | Blinding       | 17a | Who will be blinded after assignment to interventions (eg, trial        |
| 18 | (masking)      |     | participants, care providers, outcome assessors, data analysts), and    |
| 19 |                |     | how. <b>Page 9</b>                                                      |
| 20 |                |     |                                                                         |
| 21 |                | 17b | If blinded, circumstances under which unblinding is permissible, and    |
| 22 |                |     | procedure for revealing a participant's allocated intervention during   |
| 23 |                |     | the trial <b>Page 9</b>                                                 |
| 24 |                |     |                                                                         |
| 25 |                |     |                                                                         |

### **Methods: Data collection, management, and analysis**

|    |                 |     |                                                                             |
|----|-----------------|-----|-----------------------------------------------------------------------------|
| 26 |                 |     |                                                                             |
| 27 |                 |     |                                                                             |
| 28 | Data collection | 18a | Plans for assessment and collection of outcome, baseline, and other         |
| 29 | methods         |     | trial data, including any related processes to promote data quality (eg,    |
| 30 |                 |     | duplicate measurements, training of assessors) and a description of         |
| 31 |                 |     | study instruments (eg, questionnaires, laboratory tests) along with         |
| 32 |                 |     | their reliability and validity, if known. Reference to where data           |
| 33 |                 |     | collection forms can be found, if not in the protocol. <b>Pages 13-17</b>   |
| 34 |                 |     |                                                                             |
| 35 |                 | 18b | Plans to promote participant retention and complete follow-up,              |
| 36 |                 |     | including list of any outcome data to be collected for participants who     |
| 37 |                 |     | discontinue or deviate from intervention protocols. <b>Page 13</b>          |
| 38 |                 |     |                                                                             |
| 39 | Data            | 19  | Plans for data entry, coding, security, and storage, including any          |
| 40 | management      |     | related processes to promote data quality (eg, double data entry;           |
| 41 |                 |     | range checks for data values). Reference to where details of data           |
| 42 |                 |     | management procedures can be found, if not in the protocol. <b>Page 17-</b> |
| 43 |                 |     | <b>18 and Appendix 1.</b>                                                   |
| 44 |                 |     |                                                                             |
| 45 |                 |     |                                                                             |
| 46 | Statistical     | 20a | Statistical methods for analysing primary and secondary outcomes.           |
| 47 | methods         |     | Reference to where other details of the statistical analysis plan can be    |
| 48 |                 |     | found, if not in the protocol. <b>Pages 18-21</b>                           |
| 49 |                 |     |                                                                             |
| 50 |                 | 20b | Methods for any additional analyses (eg, subgroup and adjusted              |
| 51 |                 |     | analyses) <b>Pages 18-21</b>                                                |
| 52 |                 |     |                                                                             |
| 53 |                 | 20c | Definition of analysis population relating to protocol non-adherence        |
| 54 |                 |     | (eg, as randomised analysis), and any statistical methods to handle         |
| 55 |                 |     | missing data (eg, multiple imputation) <b>Pages 18-21</b>                   |
| 56 |                 |     |                                                                             |
| 57 |                 |     |                                                                             |
| 58 |                 |     |                                                                             |
| 59 |                 |     |                                                                             |
| 60 |                 |     |                                                                             |

## Methods: Monitoring

- 1  
2  
3  
4  
5  
6  
7  
8  
9  
10  
11  
12  
13  
14  
15  
16  
17  
18  
19  
20  
21  
22  
23
- |                 |     |                                                                                                                                                                                                                                                                                                                                                                            |
|-----------------|-----|----------------------------------------------------------------------------------------------------------------------------------------------------------------------------------------------------------------------------------------------------------------------------------------------------------------------------------------------------------------------------|
| Data monitoring | 21a | Composition of data monitoring committee (DMC); summary of its role and reporting structure; statement of whether it is independent from the sponsor and competing interests; and reference to where further details about its charter can be found, if not in the protocol. Alternatively, an explanation of why a DMC is not needed<br><b>Page 17-18 and Appendix 1.</b> |
|                 | 21b | Description of any interim analyses and stopping guidelines, including who will have access to these interim results and make the final decision to terminate the trial. <b>Page 17-18 and Appendix 1.</b>                                                                                                                                                                 |
| Harms           | 22  | Plans for collecting, assessing, reporting, and managing solicited and spontaneously reported adverse events and other unintended effects of trial interventions or trial conduct. <b>Page 18 and Appendix 1.</b>                                                                                                                                                          |
| Auditing        | 23  | Frequency and procedures for auditing trial conduct, if any, and whether the process will be independent from investigators and the sponsor. <b>Not applicable as this is a minimal risk study.</b>                                                                                                                                                                        |

## Ethics and dissemination

- 24  
25  
26  
27  
28  
29  
30  
31  
32  
33  
34  
35  
36  
37  
38  
39  
40  
41  
42  
43  
44  
45  
46  
47  
48  
49  
50  
51  
52  
53  
54  
55  
56  
57  
58  
59  
60
- |                          |     |                                                                                                                                                                                                                                                   |
|--------------------------|-----|---------------------------------------------------------------------------------------------------------------------------------------------------------------------------------------------------------------------------------------------------|
| Research ethics approval | 24  | Plans for seeking research ethics committee/institutional review board (REC/IRB) approval. <b>Page 21</b>                                                                                                                                         |
| Protocol amendments      | 25  | Plans for communicating important protocol modifications (eg, changes to eligibility criteria, outcomes, analyses) to relevant parties (eg, investigators, REC/IRBs, trial participants, trial registries, journals, regulators). <b>Page 21.</b> |
| Consent or assent        | 26a | Who will obtain informed consent or assent from potential trial participants or authorised surrogates, and how (see Item 32). <b>Pages 11 and 20.</b>                                                                                             |
|                          | 26b | Additional consent provisions for collection and use of participant data and biological specimens in ancillary studies, if applicable                                                                                                             |
| Confidentiality          | 27  | How personal information about potential and enrolled participants will be collected, shared, and maintained in order to protect confidentiality before, during, and after the trial. <b>Page 21</b>                                              |
| Declaration of interests | 28  | Financial and other competing interests for principal investigators for the overall trial and each study site. <b>Page 26</b>                                                                                                                     |
| Access to data           | 29  | Statement of who will have access to the final trial dataset, and disclosure of contractual agreements that limit such access for investigators. <b>Page 26</b>                                                                                   |

|    |                   |     |                                                                              |
|----|-------------------|-----|------------------------------------------------------------------------------|
| 1  |                   |     |                                                                              |
| 2  | Ancillary and     | 30  | Provisions, if any, for ancillary and post-trial care, and for               |
| 3  | post-trial care   |     | compensation to those who suffer harm from trial participation.              |
| 4  |                   |     | <b>This is a minimal risk study. Risks management is presented in</b>        |
| 5  |                   |     | <b>Appendix 1.</b>                                                           |
| 6  |                   |     |                                                                              |
| 7  | Dissemination     | 31a | Plans for investigators and sponsor to communicate trial results to          |
| 8  | policy            |     | participants, healthcare professionals, the public, and other relevant       |
| 9  |                   |     | groups (eg, via publication, reporting in results databases, or other        |
| 10 |                   |     | data sharing arrangements), including any publication restrictions.          |
| 11 |                   |     | <b>Page 21</b>                                                               |
| 12 |                   |     |                                                                              |
| 13 |                   | 31b | Authorship eligibility guidelines and any intended use of professional       |
| 14 |                   |     | writers. <b>Page 21</b>                                                      |
| 15 |                   |     |                                                                              |
| 16 |                   | 31c | Plans, if any, for granting public access to the full protocol, participant- |
| 17 |                   |     | level dataset, and statistical code. <b>Page 21</b>                          |
| 18 |                   |     |                                                                              |
| 19 |                   |     |                                                                              |
| 20 | <b>Appendices</b> |     |                                                                              |
| 21 |                   |     |                                                                              |
| 22 | Informed consent  | 32  | Model consent form and other related documentation given to                  |
| 23 | materials         |     | participants and authorised surrogates. <b>Appendix 2.</b>                   |
| 24 |                   |     |                                                                              |
| 25 | Biological        | 33  | Plans for collection, laboratory evaluation, and storage of biological       |
| 26 | specimens         |     | specimens for genetic or molecular analysis in the current trial and for     |
| 27 |                   |     | future use in ancillary studies, if applicable. <b>Not applicable.</b>       |

---

\*It is strongly recommended that this checklist be read in conjunction with the SPIRIT 2013 Explanation & Elaboration for important clarification on the items. Amendments to the protocol should be tracked and dated. The SPIRIT checklist is copyrighted by the SPIRIT Group under the Creative Commons "[Attribution-NonCommercial-NoDerivs 3.0 Unported](https://creativecommons.org/licenses/by-nc-nd/3.0/)" license.
